# Supplementary material for: ZNF384 Fusion Oncoproteins Drive Lineage Aberrancy in Acute Leukemia
Source: Oxford University Press journal article supplement (doi:10.1158/2643-3230.bcd-21-0163), 2022-03-04
Supplement: bcd-21-0163_supplementary_tables_suppsf1-sf15.xlsx [file bcd-21-0163_supplementary_tables_suppsf1-sf15.xlsx]

## Sheet: ST1
Supplemental Table 1. Summary of published ZNF384-rearranged leukemia.
N terminal partner	Exon breakpoint	Age range	Age median	B-ALL reports	MPAL reports	References
EP300	e6-e3, e6-e2, e11-e3	20515	16	84	9	1, 2, 4, 5, 6, 7, 8, 9, 10, 12, 13, 14, 15, 16, 17
CREBBP	e4-e3, e5-e3, e6-e2, e6-e3	23408	7	7	1	1, 3, 6, 7, 9, 14
TCF3	e11-e2, e11-e3, e13-e2, e13-e3, e13-e5, e16-e2, e17-e7, e18-e7	12055	4	49	10	1, 3, 6, 7, 9
TAF15	e6-e3, e7-e3, e9-e3, e11-e3	27089	16	27	3	1, 3, 6, 7, 9, 11
EWSR1	e7-e2, e7-e3, e7-e7, e8-e2, e11-e3	43890	4	7	1	2, 6, 7, 9, 11, 15
CTLC	e21-e3	10	10	1	0	7
ARID1B	e4-e4, e5-e4, e9-e3	43943	7	3	0	6, 7, 15
SMARCA2	e4-e3	11	11	1	0	6,7
NIPBL	e9-e2	7	7	1	0	7
ATP5C1	e4-e3	7	7	1	0	10
BMP2K	e14-e3, e15-e3	5	5	1	0	3
SMARCA4	N/A	12	12	1	0	16
SYNRG	e14-e3	22	22	1	0	16
SMARCA2-ZNF362	N/A	15	15	1	0	9
1Alexander, T.B., Gu, Z., Iacobucci, I., Dickerson, K., Choi, J.K., Xu, B., Payne-Turner, D., Yoshihara, H., Loh, M.L., Horan, J., et al. (2018). The genetic basis and cell of origin of mixed phenotype acute leukaemia. Nature 562, 373-379.
2Chen, X., Wang, F., Cao, P., Zhang, Y., Ma, X., Liu, M., Teng, W., Yang, J., Zhang, J., Wang, T., et al. (2019). Novel three-way fusions among ZNF384, EWSR1 and EHMT1 genes in paediatric B cell precursor acute lymphoblastic leukaemia with translocations resembling Philadelphia chromosomes. Br J Haematol 187, e75-e79.
3Hirabayashi, S., Ohki, K., Nakabayashi, K., Ichikawa, H., Momozawa, Y., Okamura, K., Yaguchi, A., Terada, K., Saito, Y., Yoshimi, A., et al. (2017). ZNF384-related fusion genes define a subgroup of childhood B-cell precursor acute lymphoblastic leukemia with a characteristic immunotype. Haematologica 102, 118-129.
4Gocho, Y., Kiyokawa, N., Ichikawa, H., Nakabayashi, K., Osumi, T., Ishibashi, T., Ueno, H., Terada, K., Oboki, K., Sakamoto, H., et al. (2015). A novel recurrent EP300-ZNF384 gene fusion in B-cell precursor acute lymphoblastic leukemia. Leukemia 29, 2445-2448.
5Griffith, M., Griffith, O.L., Krysiak, K., Skidmore, Z.L., Christopher, M.J., Klco, J.M., Ramu, A., Lamprecht, T.L., Wagner, A.H., Campbell, K.M., et al. (2016). Comprehensive genomic analysis reveals FLT3 activation and a therapeutic strategy for a patient with relapsed adult B-lymphoblastic leukemia. Exp Hematol 44, 603-613.
6Gu, Z., Churchman, M., Roberts, K., Li, Y., Liu, Y., Harvey, R.C., McCastlain, K., Reshmi, S.C., Payne-Turner, D., Iacobucci, I., et al. (2016). Genomic analyses identify recurrent MEF2D fusions in acute lymphoblastic leukaemia. Nature communications 7, 13331.
7Gu, Z., Churchman, M.L., Roberts, K.G., Moore, I., Zhou, X., Nakitandwe, J., Hagiwara, K., Pelletier, S., Gingras, S., Berns, H., et al. (2019). PAX5-driven subtypes of B-progenitor acute lymphoblastic leukemia. Nat Genet 51, 296-307.
8Lilljebjorn, H., Henningsson, R., Hyrenius-Wittsten, A., Olsson, L., Orsmark-Pietras, C., von Palffy, S., Askmyr, M., Rissler, M., Schrappe, M., Cario, G., et al. (2016). Identification of ETV6-RUNX1-like and DUX4-rearranged subtypes in paediatric B-cell precursor acute lymphoblastic leukaemia. Nat Commun 7, 11790.
9Liu, Y.F., Wang, B.Y., Zhang, W.N., Huang, J.Y., Li, B.S., Zhang, M., Jiang, L., Li, J.F., Wang, M.J., Dai, Y.J., et al. (2016). Genomic Profiling of Adult and Pediatric B-cell Acute Lymphoblastic Leukemia. EBioMedicine 8, 173-183.
10Marincevic-Zuniga, Y., Dahlberg, J., Nilsson, S., Raine, A., Nystedt, S., Lindqvist, C.M., Berglund, E.C., Abrahamsson, J., Cavelier, L., Forestier, E., et al. (2017). Transcriptome sequencing in pediatric acute lymphoblastic leukemia identifies fusion genes associated with distinct DNA methylation profiles. J Hematol Oncol 10, 148.
11Martini, A., La Starza, R., Janssen, H., Bilhou-Nabera, C., Corveleyn, A., Somers, R., Aventin, A., Foa, R., Hagemeijer, A., Mecucci, C., et al. (2002). Recurrent rearrangement of the Ewing's sarcoma gene, EWSR1, or its homologue, TAF15, with the transcription factor CIZ/NMP4 in acute leukemia. Cancer Res 62, 5408-5412.
12McClure, B.J., Heatley, S.L., Kok, C.H., Sadras, T., An, J., Hughes, T.P., Lock, R.B., Yeung, D., Sutton, R., and White, D.L. (2018). Pre-B acute lymphoblastic leukaemia recurrent fusion, EP300-ZNF384, is associated with a distinct gene expression. Br J Cancer 118, 1000-1004.
13Ping, N., Qiu, H., Wang, Q., Dai, H., Ruan, C., Ehrentraut, S., Drexler, H.G., MacLeod, R.A., and Chen, S. (2015). Establishment and genetic characterization of a novel mixed-phenotype acute leukemia cell line with EP300-ZNF384 fusion. J Hematol Oncol 8, 100.
14Qian, M., Zhang, H., Kham, S.K., Liu, S., Jiang, C., Zhao, X., Lu, Y., Goodings, C., Lin, T.N., Zhang, R., et al. (2017). Whole-transcriptome sequencing identifies a distinct subtype of acute lymphoblastic leukemia with predominant genomic abnormalities of EP300 and CREBBP. Genome Res 27, 185-195.
15Shago, M., Abla, O., Hitzler, J., Weitzman, S., and Abdelhaleem, M. (2016). Frequency and outcome of pediatric acute lymphoblastic leukemia with ZNF384 gene rearrangements including a novel translocation resulting in an ARID1B/ZNF384 gene fusion. Pediatr Blood Cancer 63, 1915-1921.
16Yasuda, T., Tsuzuki, S., Kawazu, M., Hayakawa, F., Kojima, S., Ueno, T., Imoto, N., Kohsaka, S., Kunita, A., Doi, K., et al. (2016). Recurrent DUX4 fusions in B cell acute lymphoblastic leukemia of adolescents and young adults. Nat Genet 48, 569-574.
17Zaliova, M., Stuchly, J., Winkowska, L., Musilova, A., Fiser, K., Slamova, M., Starkova, J., Vaskova, M., Hrusak, O., Sramkova, L., et al. (2019). Genomic landscape of pediatric B-other acute lymphoblastic leukemia in a consecutive European cohort. Haematologica 104, 1396-1406.

## Sheet: ST2
Supplemental Table 2. Patient samples and concominant lesions.
Patient	Disease	Fusion	Publication	WES	WGS	CNV	AASDH	ABCA1	ACAA1	ACOX2	ACSM2A	ACTN2	ADAMTS14	ADAMTS15	ADAMTS17	ADAMTSL3	ADCYAP1R1	ADD3	ADGRB3	ADGRL2	ADH1B	ADRA1A	ADRB1	AEBP2	AGAP1	AGBL1	AHNAK2	ALDH16A1	ALDH1A1	ALDOB	ALDOC	ALLC	AMPD3	ANK2	ANKH	ANKRD27	ANKRD34C	ANO1	APBB1	APC	APOA4	APT10A	AQP10	AR	ARF4	ARFGEF2	ARHGAP42	ARHGAP44	ARHGAP8
SJBALL014146	B-ALL	EP300::ZNF384	3
SJBALL014363	B-ALL	EP300::ZNF384	3
SJBALL014594	B-ALL	CREBBP::ZNF384	7
SJBALL023826	B-ALL	ARID1B::ZNF384	7
SJBALL020587	B-ALL	EP300::ZNF384	3,6			YES
SJBALL020606	B-ALL	EP300::ZNF384	3,6			YES
SJBALL020710	B-ALL	EP300::ZNF384	3,6	YES	YES	YES																														T512_E17splice
SJBALL020732	B-ALL	EP300::ZNF384	3,6	YES		YES
SJBALL020801	B-ALL	TCF3::ZNF384	3,6	YES		YES																							T105_E4splice						R204C
SJBALL020869	B-ALL	EP300::ZNF384	3,6			YES
SJBALL030808	B-ALL	TCF3::ZNF384
SJBALL030971	B-ALL	TCF3::ZNF384	4
SJALL050008	B-ALL	TCF3::ZNF384	3, 5
SJALL054505	B-ALL	EP300::ZNF384	3, 5
SJALL049957	B-ALL	TCF3::ZNF384	3, 5
SJALL049961	B-ALL	EP300::ZNF384	3, 5
SJALL049963	B-ALL	EP300::ZNF384	3, 5
SJALL049992	B-ALL	NoFusion	3, 5
SJBALL021992	B-ALL	CLTC::ZNF384	3,6	YES		YES																					V3876M
SJBALL022002	B-ALL	CREBBP::ZNF384	3,6	YES		YES
SJALL040092	B-ALL	EP300::ZNF384	3	YES	YES	YES			R79G
SJBALL021968	B-ALL	EP300::ZNF384	3,6			YES
SJBALL021973	B-ALL	EP300::ZNF384	3,6	YES		YES
SJBALL021995	B-ALL	EWSR1::ZNF384	3,6	YES		YES														D670E
SJALL040058	B-ALL	TAF15::ZNF384	3	YES
SJBALL046121	B-ALL	EP300::ZNF384	3	YES	YES																							D296fs											R451C
SJBALL042315	B-ALL	EP300::ZNF384	3
SJALL044302	B-ALL	TAF15::ZNF384	4	YES	YES																									V205D
SJALL047968	B-ALL	EWSR1::ZNF384	4	YES	YES
SJBALL015140	B-ALL	TAF15::ZNF384	3	YES	YES
SJBALL087	B-ALL	TCF3::ZNF384	3	YES		YES
SJBALL015174	B-ALL	EP300::ZNF384	3
SJBALL015173	B-ALL	EP300::ZNF384	3
SJBALL015088	B-ALL	EP300::ZNF384	3, 5
SJBALL015150	B-ALL	EP300::ZNF384	3, 5
SJBALL015134	B-ALL	EP300::ZNF384	3
SJBALL020160	B-ALL	TCF3::ZNF384	3		YES	YES																																				Deletion
SJALL015955	B-ALL	EP300::ZNF384	3			YES
SJALL015961	B-ALL	EWSR1::ZNF384	3	YES		YES
SJALL015986	B-ALL	ARID1B::ZNF384	3	YES		YES																										A196E
SJALL016659	B-ALL	NIPBL::ZNF384	3	YES																		F82S
SJALL049938	B-ALL	EP300::ZNF384
SJALL054527	B-ALL	EP300::ZNF384	4	YES	YES					G242R																												G983R
SJALL060140	B-ALL	EP300::ZNF384	4	YES
SJALL061701	B-ALL	TCF3::ZNF384	4	YES																																					A249T
SJALL060694	B-ALL	EP300::ZNF384	4	YES							N89K																							A1085V
SJALL061958	B-ALL	EP300::ZNF384	4
SJALL061596	B-ALL	EP300::ZNF384
SJBALL046131	B-ALL	TCF3::ZNF384
SJALL066361	B-ALL	EP300::ZNF384	5
SJALL066374	B-ALL	ZBTB47::ZNF652	5
SJALL066407	B-ALL	TAF15::ZNF384	5
SJBALL021816	B-ALL	ARID1B::ZNF384	2,3			YES
SJBALL020140	B-ALL	EP300::ZNF384	2,3	YES	YES	YES
SJBALL020460	B-ALL	EP300::ZNF384	2,3	YES	YES	YES
SJBALL020492	B-ALL	EP300::ZNF384	2,3	YES		YES									G329R
SJBALL021131	B-ALL	EP300::ZNF384	2,3			YES
SJCOGALL010225	B-ALL	EP300::ZNF384	2,3	YES		YES													A963V
SJBALL021128	B-ALL	SMARCA2::ZNF362	2,3			YES
SJCOGALL010912	B-ALL	SMARCA2::ZNF362	2,3	YES		YES															V53M				A772V
SJBALL020571	B-ALL	SMARCA2::ZNF384	2,3	YES	YES	YES												Deletion
SJBALL016221	B-ALL	TAF15::ZNF384	2,3	YES
SJBALL020490	B-ALL	TAF15::ZNF384	2,3	YES	YES	YES																				T719M
SJBALL021554	B-ALL	TAF15::ZNF384	2,3	YES		YES
SJBALL020409	B-ALL	TCF3::ZNF384	2,3	YES		YES																																		S1395G
SJBALL020476	B-ALL	TCF3::ZNF384	2,3	YES	YES	YES						V235M																									R243H
SJBALL020513	B-ALL	TCF3::ZNF384	2,3	YES		YES
SJBALL021784	B-ALL	NoFusion	3,6			YES
SJBALL021517	B-ALL	TCF3::ZNF384	3,6			YES
SJBALL031	B-ALL	TCF3::ZNF384	8	YES									R779W
SJBALL182	B-ALL	TAF15::ZNF384	3, 8	YES		YES											A200V																													V675F
SJMPAL012422	MPAL(B/M)	CREBBP::ZNF384	1	YES												C1659Y								Deletion									Y134C														T377A
SJMPAL012425	MPAL(B/M)	EP300::ZNF384	1	YES			A308V
SJMPAL040024	MPAL(B/M)	TCF3::ZNF384	1	YES
SJMPAL040025	MPAL(B/M)	TAF15::ZNF384	1	YES	YES
SJMPAL040031	MPAL(B/M)	TCF3::ZNF384	1	YES
SJMPAL040033	MPAL(B/M)	EP300::ZNF384	1	YES				R443K
SJMPAL040034	MPAL(B/M)	TCF3::ZNF384	1	YES
SJMPAL041118	MPAL(B/M)	TCF3::ZNF384	1	YES
SJMPAL043508	MPAL(B/M)	EP300::ZNF384	1	YES	YES									T288K																	C178Y													Y447C	Y58fs			V461A
SJMPAL043512	MPAL(B/M)	EP300::ZNF384	1	YES
SJMPAL046466	MPAL(B/M)	TCF3::ZNF384	1	YES
SJMPAL046467	MPAL(B/M)	TCF3::ZNF384	1
SJMPAL046472	MPAL(B/M)	TCF3::ZNF384	1
SJMPAL040028	MPAL(B/M)	TCF3::ZNF384	1	YES	YES																		A296T
SJMPAL043506	MPAL(B/M)	EP300::ZNF384	1		YES																																						A187V
Whole exome sequencing (WES), whole genome sequencing (WGS), copy number variation (CNV), loss of heterozygosity (LOH)
Publications
1Alexander, T.B., Gu, Z., Iacobucci, I., Dickerson, K., Choi, J.K., Xu, B., Payne-Turner, D., Yoshihara, H., Loh, M.L., Horan, J., et al. (2018). The genetic basis and cell of origin of mixed phenotype acute leukaemia. Nature 562, 373-379.
2Gu, Z., Churchman, M., Roberts, K., Li, Y., Liu, Y., Harvey, R.C., McCastlain, K., Reshmi, S.C., Payne-Turner, D., Iacobucci, I., et al. (2016). Genomic analyses identify recurrent MEF2D fusions in acute lymphoblastic leukaemia. Nature communications 7, 13331.
3Gu, Z., Churchman, M.L., Roberts, K.G., Moore, I., Zhou, X., Nakitandwe, J., Hagiwara, K., Pelletier, S., Gingras, S., Berns, H., et al. (2019). PAX5-driven subtypes of B-progenitor acute lymphoblastic leukemia. Nat Genet 51, 296-307.
4Montefiori, L.E., Bendig, S., Gu, Z., Chen, X., Polonen, P., Ma, X., Murison, A., Zeng, A., Garcia-Prat, L., Dickerson, K., et al. (2021). Enhancer hijacking drives oncogenic BCL11B expression in lineage ambiguous stem cell leukemia. Cancer Discov.
5Paietta, E., Roberts, K.G., Wang, V., Gu, Z., Buck, G., Pei, D., Cheng, C., Levine, R.L., Abdel-Wahab, O., Cheng, Z., et al. (2021). Molecular Classification Improves Risk Assessment in Adult BCR-ABL1-negative B-ALL. Blood.
6Roberts, K.G., Li, Y., Payne-Turner, D., Harvey, R.C., Yang, Y.L., Pei, D., McCastlain, K., Ding, L., Lu, C., Song, G., et al. (2014). Targetable kinase-activating lesions in Ph-like acute lymphoblastic leukemia. The New England journal of medicine 371, 1005-1015.
7Roberts, K.G., Gu, Z., Payne-Turner, D., McCastlain, K., Harvey, R.C., Chen, I.M., Pei, D., Iacobucci, I., Valentine, M., Pounds, S.B., et al. (2017). High Frequency and Poor Outcome of Philadelphia Chromosome-Like Acute Lymphoblastic Leukemia in Adults. J Clin Oncol 35, 394-401.
8Waanders, E., Gu, Z., Dobson, S.M., Antic, Z., Crawford, J.C., Ma, X., Edmonson, M.N., Payne-Turner, D., van der Vorst, M., Jongmans, M.C.J., et al. (2020). Mutational landscape and patterns of clonal evolution in relapsed pediatric acute lymphoblastic leukemia. Blood Cancer Discov 1, 96-111.
[truncated: 508 more columns]

## Sheet: ST3
Supplemental Table 3. Summary of all mouse transplantation experiments.
Experiment name	Donor	Lentivirus	n	Median survival	Diagnosis	Secondary
KD018	BL/6	Empty Vector	2	n/a
		ZNF384	2	n/a
		NRAS G12D	6	149	Mast cell tumor, T-cell leukemia
		TCF3::ZNF384 -e8	8	n/a
		TCZ & NRAS	6	81	MPO+ myeloid leukemia, Mast cell neoplasm	0.333333
KD019	BL/6	NRAS G12D	2	84	CD3+ Lymphoma
		TCF3::ZNF384 +e8	6	n/a
		TCZ +e8 & NRAS	5	21	Myeloid and monocytic leukemia/histocytic sarcoma	0/4
KD022	BL/6	NRAS G12D	4	70
		TCZ +e8 & NRAS	8	53	MPO+ myeloid leukemia	0/1
		TCZ -e8 & NRAS	8	23	MPO+ myeloid leukemia	0/1
KD025	BL/6	Empty Vector	3	n/a
		NRAS G12D	3	84
		EP300::ZNF384	6	125*	MPO+ myeloid leukemia	1
		EZ & NRAS	6	84	MPO+ myeloid leukemia	1
KD027	BL/6	NRAS G12D	6	87
		TAF15::ZNF384	4	n/a
		TAZ & NRAS	5	81	Histocytic sarcoma	0/1
KD023	ARF-null	Empty Vector	2	n/a
		NRAS G12D	3	42	CD3+ Lymphoma
		TCF3::ZNF384 -e8	5	n/a
		TCF3::ZNF384 +e8	5	n/a
		TCZ -e8 & NRAS	7	29	MPO+ myelomonocytic leukemia	0.5
		TCZ +e8 & NRAS	7	25	MPO+ myeloid leukemia	0/2

## Sheet: ST4
Supplemental Table 4. Details of mouse transplantation experiments.
Mouse ID	Experiment	Genotype	Insert	Transduction efficiency %	# of cells transplanted	Transplant method	Latency	Flow notes	Spleen GFP%	Spleen RFP%	Spleen DP%	Bone Marrow GFP%	Bone Marrow RFP%	Bone Marrow DP%	B220	CD19	CD3	Mac1	Gr1	CD41	Ter119	Lineage (-)	LSK % of lin-	GMP % of lin-	CMP % of lin-	MEP % of lin-	Diagnosis	Tansplantable	Comments	RNA-seq	WES
1705	KD018	WT BL6	CL20-MIR NRAS G12D	2	250000	TVI unsorted	180		0	30	0	0	23	0	5	3	38	3	4	1	4
1706	KD018	WT BL6	CL20-MIR NRAS G12D	2	250000	TVI unsorted	172	Limited sample availability				0	2	0								202	36.1386	0	0.49505	0
1707	KD018	WT BL6	CL20-MIR NRAS G12D	2	250000	TVI unsorted	79	Found dead
1708	KD018	WT BL6	CL20-MIR NRAS G12D	2	250000	TVI unsorted	157		0	39	0	0	15	0	92	21	13	40	45	1	16	2397	13.0163	0.0834376	0.0834376	1.25156
1717	KD018	WT BL6	NRAS G12D and TCF3::ZNF384 e13-e5 CHA (-e8)	0.5	250000	TVI unsorted	81	Found dead
1718	KD018	WT BL6	NRAS G12D and TCF3::ZNF384 e13-e5 CHA (-e8)	0.5	250000	TVI unsorted	34		65	25	25	95	95	95	0	0	1	82	65	1	0						Myeloid leukemia	No	2e5 sorted, TVI	Yes	Yes
1719	KD018	WT BL6	NRAS G12D and TCF3::ZNF384 e13-e5 CHA (-e8)	0.5	250000	TVI unsorted	141		23	30	23	2	9	2	99	1	0	12	20	84	36						RFP+ Mast cell tumor	n/a
1720	KD018	WT BL6	NRAS G12D and TCF3::ZNF384 e13-e5 CHA (-e8)	0.5	250000	TVI unsorted	81		33	38	31	44	48	41	25	0	10	65	84	n/a	5	8731	0.962089	1.98145	0.744474	0.0687207	Myeloid leukemia, CD3+ thymic lymphoma	No	2e5 sorted, TVI
1721	KD018	WT BL6	NRAS G12D and TCF3::ZNF384 e13-e5 CHA (-e8)	0.5	250000	TVI unsorted	141		1	59	1	2	47	1	100	2	0	19	10	81	26						RFP+ T-cell leukemia, Mast cell tumor	n/a
1722	KD018	WT BL6	NRAS G12D and TCF3::ZNF384 e13-e5 CHA (-e8)	0.5	250000	TVI unsorted	87		4	4	3	10	9	8	26	0	2	64	63	n/a	1						Myeloid leukemia, Mast Cell mastocytosis	n/a
1723	KD018	WT BL6	NRAS G12D and TCF3::ZNF384 e13-e5 CHA (-e8)	0.5	250000	TVI unsorted	69		15	16	15	27	27	26	42	0	8	82	95	n/a	0						Myeloid leukemia	Yes	1.6e5 sorted, TVI	Yes	Yes
1724	KD018	WT BL6	NRAS G12D and TCF3::ZNF384 e13-e5 CHA (-e8)	0.5	250000	TVI unsorted	81		10	55	10	22	56	22	11	0	0	18	10	n/a	4						Myeloid leukemia, Mast Cell Neoplasm	n/a
984	KD019	WT BL6	CL20-MIR NRAS G12D	n/a	270000	TVI unsorted	62		0	10	0	0	25	0	92	25	8	83	79	7	48	20179	4.63849	2.35889	0.0693791	0.346895	CD3+ Lymphoma	n/a		Yes	Yes
985	KD019	WT BL6	CL20-MIR NRAS G12D	n/a	270000	TVI unsorted	106	Found dead																				n/a
973	KD019	WT BL6	NRAS G12D and TCF3::ZNF384 e13-e5 CHA (+e8)	n/a	240000	TVI unsorted	21		77	92	77	88	95	88	79	10	1	82	91	0	11						Myeloid leukemia and monocytic leukemia/histocytic sarcoma	No	3e5 sorted, TVI
974	KD019	WT BL6	NRAS G12D and TCF3::ZNF384 e13-e5 CHA (+e8)	n/a	240000	TVI unsorted	19		82	90	82	70	74	70	77	4	0	86	88	0	8							No	3e5 sorted, TVI
975	KD019	WT BL6	NRAS G12D and TCF3::ZNF384 e13-e5 CHA (+e8)	n/a	240000	TVI unsorted	21		62	78	62	74	87	74	64	11	1	81	87	1	11	3328	1.65264	3.72596	0.270433	0.0901442	Myeloid leukemia and monocytic leukemia/histocytic sarcoma	No	3e5 sorted, TVI
976	KD019	WT BL6	NRAS G12D and TCF3::ZNF384 e13-e5 CHA (+e8)	n/a	240000	TVI unsorted	22		59	79	59	67	87	67	91	8	1	82	88	1	12							No	3e5 sorted, TVI
977	KD019	WT BL6	NRAS G12D and TCF3::ZNF384 e13-e5 CHA (+e8)	n/a	240000	TVI unsorted	25		71	78	71	72	83	72	74	3	0	85	88	0	8						Myeloid leukemia and monocytic leukemia/histocytic sarcoma	n/a
71	KD022	WT BL6	CL20-MIR NRAS G12D	5	250000	TVI unsorted	70	Found dead
73	KD022	WT BL6	CL20-MIR NRAS G12D	5	250000	TVI unsorted	74	Found dead
74	KD022	WT BL6	CL20-MIR NRAS G12D	5	250000	TVI unsorted	61	Found dead
61	KD022	WT BL6	NRAS G12D and TCF3::ZNF384 e13-e5 CHA (+e8)	2	250000	TVI unsorted	59		78	77	76	95	94	95	18	0	0	91	99	1	1	1172	0.170648	0.0853242	0	0	Myeloid leukemia	No	2e5 sorted, TVI	Yes	Yes
62	KD022	WT BL6	NRAS G12D and TCF3::ZNF384 e13-e5 CHA (+e8)	2	250000	TVI unsorted	31		61	61	61	94	94	94	32	0	0	84	89	0	0	479	10.0209	0.208768	0	1.67015				Yes	Yes
63	KD022	WT BL6	NRAS G12D and TCF3::ZNF384 e13-e5 CHA (+e8)	2	250000	TVI unsorted	59		90	90	89	84	82	82	15	0	0	88	93	3	2	1010	3.26733	0.19802	0.792079	0
64	KD022	WT BL6	NRAS G12D and TCF3::ZNF384 e13-e5 CHA (+e8)	2	250000	TVI unsorted	46		76	77	75	92	93	92	20	0	0	95	99	0	1						Myeloid leukemia
65	KD022	WT BL6	NRAS G12D and TCF3::ZNF384 e13-e5 CHA (+e8)	2	250000	TVI unsorted	31		77	77	77	90	90	90	79	0	0	85	94	0	1	1976	2.73279	0.0506073	0	1.11336				Yes	Yes
78	KD022	WT BL6	NRAS G12D and TCF3::ZNF384 e13-e5 CHA (+e8)	2	250000	TVI unsorted	60		74	74	72	91	90	91	9	0	0	83	99	1	1
79	KD022	WT BL6	NRAS G12D and TCF3::ZNF384 e13-e5 CHA (+e8)	2	250000	TVI unsorted	59		43	49	42	54	70	54	26	1	0	91	99	8	2
80	KD022	WT BL6	NRAS G12D and TCF3::ZNF384 e13-e5 CHA (+e8)	2	250000	TVI unsorted	38		57	57	57	79	79	79	44	0	0	81	88	0	1
66	KD022	WT BL6	NRAS G12D and TCF3::ZNF384 e13-e5 CHA (-e8)	2	250000	TVI unsorted	24		38	38	38	87	87	87	40	0	0	83	73	0	1	13301	0.631531	0.0676641	0	0.225547		No	2e5 sorted, TVI	Yes	Yes
67	KD022	WT BL6	NRAS G12D and TCF3::ZNF384 e13-e5 CHA (-e8)	2	250000	TVI unsorted	23	Found dead
68	KD022	WT BL6	NRAS G12D and TCF3::ZNF384 e13-e5 CHA (-e8)	2	250000	TVI unsorted	23		28	28	28	80	80	80	29	0	0	79	68	0	1	3213	0.715842	0.342359	0.124494	0	Myeloid leukemia			Yes	Yes
69	KD022	WT BL6	NRAS G12D and TCF3::ZNF384 e13-e5 CHA (-e8)	2	250000	TVI unsorted	19		72	73	68	84	86	84	72	3	2	72	73	2	3	15602	1.06397	1.23702	0.0256377	0.320472
70	KD022	WT BL6	NRAS G12D and TCF3::ZNF384 e13-e5 CHA (-e8)	2	250000	TVI unsorted	26		36	36	36	79	83	79	72	0	0	90	68	0	1
75	KD022	WT BL6	NRAS G12D and TCF3::ZNF384 e13-e5 CHA (-e8)	2	250000	TVI unsorted	26		35	35	35	91	91	91	26	0	0	87	58	0	0									Yes	Yes
76	KD022	WT BL6	NRAS G12D and TCF3::ZNF384 e13-e5 CHA (-e8)	2	250000	TVI unsorted	23		39	39	39	76	76	76	18	0	0	81	74	0	1						Myeloid leukemia
77	KD022	WT BL6	NRAS G12D and TCF3::ZNF384 e13-e5 CHA (-e8)	2	250000	TVI unsorted	17		59	63	59	78	64	61	87	8	4	83	83	3	4	10329	1.76203	0.948785	0.0677704	0.600252
2720	KD025	WT BL6	CL20-MIR NRAS G12D	10	500000	TVI unsorted	126		0	13	0	0	3	0	48	34	12	27	44	5	12
2721	KD025	WT BL6	CL20-MIR NRAS G12D	10	500000	TVI unsorted	60	Found dead
2710	KD025	WT BL6	EP300-ZNF384 e6-e3 NHA	52	500000	TVI unsorted	125		47	0	0	90	0	0	10	0	0	92	16	1	0	14	28.5714	0	0	0		Yes	2e5 sorted, TVI	Yes	Yes
2713	KD025	WT BL6	NRAS G12D and EP300::ZNF384 e6-e3 NHA	24	500000	TVI unsorted	83	Found dead
2714	KD025	WT BL6	NRAS G12D and EP300::ZNF384 e6-e3 NHA	24	500000	TVI unsorted	85		44	15	40	77	8	76	5	0	0	63	94	2	30	11165	1.87192	0.232871	0	0.456785	Myeloid leukemia and mast cell tumor	Yes	2e5 sorted, TVI	Yes	Yes
2715	KD025	WT BL6	NRAS G12D and EP300::ZNF384 e6-e3 NHA	24	500000	TVI unsorted	85		7	10	6	1	1	1	44	9	5	69	84	13	25
2716	KD025	WT BL6	NRAS G12D and EP300::ZNF384 e6-e3 NHA	24	500000	TVI unsorted	83	Found dead
2717	KD025	WT BL6	NRAS G12D and EP300::ZNF384 e6-e3 NHA	24	500000	TVI unsorted	84		4	26	4	2	9	2	64	15	14	23	44	12	17
2718	KD025	WT BL6	NRAS G12D and EP300::ZNF384 e6-e3 NHA	24	500000	TVI unsorted	48	Found dead
841	KD027	WT BL6	CL20-MIR NRAS G12D	9	200000	TVI unsorted	80	Found dead
842	KD027	WT BL6	CL20-MIR NRAS G12D	9	200000	TVI unsorted	94	Found dead
843	KD027	WT BL6	NRAS G12D and TAF15::ZNF384 e6-e3 NHA	19	200000	TVI unsorted	80	Found dead
844	KD027	WT BL6	NRAS G12D and TAF15::ZNF384 e6-e3 NHA	19	200000	TVI unsorted	81		14	37	3	56	31	27	29	12	2	92	93	0	2							No	5e5 unsorted, TVI
845	KD027	WT BL6	NRAS G12D and TAF15::ZNF384 e6-e3 NHA	19	200000	TVI unsorted	81		30	75	26	26	89	24	0	0	1	1	1	0	0
846	KD027	WT BL6	NRAS G12D and TAF15::ZNF384 e6-e3 NHA	19	200000	TVI unsorted	80	Found dead
847	KD027	WT BL6	NRAS G12D and TAF15::ZNF384 e6-e3 NHA	19	200000	TVI unsorted	81		15	29	8	14	37	3	59	51	21	86	90	5	12
848	KD027	WT BL6	NRAS G12D and TAF15::ZNF384 e6-e3 NHA	19	200000	TVI unsorted	90		4	46	2	2	24	1	7	18	28	17	15	12	9
849	KD027	WT BL6	NRAS G12D and TAF15::ZNF384 e6-e3 NHA	19	200000	TVI unsorted	27		21	44	15	40	41	30	23	10	2	88	93	5	30						Mastocytosis, histocytic sarcoma
166	KD023	ARF-null	CL20-MIR NRAS G12D	13	500000	TVI unsorted	77		0	67	0	0	87	0	46	9	0	75	86	1	11						Thymic lymphoma, myeloid proliferation
167	KD023	ARF-null	CL20-MIR NRAS G12D	13	500000	TVI unsorted	32	Found dead
168	KD023	ARF-null	CL20-MIR NRAS G12D	13	500000	TVI unsorted	42		0	39	0	0	77	0	92	79	0	17	33	3	2
156	KD023	ARF-null	TCF3::ZNF384 e13-e5 CHA (-e8)	10	500000	TVI unsorted	279	Immunophenotype of all singlets	1	1	0	0	0	0	30	84	0	5	5	0	12						GFP negative B-cell leukemia
157	KD023	ARF-null	TCF3::ZNF384 e13-e5 CHA (-e8)	10	500000	TVI unsorted	121	Found dead
158	KD023	ARF-null	TCF3::ZNF384 e13-e5 CHA (-e8)	10	500000	TVI unsorted	129	Immunophenotype of all singlets	3	0	0	2	1	0	49	41	37	6	15	8	12
159	KD023	ARF-null	TCF3::ZNF384 e13-e5 CHA (-e8)	10	500000	TVI unsorted	115	Immunophenotype of all singlets	0	0	0	0	0	0	39	26	11	56	61	18	3
160	KD023	ARF-null	TCF3::ZNF384 e13-e5 CHA (-e8)	10	500000	TVI unsorted	171	Immunophenotype of all singlets	2	1	0	0	0	0	19	15	6	47	50	3	1
165	KD023	ARF-null	TCF3::ZNF384 e13-e5 CHA (+e8)	61	500000	TVI unsorted	235	Immunophenotype of all singlets	1	0	0	2	0	0	9	0	4	86	88	4	1						GFP negative B-cell lymphoblastic lymphoma
171	KD023	ARF-null	NRAS G12D and TCF3::ZNF384 e13-e5 CHA (-e8)	2	400000	TVI unsorted	20		23	32	22	83	85	78	14	0	0	84	88	1	1	8635	1.29705	2.32774	0.0694847	0.0231616	Myelomonocytic leukemia	No	2e5 sorted, TVI	Yes	Yes
172	KD023	ARF-null	NRAS G12D and TCF3::ZNF384 e13-e5 CHA (-e8)	2	400000	TVI unsorted	40		47	39	31	96	95	94	6	0	0	89	63	0	1							Yes	4e5 unsorted, TVI	Yes	Yes
173	KD023	ARF-null	NRAS G12D and TCF3::ZNF384 e13-e5 CHA (-e8)	2	400000	TVI unsorted	48		22	25	19	87	86	85	13	0	0	93	66	1	1									Yes	Yes
174	KD023	ARF-null	NRAS G12D and TCF3::ZNF384 e13-e5 CHA (-e8)	2	400000	TVI unsorted	20		33	44	31	80	83	77	12	0	0	88	67	1	1									Yes	Yes
175	KD023	ARF-null	NRAS G12D and TCF3::ZNF384 e13-e5 CHA (-e8)	2	400000	TVI unsorted	20	Found dead
176	KD023	ARF-null	NRAS G12D and TCF3::ZNF384 e13-e5 CHA (-e8)	2	400000	TVI unsorted	42		13	64	13	3	21	2	41	5	1	53	47	6	7
177	KD023	ARF-null	NRAS G12D and TCF3::ZNF384 e13-e5 CHA (-e8)	2	400000	TVI unsorted	29		32	47	30	75	79	73	11	0	0	94	70	1	2						Myeloid leukemia
178	KD023	ARF-null	NRAS G12D and TCF3::ZNF384 e13-e5 CHA (+e8)	8	400000	TVI unsorted	22		55	58	51	94	85	83	14	0	0	88	98	1	0	2577	0.620877	5.58789	0.97012	0	Myeloid leukemia	No	2e5 sorted, TVI
179	KD023	ARF-null	NRAS G12D and TCF3::ZNF384 e13-e5 CHA (+e8)	8	400000	TVI unsorted	22		42	40	34	91	87	83	17	1	0	93	94	1	1									Yes	Yes
180	KD023	ARF-null	NRAS G12D and TCF3::ZNF384 e13-e5 CHA (+e8)	8	400000	TVI unsorted	15		42	37	32	63	54	52	34	1	0	81	91	3	6
181	KD023	ARF-null	NRAS G12D and TCF3::ZNF384 e13-e5 CHA (+e8)	8	400000	TVI unsorted	25		71	72	67	96	95	94	23	0	0	93	97	1	1						Myeloid leukemia	No	4e5 unsorted, TVI	Yes	Yes
182	KD023	ARF-null	NRAS G12D and TCF3::ZNF384 e13-e5 CHA (+e8)	8	400000	TVI unsorted	25		60	70	58	96	96	95	19	0	0	97	95	1	1									Yes	Yes
183	KD023	ARF-null	NRAS G12D and TCF3::ZNF384 e13-e5 CHA (+e8)	8	400000	TVI unsorted	42		62	59	57	90	82	82	24	0	0	96	96	5	1
184	KD023	ARF-null	NRAS G12D and TCF3::ZNF384 e13-e5 CHA (+e8)	8	400000	TVI unsorted	48		27	28	24	58	52	50	14	0	0	62	58	2	2

## Sheet: ST5
Supplemental Table 5. WES called mutations.
Group	Sample	VAF	SNP	Location	Type	Annotation
EP300::ZNF384	522_BM_KD025	0.4573	NA	splicing	splicing	Ntn4(NM_021320:exon3:c.586-2A>G)
EP300::ZNF384	522_BM_KD025	0.3421	NA	exonic	nonsynonymous SNV	Esyt1:NM_011843:exon1:c.C104T:p.P35L
EP300::ZNF384	522_BM_KD025	0.468	NA	exonic	nonsynonymous SNV	Cebpe:NM_207131:exon2:c.G632A:p.R211H
EP300::ZNF384	522_BM_KD025	0.478	NA	exonic	stopgain	Farp1:NM_134082:exon4:c.C316T:p.R106X
EP300::ZNF384	522_BM_KD025	0.4922	NA	exonic	frameshift insertion	Nop14:NM_029278:exon16:c.2314dupC:p.R772fs
EP300::ZNF384	522_BM_KD025	0.2105	NA	exonic	nonsynonymous SNV	Slit2:NM_178804:exon32:c.G3668A:p.S1223N
EP300::ZNF384	522_BM_KD025	0.2027	NA	exonic	nonsynonymous SNV	Grid2:NM_001370966:exon14:c.G2212A:p.A738T
EP300::ZNF384	522_BM_KD025	0.4353	NA	exonic	nonsynonymous SNV	Olfr615:NM_147080:exon1:c.C824A:p.A275E
EP300::ZNF384	522_BM_KD025	0.2979	NA	exonic	nonsynonymous SNV	Eif3f:NM_025344:exon7:c.G910A:p.A304T,
EP300::ZNF384	522_BM_KD025	0.5402	NA	exonic	nonsynonymous SNV	Pstk:NM_001364161:exon3:c.G601A:p.E201K,
EP300::ZNF384	82_BM_KD025	0.4427	NA	splicing	splicing	Ntn4(NM_021320:exon3:c.586-2A>G)
EP300::ZNF384	82_BM_KD025	0.4952	NA	exonic	nonsynonymous SNV	Cebpe:NM_207131:exon2:c.G632A:p.R211H,
EP300::ZNF384	82_BM_KD025	0.4615	NA	exonic	nonsynonymous SNV	C1qtnf6:NM_028331:exon3:c.G742A:p.V248M,
EP300::ZNF384	82_BM_KD025	0.1123	NA	exonic	nonsynonymous SNV	Scn7a:NM_009135:exon14:c.G1828A:p.G610R,
EP300::ZNF384	82_BM_KD025	0.4553	NA	exonic	frameshift insertion	Nop14:NM_029278:exon16:c.2314dupC:p.R772fs,
EP300::ZNF384	82_BM_KD025	0.25	NA	exonic	nonsynonymous SNV	Caprin2:NM_181541:exon14:c.G1935T:p.K645N,
EP300::ZNF384	82_BM_KD025	0.1109	NA	exonic	frameshift deletion	Vmn1r125:NM_001166740:exon1:c.25delA:p.K9fs,
EP300::ZNF384	82_BM_KD025	0.1698	NA	exonic	nonsynonymous SNV	Vsig10l:NM_001290316:exon7:c.A1738C:p.T580P
EP300::ZNF384	82_BM_KD025	0.5018	NA	exonic	nonsynonymous SNV	Olfr615:NM_147080:exon1:c.C824A:p.A275E,
EP300::ZNF384	82_BM_KD025	0.2133	NA	exonic	nonsynonymous SNV	Olfr471:NM_001370872:exon2:c.C872T:p.S291L,
EP300::ZNF384	82_BM_KD025	0.5472	NA	exonic	nonsynonymous SNV	Pstk:NM_001364161:exon3:c.G601A:p.E201K,
EP300::ZNF384	82_BM_KD025	0.2468	NA	exonic	nonsynonymous SNV	Urb2:NM_001029876:exon4:c.G545A:p.R182K,
EP300::ZNF384	2710_SPL_KD025	0.109	NA	exonic	missense	Col6a2:NM_001347207:exon11:c.C1057T:p.R353C
EP300::ZNF384	2710_SPL_KD025	0.2775	NA	exonic	nonsense	Farp1:NM_134082:exon4:c.C316T:p.R106X,
EP300::ZNF384	2710_SPL_KD025	0.4216	NA	exonic	fs_ins	Nop14:NM_029278:exon16:c.2314dupC:p.R772fs,
EP300::ZNF384	2710_SPL_KD025	0.4826	NA	splicing	splicing	Ntn4(NM_021320:exon3:c.586-2A>G)
EP300::ZNF384	2710_SPL_KD025	0.4353	NA	exonic	missense	Olfr615:NM_147080:exon1:c.C824A:p.A275E,
EP300::ZNF384	2710_SPL_KD025	0.4486	NA	exonic	missense	Pstk:NM_001364161:exon3:c.G601A:p.E201K
EP300::ZNF384	2710_SPL_KD025	0.1657	NA	exonic	fs_del	Ryr2:NM_023868:exon99:c.14214delT:p.F4738fs,
EP300::ZNF384	2710_SPL_KD025	0.1603	NA	exonic	missense	Syde1:NM_027875:exon3:c.C476T:p.S159F,
EP300::ZNF384	523_SPL_KD025	0.352	NA	exonic	nonsense	Farp1:NM_134082:exon4:c.C316T:p.R106X,
EP300::ZNF384	523_SPL_KD025	0.2206	NA	splicing	splicing	Grik1:NM_010348:exon14:c.2311+2T>G
EP300::ZNF384	523_SPL_KD025	0.3283	NA	exonic	nonsense	Nav2:NM_001111016:exon2:c.C31T:p.Q11X,
EP300::ZNF384	523_SPL_KD025	0.3441	NA	exonic	fs_ins	Nop14:NM_029278:exon16:c.2314dupC:p.R772fs,
EP300::ZNF384	523_SPL_KD025	0.5486	NA	splicing	splicing	Ntn4(NM_021320:exon3:c.586-2A>G)
EP300::ZNF384	523_SPL_KD025	0.4691	NA	exonic	missense	Olfr615:NM_147080:exon1:c.C824A:p.A275E,
EP300::ZNF384	523_SPL_KD025	0.4514	NA	exonic	missense	Pstk:NM_001364161:exon3:c.G601A:p.E201K
EP300::ZNF384, NRAS G12D	515_SPL_KD025	0.4471	NA	splicing	splicing	Ntn4(NM_021320:exon3:c.586-2A>G)
EP300::ZNF384, NRAS G12D	515_SPL_KD025	0.4065	NA	exonic	nonsynonymous SNV	St6galnac1:NM_011371:exon5:c.G965A:p.G322E,
EP300::ZNF384, NRAS G12D	515_SPL_KD025	0.3649	NA	exonic	nonframeshift insertion	Cebpe:NM_207131:exon2:c.693_694insGAG:p.T232delinsET,
EP300::ZNF384, NRAS G12D	515_SPL_KD025	0.1119	NA	exonic	nonsynonymous SNV	Nefm:NM_008691:exon1:c.C632T:p.S211L,
EP300::ZNF384, NRAS G12D	515_SPL_KD025	0.4097	NA	exonic	nonsynonymous SNV	Krt73:NM_212485:exon6:c.C1009T:p.R337W,
EP300::ZNF384, NRAS G12D	515_SPL_KD025	0.4976	NA	exonic	nonsynonymous SNV	Ptprm:NM_008984:exon15:c.G2374T:p.D792Y
EP300::ZNF384, NRAS G12D	515_SPL_KD025	0.38	NA	exonic	frameshift insertion	Nop14:NM_029278:exon16:c.2314dupC:p.R772fs,
EP300::ZNF384, NRAS G12D	515_SPL_KD025	0.532	NA	exonic	nonsynonymous SNV	Ano5:NM_177694:exon21:c.A2399G:p.Y800C
EP300::ZNF384, NRAS G12D	515_SPL_KD025	0.4531	NA	exonic	nonsynonymous SNV	Pstk:NM_001364161:exon3:c.G601A:p.E201K,
EP300::ZNF384, NRAS G12D	2714_SPL_KD025	0.5087	NA	exonic	missense	Ano5:NM_001271879:exon20:c.A2249G:p.Y750C
EP300::ZNF384, NRAS G12D	2714_SPL_KD025	0.4545	NA	exonic	fs_ins	Nop14:NM_029278:exon16:c.2314dupC:p.R772fs,
EP300::ZNF384, NRAS G12D	2714_SPL_KD025	0.4535	NA	splicing	splicing	Ntn4(NM_021320:exon3:c.586-2A>G)
EP300::ZNF384, NRAS G12D	2714_SPL_KD025	0.4638	NA	exonic	missense	Pstk:NM_001364161:exon3:c.G601A:p.E201K
EP300::ZNF384, NRAS G12D	2714_SPL_KD025	0.2518	NA	exonic	missense	St6galnac1:NM_011371:exon5:c.G965A:p.G322E,
NRAS G12D	67_SPL_KD029	0.2609	NA	exonic	missense	Adam32:NM_001293693:exon17:c.G1912A:p.G638R
NRAS G12D	67_SPL_KD029	0.2842	NA	exonic	missense	Bop1:NM_013481:exon7:c.?:p.E305A
NRAS G12D	67_SPL_KD029	0.1751	NA	exonic	missense	Filip1:NM_001357354:exon2:c.A141T:p.K47N
NRAS G12D	67_SPL_KD029	0.2882	NA	exonic	missense	Fnbp1l:NM_153118:exon11:c.C1210G:p.R404G
NRAS G12D	67_SPL_KD029	0.1991	NA	exonic	missense	Gm7429:NM_001370953:exon1:c.?:p.A84V
NRAS G12D	67_SPL_KD029	0.6833	NA	exonic	missense	Gripap1:NM_001290455:exon5:c.G291A:p.M97I
NRAS G12D	67_SPL_KD029	0.1659	NA	exonic	missense	Ikzf1:NM_001301868:exon4:c.G354T:p.K118N
NRAS G12D	67_SPL_KD029	0.1081	NA	exonic	missense	Ikzf1:NM_001301866:exon4:c.T218C:p.L73P
NRAS G12D	67_SPL_KD029	0.125	NA	exonic	missense	Kcnk15:NM_001030292:exon1:c.A227C:p.D76A,
NRAS G12D	67_SPL_KD029	0.1134	NA	exonic	missense	Klhdc8a:NM_144810:exon4:c.C806A:p.A269E,
NRAS G12D	67_SPL_KD029	0.5873	NA	exonic	fs_ins	Notch1:NM_008714:exon34:c.7194_7195insACCGA:p.A2399fs,
NRAS G12D	67_SPL_KD029	0.1184	NA	exonic	fs_ins	Notch1:NM_008714:exon34:c.7082_7083insTTTT:p.R2361fs,
NRAS G12D	67_SPL_KD029	0.1239	NA	exonic	missense	Pla2g4b:NM_145378:exon11:c.C854A:p.A285E,
NRAS G12D	67_SPL_KD029	0.1463	NA	exonic	missense	Rag2:NM_009020:exon3:c.T829G:p.Y277D,
NRAS G12D	67_SPL_KD029	0.3098	NA	exonic	missense	Speer4e:NM_001122661:exon2:c.G263A:p.R88H,
TCF3::ZNF384 +e8, NRAS G12D	66_SPL_KD022	0.4658	NA	exonic	missense	Dkk3:NM_001360261:exon6:c.T605A:p.V202E,
TCF3::ZNF384 +e8, NRAS G12D	66_SPL_KD022	0.6765	NA	splicing	splicing	Dnase1l1(NM_001172154:exon2:c.138+1G>A
TCF3::ZNF384 +e8, NRAS G12D	68_SPL_KD022	0.292	NA	exonic	missense	Aox3:NM_023617:exon12:c.C1090T:p.P364S,
TCF3::ZNF384 +e8, NRAS G12D	68_SPL_KD022	0.1484	NA	exonic	missense	Casr:NM_013803:exon4:c.A734C:p.Q245P,
TCF3::ZNF384 +e8, NRAS G12D	68_SPL_KD022	0.1286	NA	exonic	missense	Fam120a:NM_001033268:exon11:c.?:p.D696A
TCF3::ZNF384 +e8, NRAS G12D	68_SPL_KD022	0.2041	NA	exonic	missense	Nckap1l:NM_153505:exon18:c.A1823C:p.Q608P,
TCF3::ZNF384 +e8, NRAS G12D	68_SPL_KD022	0.1902	NA	exonic	missense	Slc26a10:NM_177615:exon7::c.?:p.Q341P
TCF3::ZNF384 +e8, NRAS G12D	75_SPL_KD022	0.2795	NA	exonic	inframe_ins	Ano6:NM_175344:exon12:c.1376_1377insCGT:p.A459delinsAV,
TCF3::ZNF384 +e8, NRAS G12D	75_SPL_KD022	0.3538	NA	exonic	missense	Dkk3:NM_001360261:exon6:c.T605A:p.V202E,
TCF3::ZNF384 +e8, NRAS G12D	75_SPL_KD022	0.7571	NA	splicing	splicing	Dnase1l1(NM_001172154:exon2:c.138+1G>A
TCF3::ZNF384 -e8, NRAS G12D	1718_SPL_KD018	0.4302	NA	exonic	missense	Atp9a:NM_001289445:exon16:c.G1666A:p.V556I,
TCF3::ZNF384 -e8, NRAS G12D	1718_SPL_KD018	0.5204	NA	exonic	missense	Cbx5:NM_001358950:exon3:c.C241T:p.P81S,
TCF3::ZNF384 -e8, NRAS G12D	1718_SPL_KD018	0.4091	NA	exonic	missense	Cdc16:NM_027276:exon1:c.G32T:p.R11L,
TCF3::ZNF384 -e8, NRAS G12D	1718_SPL_KD018	0.4615	NA	splicing	splicing	Dnase1l1(NM_001172154:exon2:c.138+1G>A
TCF3::ZNF384 -e8, NRAS G12D	1718_SPL_KD018	0.4693	NA	exonic	missense	Fgf18:NM_008005:exon3:c.G158A:p.R53H,
TCF3::ZNF384 -e8, NRAS G12D	1718_SPL_KD018	0.1392	NA	exonic	missense	Olfr921:NM_146782:exon3:c.C794A:p.A265D,
TCF3::ZNF384 -e8, NRAS G12D	1718_SPL_KD018	0.4424	NA	exonic	missense	Ppat:NM_172146:exon5:c.A523C:p.N175H,
TCF3::ZNF384 -e8, NRAS G12D	1723_SPL_KD019	0.2981	NA	exonic	missense	Atp6v0d2:NM_175406:exon3:c.A372C:p.E124D,
TCF3::ZNF384 -e8, NRAS G12D	1723_SPL_KD019	0.3902	NA	exonic	missense	Clock:NM_007715:exon16:c.G1232A:p.R411H
TCF3::ZNF384 -e8, NRAS G12D	1723_SPL_KD019	0.1212	NA	splicing	splicing	Dnase1l1(NM_001172154:exon2:c.138+1G>A,
TCF3::ZNF384 -e8, NRAS G12D	1723_SPL_KD019	0.1384	NA	exonic	missense	Ecm2:NM_001012324:exon3:c.A419C:p.Y140S,
TCF3::ZNF384 -e8, NRAS G12D	1723_SPL_KD019	0.3077	NA	exonic	fs_ins	Olfr883:NM_146419:exon1:c.733_734insTTGCTGT:p.I245fs,
TCF3::ZNF384 -e8, NRAS G12D	1723_SPL_KD019	0.6923	NA	exonic	fs_ins	Rgl2:NM_009059:exon2:c.38dupC:p.T13fs,
TCF3::ZNF384 -e8, NRAS G12D	1723_SPL_KD019	0.3426	NA	exonic	missense	Scnm1:NM_027013:exon6:c.A469G:p.I157V,
TCF3::ZNF384 -e8, NRAS G12D	1723_SPL_KD019	0.3721	NA	exonic	missense	Sdf2l1:NM_022324:exon1:c.G17C:p.R6P,
TCF3::ZNF384 -e8, NRAS G12D	1723_SPL_KD019	0.2841	NA	exonic	missense	Wdr20:NM_001364272:exon4:c.C425G:p.T142S
TCF3::ZNF384 -e8, NRAS G12D	3871_SPL_KD020	0.373	NA	exonic	missense	Atp6v0d2:NM_175406:exon3:c.A372C:p.E124D,
TCF3::ZNF384 -e8, NRAS G12D	3871_SPL_KD020	0.3397	NA	exonic	missense	Ces3a:NM_198672:exon2:c.G261T:p.W87C,
TCF3::ZNF384 -e8, NRAS G12D	3871_SPL_KD020	0.3796	NA	exonic	missense	Clock:NM_007715:exon16:c.G1232A:p.R411H,
TCF3::ZNF384 -e8, NRAS G12D	3871_SPL_KD020	0.3882	NA	exonic	missense	Ints12:NM_027927:exon2:c.G130A:p.D44N,
TCF3::ZNF384 -e8, NRAS G12D	3871_SPL_KD020	0.6569	NA	exonic	missense	Kdm5c:NM_013668:exon15:c.C2113T:p.R705C,
TCF3::ZNF384 -e8, NRAS G12D	3871_SPL_KD020	0.3624	NA	exonic	fs_ins	Olfr883:NM_146419:exon1:c.733_734insTTGCTGT:p.I245fs,
TCF3::ZNF384 -e8, NRAS G12D	3871_SPL_KD020	0.2667	NA	exonic	fs_ins	Rgl2:NM_009059:exon2:c.38dupC:p.T13fs,
TCF3::ZNF384 -e8, NRAS G12D	3871_SPL_KD020	0.3265	NA	exonic	missense	Scnm1:NM_027013:exon6:c.A469G:p.I157V,
TCF3::ZNF384 -e8, NRAS G12D	3871_SPL_KD020	0.4516	NA	exonic	missense	Sdf2l1:NM_022324:exon1:c.G17C:p.R6P,
TCF3::ZNF384 -e8, NRAS G12D	3871_SPL_KD020	0.095	NA	exonic	missense	Slit2:NM_178804:exon13:c.G1163A:p.R388Q,
TCF3::ZNF384 -e8, NRAS G12D	3871_SPL_KD020	0.3684	NA	exonic	missense	Wdr20:NM_001364272:exon4:c.C425G:p.T142S,
TCF3::ZNF384 -e8, NRAS G12D	996_SPL_KD021	0.4667	NA	exonic	inframe_del	Alas1:NM_020559:exon10:c.1762_1764del:p.588_588del,
TCF3::ZNF384 -e8, NRAS G12D	996_SPL_KD021	0.4231	NA	exonic	missense	Bmpr2:NM_007561:exon6:c.C803A:p.T268N,
TCF3::ZNF384 -e8, NRAS G12D	996_SPL_KD021	0.4232	NA	exonic	missense	Clock:NM_007715:exon16:c.G1232A:p.R411H,
TCF3::ZNF384 -e8, NRAS G12D	996_SPL_KD021	0.4615	NA	exonic	missense	Dpf3:NM_058212:exon2:c.T85G:p.S29A,
TCF3::ZNF384 -e8, NRAS G12D	996_SPL_KD021	0.4832	NA	exonic	missense	Hmbox1:NM_001347627:exon10:c.G1135T:p.A379S,
TCF3::ZNF384 -e8, NRAS G12D	996_SPL_KD021	0.4282	NA	exonic	fs_del	Mrgprb8:NM_207539:exon1:c.461delT:p.V154fs,
TCF3::ZNF384 -e8, NRAS G12D	996_SPL_KD021	0.3101	NA	exonic	fs_ins	Olfr883:NM_146419:exon1:c.733_734insTTGCTGT:p.I245fs,
TCF3::ZNF384 -e8, NRAS G12D	996_SPL_KD021	0.4146	NA	exonic	missense	Patz1:NM_001253690:exon3:c.G1505A:p.R502Q,
TCF3::ZNF384 -e8, NRAS G12D	996_SPL_KD021	0.4643	NA	exonic	fs_ins	Rgl2:NM_009059:exon2:c.38dupC:p.T13fs,
TCF3::ZNF384 -e8, NRAS G12D	996_SPL_KD021	0.5306	NA	exonic	missense	Scgb2b2:NM_207262:exon3:c.A314G:p.K105R,
TCF3::ZNF384 -e8, NRAS G12D	996_SPL_KD021	0.4124	NA	exonic	missense	Scnm1:NM_027013:exon6:c.A469G:p.I157V,
TCF3::ZNF384 -e8, NRAS G12D	996_SPL_KD021	0.6154	NA	exonic	missense	Sdf2l1:NM_022324:exon1:c.G17C:p.R6P,
TCF3::ZNF384 -e8, NRAS G12D	996_SPL_KD021	0.475	NA	exonic	missense	Slit2:NM_178804:exon13:c.G1163A:p.R388Q
TCF3::ZNF384 -e8, NRAS G12D	996_SPL_KD021	0.1421	NA	exonic	nonsense	Vmn1r20:NM_001101533:exon1:c.T771G:p.Y257X,
TCF3::ZNF384 -e8, NRAS G12D	62_SPL_KD022	0.505	NA	exonic	missense	Adamts13:NM_001290465:exon19:c.C2533T:p.R845C
TCF3::ZNF384 -e8, NRAS G12D	62_SPL_KD022	0.4749	NA	exonic	missense	Fam135a:NM_026604:exon19:c.C4165T:p.R1389C,
TCF3::ZNF384 -e8, NRAS G12D	62_SPL_KD022	0.5024	NA	exonic	missense	Gabrg3:NM_008074:exon5:c.C545T:p.A182V,
TCF3::ZNF384 -e8, NRAS G12D	62_SPL_KD022	0.457	NA	exonic	missense	Ift140:NM_134126:exon10:c.T1346C:p.V449A,
TCF3::ZNF384 -e8, NRAS G12D	62_SPL_KD022	0.1935	NA	exonic	missense	Inpp5d:NM_010566:exon25:c.A2944C:p.N982H
TCF3::ZNF384 -e8, NRAS G12D	62_SPL_KD022	0.5109	NA	exonic	missense	Msrb3:NM_177092:exon7:c.C411A:p.H137Q,
TCF3::ZNF384 -e8, NRAS G12D	62_SPL_KD022	0.1961	NA	exonic	missense	Nckap1l:NM_153505:exon18:c.A1823C:p.Q608P,
TCF3::ZNF384 -e8, NRAS G12D	62_SPL_KD022	0.5	NA	exonic	missense	Zbtb42:NM_001100460:exon2:c.G841C:p.D281H,
TCF3::ZNF384 -e8, NRAS G12D	80_SPL_KD022	0.4167	NA	exonic	missense	Cnot11:NM_028043:exon4:c.C995T:p.P332L,
TCF3::ZNF384 -e8, NRAS G12D	80_SPL_KD022	0.2883	NA	exonic	fs_del	Erc1:NM_053204:exon5:c.1112_1116del:p.A371fs
TCF3::ZNF384 -e8, NRAS G12D	80_SPL_KD022	0.4343	NA	exonic	missense	Ldb2:NM_001359071:exon1:c.T28A:p.Y10N
TCF3::ZNF384 -e8, NRAS G12D	80_SPL_KD022	0.0872	NA	exonic	missense	Morc2b:NM_001360203:exon3:c.T1102G:p.F368V
TCF3::ZNF384 -e8, NRAS G12D	80_SPL_KD022	0.178	rs233351593:0	exonic	missense	Naip1:NM_008670:exon12:c.T3276A:p.D1092E,
TCF3::ZNF384 -e8, NRAS G12D	80_SPL_KD022	0.3143	NA	exonic	missense	Sorbs1:NM_178362:exon7:c.C538G:p.R180G,
TCF3::ZNF384 -e8, NRAS G12D	80_SPL_KD022	0.3264	NA	exonic	missense	Tas1r3:NM_031872:exon2:c.T323C:p.V108A,
TCF3::ZNF384 -e8, NRAS G12D	80_SPL_KD022	0.4296	NA	exonic	missense	Tgfbr1:NM_001312868:exon3:c.C355T:p.P119S
TCF3::ZNF384 -e8, NRAS G12D	80_SPL_KD022	0.3678	NA	exonic	missense	Vps13c:NM_177184:exon33:c.C3421A:p.H1141N,
TCF3::ZNF384-e8,NRAS G12D	65_BM_KD022	0.2989	NA	exonic	missense	Adamts13:NM_001290465:exon19:c.C2533T:p.R845C,
TCF3::ZNF384-e8,NRAS G12D	65_BM_KD022	0.2123	NA	exonic	missense	Alpk2:NM_001037294:exon5:c.A3920C:p.Q1307P,
TCF3::ZNF384-e8,NRAS G12D	65_BM_KD022	0.276	NA	exonic	missense	Fam135a:NM_026604:exon19:c.C4165T:p.R1389C,
TCF3::ZNF384-e8,NRAS G12D	65_BM_KD022	0.2376	NA	exonic	missense	Fbn2:NM_010181:exon57:c.A7120C:p.N2374H,
TCF3::ZNF384-e8,NRAS G12D	65_BM_KD022	0.3043	NA	exonic	missense	Ift140:NM_134126:exon10:c.T1346C:p.V449A,
ARF-/-,TCF3::ZNF384 +e8, NRAS G12D	182_BM_KD023	0.9818	NA	exonic	missense	4833420G17Rik:NM_001113550:exon9:c.C1451A:p.T484K
ARF-/-,TCF3::ZNF384 +e8, NRAS G12D	182_BM_KD023	1	rs262569844:0	exonic	missense	Adamts3:NM_001081401:exon4:c.G595A:p.V199I,
ARF-/-,TCF3::ZNF384 +e8, NRAS G12D	182_BM_KD023	1	NA	exonic	missense	Adcy5:NM_001012765:exon15:c.G2770A:p.V924M,
ARF-/-,TCF3::ZNF384 +e8, NRAS G12D	182_BM_KD023	1	NA	exonic	missense	Amotl2:NM_019764:exon2:c.C297G:p.S99R,
ARF-/-,TCF3::ZNF384 +e8, NRAS G12D	182_BM_KD023	0.793	NA	exonic	missense	Bmpr2:NM_007561:exon7:c.G962A:p.R321Q,
ARF-/-,TCF3::ZNF384 +e8, NRAS G12D	182_BM_KD023	1	NA	exonic	missense	Casz1:NM_027195:exon16:c.T3260C:p.L1087P,
ARF-/-,TCF3::ZNF384 +e8, NRAS G12D	182_BM_KD023	1	NA	exonic	missense	Ccnl1:NM_001355432:exon11:c.G739T:p.D247Y,
ARF-/-,TCF3::ZNF384 +e8, NRAS G12D	182_BM_KD023	0.929	NA	exonic	fs_del	Cilp:NM_001364527:exon11:c.3210delG:p.M1070fs,
ARF-/-,TCF3::ZNF384 +e8, NRAS G12D	182_BM_KD023	0.25	NA	exonic	missense	Cited2:NM_010828:exon2:c.C407A:p.P136Q,
ARF-/-,TCF3::ZNF384 +e8, NRAS G12D	182_BM_KD023	1	rs46190260:0	exonic	missense	Cmya5:NM_023821:exon9:c.G10240C:p.A3414P,
ARF-/-,TCF3::ZNF384 +e8, NRAS G12D	182_BM_KD023	0.9779	NA	exonic	fs_del	Crb1:NM_133239:exon9:c.3481delC:p.R1161fs,
ARF-/-,TCF3::ZNF384 +e8, NRAS G12D	182_BM_KD023	1	NA	exonic	missense	Cyfip2:NM_133769:exon25:c.C2903T:p.S968F,
ARF-/-,TCF3::ZNF384 +e8, NRAS G12D	182_BM_KD023	0.3168	rs248157600:0	exonic	missense	Fam160b2:NM_194345:exon14:c.C1725A:p.S575R,
ARF-/-,TCF3::ZNF384 +e8, NRAS G12D	182_BM_KD023	0.692	NA	exonic	missense	Fat1:NM_001081286:exon9:c.G7076T:p.R2359M,
ARF-/-,TCF3::ZNF384 +e8, NRAS G12D	182_BM_KD023	0.1953	NA	exonic	missense	Fbxw21:NM_177069:exon7:c.A914G:p.H305R,
ARF-/-,TCF3::ZNF384 +e8, NRAS G12D	182_BM_KD023	0.9955	NA	exonic	missense	Fras1:NM_175473:exon62:c.T9404C:p.L3135P,
ARF-/-,TCF3::ZNF384 +e8, NRAS G12D	182_BM_KD023	0.4643	rs585222029:0	exonic	missense	Gm10324:NM_001177832:exon4:c.A1373G:p.K458R,
ARF-/-,TCF3::ZNF384 +e8, NRAS G12D	182_BM_KD023	1	rs50213431:0	exonic	missense	Gm9805:NM_001362121:exon5:c.?:p.Y376C
ARF-/-,TCF3::ZNF384 +e8, NRAS G12D	182_BM_KD023	0.3939	NA	exonic	missense	Guca1a:NM_008189:exon1:c.A10G:p.I4V,
ARF-/-,TCF3::ZNF384 +e8, NRAS G12D	182_BM_KD023	1	NA	exonic	missense	Herc2:NM_001360080:exon24:c.G3704A:p.G1235D,
ARF-/-,TCF3::ZNF384 +e8, NRAS G12D	182_BM_KD023	0.2364	NA	exonic	missense	Hmgxb4:NM_178017:exon3:c.C146T:p.A49V,
ARF-/-,TCF3::ZNF384 +e8, NRAS G12D	182_BM_KD023	0.3184	NA	exonic	fs_del	Hmgxb4:NM_001316753:exon6:c.303delT:p.A101fs
ARF-/-,TCF3::ZNF384 +e8, NRAS G12D	182_BM_KD023	0.1805	NA	exonic	missense	Hmgxb4:NM_001316753:exon10:c.G1135A:p.V379I,
ARF-/-,TCF3::ZNF384 +e8, NRAS G12D	182_BM_KD023	1	NA	exonic	missense	Irx2:NM_010574:exon2:c.?:p.I153T
ARF-/-,TCF3::ZNF384 +e8, NRAS G12D	182_BM_KD023	0.2751	rs51622160:0	exonic	missense	Itga6:NM_001277970:exon25:c.A3151G:p.I1051V,
ARF-/-,TCF3::ZNF384 +e8, NRAS G12D	182_BM_KD023	1	NA	exonic	missense	Lama1:NM_008480:exon14:c.G1966A:p.D656N,
ARF-/-,TCF3::ZNF384 +e8, NRAS G12D	182_BM_KD023	1	NA	exonic	missense	Lrrc19:NM_175305:exon4:c.A715G:p.T239A
ARF-/-,TCF3::ZNF384 +e8, NRAS G12D	182_BM_KD023	0.2778	NA	splicing	splicing	Mettl3(NM_019721:exon8:c.1344-1->CA)
ARF-/-,TCF3::ZNF384 +e8, NRAS G12D	182_BM_KD023	0.2871	NA	exonic	missense	Mkrn1:NM_018810:exon6:c.A1036T:p.N346Y
ARF-/-,TCF3::ZNF384 +e8, NRAS G12D	182_BM_KD023	0.2849	NA	splicing	splicing	Myh6(NM_001164171:exon30:c.4176-2->TGC,
ARF-/-,TCF3::ZNF384 +e8, NRAS G12D	182_BM_KD023	1	rs229712565:0	exonic	missense	Myo18b:NM_028901:exon36:c.G5804A:p.R1935H,
ARF-/-,TCF3::ZNF384 +e8, NRAS G12D	182_BM_KD023	0.9951	NA	exonic	missense	Myo5a:NM_010864:exon38:c.C5113T:p.R1705C,
ARF-/-,TCF3::ZNF384 +e8, NRAS G12D	182_BM_KD023	1	rs50934341:0	exonic	missense	Ndufs6:NM_010888:exon1:c.T11C:p.V4A,
ARF-/-,TCF3::ZNF384 +e8, NRAS G12D	182_BM_KD023	1	NA	exonic	missense	Nlrp12:NM_001033431:exon10:c.A3101G:p.K1034R,
ARF-/-,TCF3::ZNF384 +e8, NRAS G12D	182_BM_KD023	0.9887	NA	exonic	missense	Obsl1:NM_178884:exon19:c.C5291T:p.T1764M,
ARF-/-,TCF3::ZNF384 +e8, NRAS G12D	182_BM_KD023	0.4884	NA	exonic	missense	Ostf1:NM_017375:exon9:c.G490A:p.A164T,
ARF-/-,TCF3::ZNF384 +e8, NRAS G12D	182_BM_KD023	1	rs225419060:0	exonic	missense	Padi3:NM_011060:exon6:c.T578C:p.L193P,
ARF-/-,TCF3::ZNF384 +e8, NRAS G12D	182_BM_KD023	0.3106	NA	exonic	missense	Pkd2l1:NM_181422:exon3:c.C453G:p.I151M,
ARF-/-,TCF3::ZNF384 +e8, NRAS G12D	182_BM_KD023	1	NA	exonic	missense	Pmch:NM_029971:exon2:c.T395C:p.I132T,
ARF-/-,TCF3::ZNF384 +e8, NRAS G12D	182_BM_KD023	1	rs13460207:0	exonic	missense	Pinsr:NM_025669:exon11:c.?:p.R476G
ARF-/-,TCF3::ZNF384 +e8, NRAS G12D	182_BM_KD023	0.2621	NA	exonic	missense	Rgsl1:NM_001243223:exon20:c.G3193A:p.D1065N,
ARF-/-,TCF3::ZNF384 +e8, NRAS G12D	182_BM_KD023	1	rs50751634:0	exonic	missense	Slc15a2:NM_001145899:exon6:c.T629C:p.M210T,
ARF-/-,TCF3::ZNF384 +e8, NRAS G12D	182_BM_KD023	0.1881	NA	exonic	missense	Smarcd3:NM_025891:exon6:c.A661C:p.N221H,
ARF-/-,TCF3::ZNF384 +e8, NRAS G12D	182_BM_KD023	0.5769	rs230596409:0	exonic	nonsense	Spata31:NM_030047:exon3:c.C1933T:p.R645X,
ARF-/-,TCF3::ZNF384 +e8, NRAS G12D	182_BM_KD023	1	NA	exonic	missense	Sspn:NM_010656:exon3:c.C367T:p.L123F,
ARF-/-,TCF3::ZNF384 +e8, NRAS G12D	182_BM_KD023	1	rs238893157:0	exonic	missense	Stxbp4:NM_011505:exon18:c.G1603A:p.A535T,
ARF-/-,TCF3::ZNF384 +e8, NRAS G12D	182_BM_KD023	0.4684	NA	exonic	missense	Sulf1:NM_001198566:exon14:c.G1918A:p.D640N
ARF-/-,TCF3::ZNF384 +e8, NRAS G12D	182_BM_KD023	0.5135	NA	exonic	fs_del	Timm8a2:NM_001037744:exon1:c.237_246del:p.N79fs,
ARF-/-,TCF3::ZNF384 +e8, NRAS G12D	182_BM_KD023	0.5167	NA	exonic	missense	Tns4:NM_172564:exon11:c.G1912A:p.E638K,
ARF-/-,TCF3::ZNF384 +e8, NRAS G12D	182_BM_KD023	1	rs244287559:0	exonic	missense	Vmn2r80:NM_001103368:exon3:c.A947G:p.N316S,
ARF-/-,TCF3::ZNF384 +e8, NRAS G12D	182_BM_KD023	1	NA	exonic	missense	Xirp1:NM_011724:exon2:c.A2909C:p.Q970P,
ARF-/-,TCF3::ZNF384 +e8, NRAS G12D	182_BM_KD023	0.8	NA	exonic	missense	Zan:NM_011741:exon24:c.C4990G:p.L1664V,
ARF-/-,TCF3::ZNF384 +e8, NRAS G12D	182_BM_KD023	0.4696	NA	exonic	missense	Zfp169:NM_026450:exon5:c.G1469T:p.G490V,
ARF-/-,TCF3::ZNF384 +e8, NRAS G12D	182_BM_KD023	0.8333	NA	exonic	missense	Zic5:NM_022987:exon1:c.C275T:p.S92F,
ARF-/-,TCF3::ZNF384 +e8, NRAS G12D	179_SPL_KD023	1	NA	exonic	missense	4833420G17Rik:NM_001113550:exon9:c.C1451A:p.T484K
ARF-/-,TCF3::ZNF384 +e8, NRAS G12D	179_SPL_KD023	1	rs262569844:0	exonic	missense	Adamts3:NM_001081401:exon4:c.G595A:p.V199I
ARF-/-,TCF3::ZNF384 +e8, NRAS G12D	179_SPL_KD023	1	NA	exonic	missense	Adcy5:NM_001012765:exon15:c.G2770A:p.V924M,
ARF-/-,TCF3::ZNF384 +e8, NRAS G12D	179_SPL_KD023	1	NA	exonic	missense	Amotl2:NM_019764:exon2:c.C297G:p.S99R,
ARF-/-,TCF3::ZNF384 +e8, NRAS G12D	179_SPL_KD023	0.1059	NA	exonic	missense	BC061237:NM_198677:exon3:c.G186C:p.E62D,
ARF-/-,TCF3::ZNF384 +e8, NRAS G12D	179_SPL_KD023	0.557	NA	exonic	missense	Bmpr2:NM_007561:exon7:c.G962A:p.R321Q,
ARF-/-,TCF3::ZNF384 +e8, NRAS G12D	179_SPL_KD023	1	NA	exonic	missense	Casz1:NM_027195:exon16:c.T3260C:p.L1087P,
ARF-/-,TCF3::ZNF384 +e8, NRAS G12D	179_SPL_KD023	0.9959	NA	exonic	missense	Ccnl1:NM_001355432:exon11:c.G739T:p.D247Y,
ARF-/-,TCF3::ZNF384 +e8, NRAS G12D	179_SPL_KD023	0.9484	NA	exonic	fs_del	Cilp:NM_001364527:exon11:c.3210delG:p.M1070fs,
ARF-/-,TCF3::ZNF384 +e8, NRAS G12D	179_SPL_KD023	0.1023	NA	exonic	missense	Cited2:NM_010828:exon2:c.C407A:p.P136Q,
ARF-/-,TCF3::ZNF384 +e8, NRAS G12D	179_SPL_KD023	0.114	NA	exonic	nonsense	Cmah:NM_001284519:exon8:c.C505T:p.R169X
ARF-/-,TCF3::ZNF384 +e8, NRAS G12D	179_SPL_KD023	0.9915	rs46190260:0	exonic	missense	Cmya5:NM_023821:exon9:c.G10240C:p.A3414P,
ARF-/-,TCF3::ZNF384 +e8, NRAS G12D	179_SPL_KD023	0.9735	NA	exonic	fs_del	Crb1:NM_133239:exon9:c.3481delC:p.R1161fs,
ARF-/-,TCF3::ZNF384 +e8, NRAS G12D	179_SPL_KD023	0.9834	NA	exonic	missense	Cyfip2:NM_133769:exon25:c.C2903T:p.S968F,
ARF-/-,TCF3::ZNF384 +e8, NRAS G12D	179_SPL_KD023	0.439	rs248157600:0	exonic	missense	Fam160b2:NM_194345:exon14:c.C1725A:p.S575R,
ARF-/-,TCF3::ZNF384 +e8, NRAS G12D	179_SPL_KD023	0.452	NA	exonic	missense	Fat1:NM_001081286:exon9:c.G7076T:p.R2359M,
ARF-/-,TCF3::ZNF384 +e8, NRAS G12D	179_SPL_KD023	0.2246	NA	exonic	missense	Fbxw21:NM_177069:exon7:c.A914G:p.H305R,
ARF-/-,TCF3::ZNF384 +e8, NRAS G12D	179_SPL_KD023	0.9919	NA	exonic	missense	Fras1:NM_175473:exon62:c.T9404C:p.L3135P,
ARF-/-,TCF3::ZNF384 +e8, NRAS G12D	179_SPL_KD023	0.2727	rs585222029:0	exonic	missense	Gm10324:NM_001177832:exon4:c.A1373G:p.K458R,
ARF-/-,TCF3::ZNF384 +e8, NRAS G12D	179_SPL_KD023	0.9873	rs50213431:0	exonic	missense	Gm9805:NM_001362121:exon5:c.?:p.Y376C
ARF-/-,TCF3::ZNF384 +e8, NRAS G12D	179_SPL_KD023	0.9858	NA	exonic	missense	Herc2:NM_001360080:exon24:c.G3704A:p.G1235D,
ARF-/-,TCF3::ZNF384 +e8, NRAS G12D	179_SPL_KD023	0.2886	NA	exonic	missense	Hmgxb4:NM_178017:exon3:c.C146T:p.A49V,
ARF-/-,TCF3::ZNF384 +e8, NRAS G12D	179_SPL_KD023	0.2328	NA	exonic	fs_del	Hmgxb4:NM_178017:exon5:c.630delT:p.A210fs,
ARF-/-,TCF3::ZNF384 +e8, NRAS G12D	179_SPL_KD023	0.1767	NA	exonic	missense	Hmgxb4:NM_001316753:exon10:c.G1135A:p.V379I
ARF-/-,TCF3::ZNF384 +e8, NRAS G12D	179_SPL_KD023	0.125	NA	exonic	missense	Hnrnpul2:NM_001081196:exon4:c.A867C:p.K289N,
ARF-/-,TCF3::ZNF384 +e8, NRAS G12D	179_SPL_KD023	0.9949	NA	exonic	missense	Irx2:NM_010574:exon2:c.?:p.I153T
ARF-/-,TCF3::ZNF384 +e8, NRAS G12D	179_SPL_KD023	1	NA	exonic	missense	Lama1:NM_008480:exon14:c.G1966A:p.D656N,
ARF-/-,TCF3::ZNF384 +e8, NRAS G12D	179_SPL_KD023	0.1714	NA	exonic	missense	Lmo7:NM_201529:exon28:c.C4621T:p.R1541W,
ARF-/-,TCF3::ZNF384 +e8, NRAS G12D	179_SPL_KD023	0.4634	NA	splicing	splicing	Mettl3(NM_019721:exon8:c.1344-1->CA)
ARF-/-,TCF3::ZNF384 +e8, NRAS G12D	179_SPL_KD023	0.2833	NA	exonic	missense	Mkrn1:NM_018810:exon6:c.A1036T:p.N346Y,
ARF-/-,TCF3::ZNF384 +e8, NRAS G12D	179_SPL_KD023	0.405	NA	splicing	splicing	Myh6(NM_001164171:exon30:c.4176-2->TGC,
ARF-/-,TCF3::ZNF384 +e8, NRAS G12D	179_SPL_KD023	1	rs229712565:0	exonic	missense	Myo18b:NM_028901:exon36:c.G5804A:p.R1935H,
ARF-/-,TCF3::ZNF384 +e8, NRAS G12D	179_SPL_KD023	1	NA	exonic	missense	Myo5a:NM_010864:exon38:c.C5113T:p.R1705C,
ARF-/-,TCF3::ZNF384 +e8, NRAS G12D	179_SPL_KD023	0.1959	NA	exonic	missense	Nckap1l:NM_153505:exon18:c.A1823C:p.Q608P,
ARF-/-,TCF3::ZNF384 +e8, NRAS G12D	179_SPL_KD023	1	rs50934341:0	exonic	missense	Ndufs6:NM_010888:exon1:c.T11C:p.V4A,
ARF-/-,TCF3::ZNF384 +e8, NRAS G12D	179_SPL_KD023	0.9899	NA	exonic	missense	Nlrp12:NM_001033431:exon10:c.A3101G:p.K1034R,
ARF-/-,TCF3::ZNF384 +e8, NRAS G12D	179_SPL_KD023	1	NA	exonic	missense	Obsl1:NM_178884:exon19:c.C5291T:p.T1764M,
ARF-/-,TCF3::ZNF384 +e8, NRAS G12D	179_SPL_KD023	0.5223	NA	exonic	missense	Ostf1:NM_017375:exon9:c.G490A:p.A164T,
ARF-/-,TCF3::ZNF384 +e8, NRAS G12D	179_SPL_KD023	0.9823	rs225419060:0	exonic	missense	Padi3:NM_011060:exon6:c.T578C:p.L193P,
ARF-/-,TCF3::ZNF384 +e8, NRAS G12D	179_SPL_KD023	0.6358	NA	exonic	missense	Pkd2l1:NM_181422:exon3:c.C453G:p.I151M,
ARF-/-,TCF3::ZNF384 +e8, NRAS G12D	179_SPL_KD023	1	NA	exonic	missense	Pmch:NM_029971:exon2:c.T395C:p.I132T,
ARF-/-,TCF3::ZNF384 +e8, NRAS G12D	179_SPL_KD023	0.993	rs13460207:0	exonic	missense	Pinsr:NM_025669:exon11:c.?:p.R476G
ARF-/-,TCF3::ZNF384 +e8, NRAS G12D	179_SPL_KD023	0.7	NA	exonic	missense	Rgsl1:NM_001243223:exon20:c.G3193A:p.D1065N,
ARF-/-,TCF3::ZNF384 +e8, NRAS G12D	179_SPL_KD023	0.9937	rs50751634:0	exonic	missense	Slc15a2:NM_001145899:exon6:c.T629C:p.M210T
ARF-/-,TCF3::ZNF384 +e8, NRAS G12D	179_SPL_KD023	0.1174	NA	splicing	splicing	Slf1(NM_134071:exon17:c.2276+1->T)
ARF-/-,TCF3::ZNF384 +e8, NRAS G12D	179_SPL_KD023	0.5277	rs230596409:0	exonic	nonsense	Spata31:NM_030047:exon3:c.C1933T:p.R645X,
ARF-/-,TCF3::ZNF384 +e8, NRAS G12D	179_SPL_KD023	0.4847	NA	exonic	missense	Src:NM_001025395:exon5:c.G326T:p.R109L,
ARF-/-,TCF3::ZNF384 +e8, NRAS G12D	179_SPL_KD023	0.9831	NA	exonic	missense	Sspn:NM_010656:exon3:c.C367T:p.L123F,
ARF-/-,TCF3::ZNF384 +e8, NRAS G12D	179_SPL_KD023	0.9883	rs238893157:0	exonic	missense	Stxbp4:NM_011505:exon18:c.G1603A:p.A535T,
ARF-/-,TCF3::ZNF384 +e8, NRAS G12D	179_SPL_KD023	0.5101	NA	exonic	missense	Sulf1:NM_001198566:exon14:c.G1918A:p.D640N
ARF-/-,TCF3::ZNF384 +e8, NRAS G12D	179_SPL_KD023	0.4682	NA	exonic	fs_del	Timm8a2:NM_001037744:exon1:c.237_246del:p.N79fs,
ARF-/-,TCF3::ZNF384 +e8, NRAS G12D	179_SPL_KD023	0.7385	NA	exonic	missense	Tns4:NM_172564:exon11:c.G1912A:p.E638K,
ARF-/-,TCF3::ZNF384 +e8, NRAS G12D	179_SPL_KD023	1	rs244287559:0	exonic	missense	Vmn2r80:NM_001103368:exon3:c.A947G:p.N316S,
ARF-/-,TCF3::ZNF384 +e8, NRAS G12D	179_SPL_KD023	0.9826	NA	exonic	missense	Xirp1:NM_011724:exon2:c.A2909C:p.Q970P,
ARF-/-,TCF3::ZNF384 +e8, NRAS G12D	179_SPL_KD023	0.597	NA	exonic	missense	Zan:NM_011741:exon24:c.C4990G:p.L1664V,
ARF-/-,TCF3::ZNF384 +e8, NRAS G12D	179_SPL_KD023	0.4305	NA	exonic	missense	Zfp169:NM_026450:exon5:c.G1469T:p.G490V,
ARF-/-,TCF3::ZNF384 +e8, NRAS G12D	179_SPL_KD023	0.7083	NA	exonic	missense	Zic5:NM_022987:exon1:c.C275T:p.S92F,
ARF-/-,TCF3::ZNF384 +e8, NRAS G12D	181_SPL_KD023	1	NA	exonic	missense	4833420G17Rik:NM_001113550:exon9:c.C1451A:p.T484K
ARF-/-,TCF3::ZNF384 +e8, NRAS G12D	181_SPL_KD023	0.9877	rs262569844:0	exonic	missense	Adamts3:NM_001081401:exon4:c.G595A:p.V199I
ARF-/-,TCF3::ZNF384 +e8, NRAS G12D	181_SPL_KD023	0.9909	NA	exonic	missense	Adcy5:NM_001012765:exon15:c.G2770A:p.V924M,
ARF-/-,TCF3::ZNF384 +e8, NRAS G12D	181_SPL_KD023	0.9848	NA	exonic	missense	Amotl2:NM_019764:exon2:c.C297G:p.S99R,
ARF-/-,TCF3::ZNF384 +e8, NRAS G12D	181_SPL_KD023	0.1217	NA	exonic	missense	BC061237:NM_198677:exon3:c.G186C:p.E62D,
ARF-/-,TCF3::ZNF384 +e8, NRAS G12D	181_SPL_KD023	0.4569	NA	exonic	missense	Bmpr2:NM_007561:exon7:c.G962A:p.R321Q,
ARF-/-,TCF3::ZNF384 +e8, NRAS G12D	181_SPL_KD023	1	NA	exonic	missense	Casz1:NM_027195:exon16:c.T3260C:p.L1087P
ARF-/-,TCF3::ZNF384 +e8, NRAS G12D	181_SPL_KD023	0.9884	NA	exonic	missense	Ccnl1:NM_001355432:exon11:c.G739T:p.D247Y
ARF-/-,TCF3::ZNF384 +e8, NRAS G12D	181_SPL_KD023	0.9091	NA	exonic	fs_del	Cilp:NM_001364527:exon11:c.3210delG:p.M1070fs
ARF-/-,TCF3::ZNF384 +e8, NRAS G12D	181_SPL_KD023	0.1921	NA	exonic	missense	Cited2:NM_010828:exon2:c.C407A:p.P136Q,
ARF-/-,TCF3::ZNF384 +e8, NRAS G12D	181_SPL_KD023	0.9804	rs46190260:0	exonic	missense	Cmya5:NM_023821:exon9:c.G10240C:p.A3414P,
ARF-/-,TCF3::ZNF384 +e8, NRAS G12D	181_SPL_KD023	0.9766	NA	exonic	fs_del	Crb1:NM_133239:exon9:c.3481delC:p.R1161fs,
ARF-/-,TCF3::ZNF384 +e8, NRAS G12D	181_SPL_KD023	0.9759	NA	exonic	missense	Cyfip2:NM_133769:exon25:c.C2903T:p.S968F
ARF-/-,TCF3::ZNF384 +e8, NRAS G12D	181_SPL_KD023	0.437	rs248157600:0	exonic	missense	Fam160b2:NM_194345:exon14:c.C1725A:p.S575R,
ARF-/-,TCF3::ZNF384 +e8, NRAS G12D	181_SPL_KD023	0.4471	NA	exonic	missense	Fat1:NM_001081286:exon9:c.G7076T:p.R2359M,
ARF-/-,TCF3::ZNF384 +e8, NRAS G12D	181_SPL_KD023	0.2663	NA	exonic	missense	Fbxw21:NM_177069:exon7:c.A914G:p.H305R,
ARF-/-,TCF3::ZNF384 +e8, NRAS G12D	181_SPL_KD023	0.995	NA	exonic	missense	Fras1:NM_175473:exon62:c.T9404C:p.L3135P,
ARF-/-,TCF3::ZNF384 +e8, NRAS G12D	181_SPL_KD023	0.4118	rs585222029:0	exonic	missense	Gm10324:NM_001177832:exon4:c.A1373G:p.K458R,
ARF-/-,TCF3::ZNF384 +e8, NRAS G12D	181_SPL_KD023	1	rs50213431:0	exonic	missense	Gm9805:NM_001362121:exon5:c.?:p.Y376C
ARF-/-,TCF3::ZNF384 +e8, NRAS G12D	181_SPL_KD023	0.9885	NA	exonic	missense	Herc2:NM_001360080:exon24:c.G3704A:p.G1235D
ARF-/-,TCF3::ZNF384 +e8, NRAS G12D	181_SPL_KD023	0.278	NA	exonic	missense	Hmgxb4:NM_178017:exon3:c.C146T:p.A49V,
ARF-/-,TCF3::ZNF384 +e8, NRAS G12D	181_SPL_KD023	0.2925	NA	exonic	fs_del	Hmgxb4:NM_178017:exon5:c.630delT:p.A210fs
ARF-/-,TCF3::ZNF384 +e8, NRAS G12D	181_SPL_KD023	0.1673	NA	exonic	missense	Hmgxb4:NM_001316753:exon10:c.G1135A:p.V379I
ARF-/-,TCF3::ZNF384 +e8, NRAS G12D	181_SPL_KD023	0.1235	NA	exonic	missense	Hnrnpul2:NM_001081196:exon4:c.A867C:p.K289N,
ARF-/-,TCF3::ZNF384 +e8, NRAS G12D	181_SPL_KD023	0.9962	NA	exonic	missense	Irx2:NM_010574:exon2:c.?:p.I153T
ARF-/-,TCF3::ZNF384 +e8, NRAS G12D	181_SPL_KD023	0.9966	NA	exonic	missense	Lama1:NM_008480:exon14:c.G1966A:p.D656N,
ARF-/-,TCF3::ZNF384 +e8, NRAS G12D	181_SPL_KD023	0.2254	NA	exonic	missense	Lmo7:NM_201529:exon28:c.C4621T:p.R1541W
ARF-/-,TCF3::ZNF384 +e8, NRAS G12D	181_SPL_KD023	0.4664	NA	splicing	splicing	Mettl3(NM_019721:exon8:c.1344-1->CA)
ARF-/-,TCF3::ZNF384 +e8, NRAS G12D	181_SPL_KD023	0.1283	NA	exonic	missense	Mkrn1:NM_018810:exon6:c.A1036T:p.N346Y
ARF-/-,TCF3::ZNF384 +e8, NRAS G12D	181_SPL_KD023	0.4615	NA	splicing	splicing	Myh6(NM_001164171:exon30:c.4176-2->TGC,
ARF-/-,TCF3::ZNF384 +e8, NRAS G12D	181_SPL_KD023	1	rs229712565:0	exonic	missense	Myo18b:NM_028901:exon36:c.G5804A:p.R1935H,
ARF-/-,TCF3::ZNF384 +e8, NRAS G12D	181_SPL_KD023	0.9837	NA	exonic	missense	Myo5a:NM_010864:exon38:c.C5113T:p.R1705C,
ARF-/-,TCF3::ZNF384 +e8, NRAS G12D	181_SPL_KD023	0.9928	rs50934341:0	exonic	missense	Ndufs6:NM_010888:exon1:c.T11C:p.V4A,
ARF-/-,TCF3::ZNF384 +e8, NRAS G12D	181_SPL_KD023	0.9917	NA	exonic	missense	Nlrp12:NM_001033431:exon10:c.A3101G:p.K1034R,
ARF-/-,TCF3::ZNF384 +e8, NRAS G12D	181_SPL_KD023	0.9883	NA	exonic	missense	Obsl1:NM_178884:exon19:c.C5291T:p.T1764M,
ARF-/-,TCF3::ZNF384 +e8, NRAS G12D	181_SPL_KD023	0.4221	NA	exonic	missense	Ostf1:NM_017375:exon9:c.G490A:p.A164T,
ARF-/-,TCF3::ZNF384 +e8, NRAS G12D	181_SPL_KD023	1	rs225419060:0	exonic	missense	Padi3:NM_011060:exon6:c.T578C:p.L193P,
ARF-/-,TCF3::ZNF384 +e8, NRAS G12D	181_SPL_KD023	0.4069	NA	exonic	missense	Pkd2l1:NM_181422:exon3:c.C453G:p.I151M,
ARF-/-,TCF3::ZNF384 +e8, NRAS G12D	181_SPL_KD023	0.9806	NA	exonic	missense	Pmch:NM_029971:exon2:c.T395C:p.I132T,
ARF-/-,TCF3::ZNF384 +e8, NRAS G12D	181_SPL_KD023	0.9927	rs13460207:0	exonic	missense	Pinsr:NM_025669:exon11:c.?:p.R476G
ARF-/-,TCF3::ZNF384 +e8, NRAS G12D	181_SPL_KD023	0.6685	NA	exonic	missense	Rgsl1:NM_001243223:exon20:c.G3193A:p.D1065N,
ARF-/-,TCF3::ZNF384 +e8, NRAS G12D	181_SPL_KD023	0.9901	rs50751634:0	exonic	missense	Slc15a2:NM_001145899:exon6:c.T629C:p.M210T
ARF-/-,TCF3::ZNF384 +e8, NRAS G12D	181_SPL_KD023	0.1545	NA	splicing	splicing	Slf1(NM_134071:exon17:c.2276+1->T)
ARF-/-,TCF3::ZNF384 +e8, NRAS G12D	181_SPL_KD023	0.5077	rs230596409:0	exonic	nonsense	Spata31:NM_030047:exon3:c.C1933T:p.R645X,
ARF-/-,TCF3::ZNF384 +e8, NRAS G12D	181_SPL_KD023	0.6983	NA	exonic	missense	Src:NM_001025395:exon5:c.G326T:p.R109L
ARF-/-,TCF3::ZNF384 +e8, NRAS G12D	181_SPL_KD023	1	NA	exonic	missense	Sspn:NM_010656:exon3:c.C367T:p.L123F
ARF-/-,TCF3::ZNF384 +e8, NRAS G12D	181_SPL_KD023	0.9802	rs238893157:0	exonic	missense	Stxbp4:NM_011505:exon18:c.G1603A:p.A535T,
ARF-/-,TCF3::ZNF384 +e8, NRAS G12D	181_SPL_KD023	0.5122	NA	exonic	missense	Sulf1:NM_001198566:exon14:c.G1918A:p.D640N
ARF-/-,TCF3::ZNF384 +e8, NRAS G12D	181_SPL_KD023	0.3286	NA	exonic	fs_del	Timm8a2:NM_001037744:exon1:c.237_246del:p.N79fs,
ARF-/-,TCF3::ZNF384 +e8, NRAS G12D	181_SPL_KD023	0.9483	NA	exonic	missense	Tns4:NM_172564:exon11:c.G1912A:p.E638K,
ARF-/-,TCF3::ZNF384 +e8, NRAS G12D	181_SPL_KD023	0.977	rs244287559:0	exonic	missense	Vmn2r80:NM_001103368:exon3:c.A947G:p.N316S,
ARF-/-,TCF3::ZNF384 +e8, NRAS G12D	181_SPL_KD023	0.9926	NA	exonic	missense	Xirp1:NM_011724:exon2:c.A2909C:p.Q970P,
ARF-/-,TCF3::ZNF384 +e8, NRAS G12D	181_SPL_KD023	0.6019	NA	exonic	missense	Zan:NM_011741:exon24:c.C4990G:p.L1664V,
ARF-/-,TCF3::ZNF384 +e8, NRAS G12D	181_SPL_KD023	0.57	NA	exonic	missense	Zfp169:NM_026450:exon5:c.G1469T:p.G490V
ARF-/-,TCF3::ZNF384 +e8, NRAS G12D	181_SPL_KD023	0.6316	NA	exonic	missense	Zic5:NM_022987:exon1:c.C275T:p.S92F,
ARF-/-,TCF3::ZNF384 -e8, NRAS G12D	173_BM_KD023	1	NA	exonic	missense	4833420G17Rik:NM_001113550:exon9:c.C1451A:p.T484K
ARF-/-,TCF3::ZNF384 -e8, NRAS G12D	173_BM_KD023	1	rs262569844:0	exonic	missense	Adamts3:NM_001081401:exon4:c.G595A:p.V199I
ARF-/-,TCF3::ZNF384 -e8, NRAS G12D	173_BM_KD023	1	NA	exonic	missense	Adcy5:NM_001012765:exon15:c.G2770A:p.V924M,
ARF-/-,TCF3::ZNF384 -e8, NRAS G12D	173_BM_KD023	0.9643	NA	exonic	missense	Amotl2:NM_019764:exon2:c.C297G:p.S99R,
ARF-/-,TCF3::ZNF384 -e8, NRAS G12D	173_BM_KD023	0.1231	NA	exonic	missense	BC061237:NM_198677:exon3:c.G186C:p.E62D,
ARF-/-,TCF3::ZNF384 -e8, NRAS G12D	173_BM_KD023	0.5561	NA	exonic	missense	Bmpr2:NM_007561:exon7:c.G962A:p.R321Q,
ARF-/-,TCF3::ZNF384 -e8, NRAS G12D	173_BM_KD023	0.9848	NA	exonic	missense	Casz1:NM_027195:exon16:c.T3260C:p.L1087P
ARF-/-,TCF3::ZNF384 -e8, NRAS G12D	173_BM_KD023	1	NA	exonic	missense	Ccnl1:NM_001355432:exon11:c.G739T:p.D247Y
ARF-/-,TCF3::ZNF384 -e8, NRAS G12D	173_BM_KD023	0.9672	NA	exonic	fs_del	Cilp:NM_001364527:exon11:c.3210delG:p.M1070fs
ARF-/-,TCF3::ZNF384 -e8, NRAS G12D	173_BM_KD023	1	rs46190260:0	exonic	missense	Cmya5:NM_023821:exon9:c.G10240C:p.A3414P,
ARF-/-,TCF3::ZNF384 -e8, NRAS G12D	173_BM_KD023	0.9884	NA	exonic	fs_del	Crb1:NM_133239:exon9:c.3481delC:p.R1161fs,
ARF-/-,TCF3::ZNF384 -e8, NRAS G12D	173_BM_KD023	0.9942	NA	exonic	missense	Cyfip2:NM_133769:exon25:c.C2903T:p.S968F
ARF-/-,TCF3::ZNF384 -e8, NRAS G12D	173_BM_KD023	0.4578	rs248157600:0	exonic	missense	Fam160b2:NM_194345:exon14:c.C1725A:p.S575R,
ARF-/-,TCF3::ZNF384 -e8, NRAS G12D	173_BM_KD023	0.5363	NA	exonic	missense	Fat1:NM_001081286:exon9:c.G7076T:p.R2359M,
ARF-/-,TCF3::ZNF384 -e8, NRAS G12D	173_BM_KD023	0.4411	NA	exonic	missense	Fbxw21:NM_177069:exon7:c.A914G:p.H305R,
ARF-/-,TCF3::ZNF384 -e8, NRAS G12D	173_BM_KD023	1	NA	exonic	missense	Fras1:NM_175473:exon62:c.T9404C:p.L3135P,
ARF-/-,TCF3::ZNF384 -e8, NRAS G12D	173_BM_KD023	0.2381	NA	exonic	missense	Galnt11:NM_001359890:exon6:c.TT880_881GG:p.F294G
ARF-/-,TCF3::ZNF384 -e8, NRAS G12D	173_BM_KD023	0.4118	rs585222029:0	exonic	missense	Gm10324:NM_001177832:exon4:c.A1373G:p.K458R,
ARF-/-,TCF3::ZNF384 -e8, NRAS G12D	173_BM_KD023	1	rs50213431:0	exonic	missense	Gm9805:NM_001362121:exon5:c.?:p.Y376C
ARF-/-,TCF3::ZNF384 -e8, NRAS G12D	173_BM_KD023	0.1774	NA	exonic	missense	Guca1a:NM_008189:exon1:c.A10G:p.I4V,
ARF-/-,TCF3::ZNF384 -e8, NRAS G12D	173_BM_KD023	1	NA	exonic	missense	Herc2:NM_001360080:exon24:c.G3704A:p.G1235D
ARF-/-,TCF3::ZNF384 -e8, NRAS G12D	173_BM_KD023	0.3333	NA	exonic	missense	Hmgxb4:NM_178017:exon3:c.C146T:p.A49V,
ARF-/-,TCF3::ZNF384 -e8, NRAS G12D	173_BM_KD023	0.2915	NA	exonic	fs_del	Hmgxb4:NM_001316753:exon6:c.303delT:p.A101fs
ARF-/-,TCF3::ZNF384 -e8, NRAS G12D	173_BM_KD023	0.199	NA	exonic	missense	Hmgxb4:NM_001316753:exon10:c.G1135A:p.V379I
ARF-/-,TCF3::ZNF384 -e8, NRAS G12D	173_BM_KD023	1	NA	exonic	missense	Irx2:NM_010574:exon2:c.?:p.I153T
ARF-/-,TCF3::ZNF384 -e8, NRAS G12D	173_BM_KD023	0.9966	NA	exonic	missense	Lama1:NM_008480:exon14:c.G1966A:p.D656N,
ARF-/-,TCF3::ZNF384 -e8, NRAS G12D	173_BM_KD023	0.4235	NA	exonic	missense	Lmo7:NM_201529:exon28:c.C4621T:p.R1541W
ARF-/-,TCF3::ZNF384 -e8, NRAS G12D	173_BM_KD023	0.9891	NA	exonic	missense	Lrrc19:NM_175305:exon4:c.A715G:p.T239A
ARF-/-,TCF3::ZNF384 -e8, NRAS G12D	173_BM_KD023	0.4203	NA	splicing	splicing	Mettl3(NM_019721:exon8:c.1344-1->CA)
ARF-/-,TCF3::ZNF384 -e8, NRAS G12D	173_BM_KD023	0.4464	NA	splicing	splicing	Myh6(NM_001164171:exon30:c.4176-2->TGC
ARF-/-,TCF3::ZNF384 -e8, NRAS G12D	173_BM_KD023	1	rs229712565:0	exonic	missense	Myo18b:NM_028901:exon36:c.G5804A:p.R1935H,
ARF-/-,TCF3::ZNF384 -e8, NRAS G12D	173_BM_KD023	1	NA	exonic	missense	Myo5a:NM_010864:exon38:c.C5113T:p.R1705C,
ARF-/-,TCF3::ZNF384 -e8, NRAS G12D	173_BM_KD023	1	rs50934341:0	exonic	missense	Ndufs6:NM_010888:exon1:c.T11C:p.V4A,
ARF-/-,TCF3::ZNF384 -e8, NRAS G12D	173_BM_KD023	0.9959	NA	exonic	missense	Nlrp12:NM_001033431:exon10:c.A3101G:p.K1034R,
ARF-/-,TCF3::ZNF384 -e8, NRAS G12D	173_BM_KD023	1	NA	exonic	missense	Obsl1:NM_178884:exon19:c.C5291T:p.T1764M,
ARF-/-,TCF3::ZNF384 -e8, NRAS G12D	173_BM_KD023	0.4839	NA	exonic	missense	Ostf1:NM_017375:exon9:c.G490A:p.A164T,
ARF-/-,TCF3::ZNF384 -e8, NRAS G12D	173_BM_KD023	0.9785	rs225419060:0	exonic	missense	Padi3:NM_011060:exon6:c.T578C:p.L193P,
ARF-/-,TCF3::ZNF384 -e8, NRAS G12D	173_BM_KD023	0.4954	NA	exonic	missense	Pkd2l1:NM_181422:exon3:c.C453G:p.I151M,
ARF-/-,TCF3::ZNF384 -e8, NRAS G12D	173_BM_KD023	1	NA	exonic	missense	Pmch:NM_029971:exon2:c.T395C:p.I132T,
ARF-/-,TCF3::ZNF384 -e8, NRAS G12D	173_BM_KD023	0.977	rs13460207:0	exonic	missense	Pinsr:NM_025669:exon11:c.?:p.R476G
ARF-/-,TCF3::ZNF384 -e8, NRAS G12D	173_BM_KD023	0.4395	NA	exonic	missense	Rgsl1:NM_001243223:exon20:c.G3193A:p.D1065N,
ARF-/-,TCF3::ZNF384 -e8, NRAS G12D	173_BM_KD023	1	rs50751634:0	exonic	missense	Slc15a2:NM_001145899:exon6:c.T629C:p.M210T
ARF-/-,TCF3::ZNF384 -e8, NRAS G12D	173_BM_KD023	0.5576	rs230596409:0	exonic	nonsense	Spata31:NM_030047:exon3:c.C1933T:p.R645X,
ARF-/-,TCF3::ZNF384 -e8, NRAS G12D	173_BM_KD023	0.881	NA	exonic	missense	Src:NM_001025395:exon5:c.G326T:p.R109L
ARF-/-,TCF3::ZNF384 -e8, NRAS G12D	173_BM_KD023	1	NA	exonic	missense	Sspn:NM_010656:exon3:c.C367T:p.L123F
ARF-/-,TCF3::ZNF384 -e8, NRAS G12D	173_BM_KD023	1	rs238893157:0	exonic	missense	Stxbp4:NM_011505:exon18:c.G1603A:p.A535T,
ARF-/-,TCF3::ZNF384 -e8, NRAS G12D	173_BM_KD023	0.5062	NA	exonic	missense	Sulf1:NM_001198566:exon14:c.G1918A:p.D640N
ARF-/-,TCF3::ZNF384 -e8, NRAS G12D	173_BM_KD023	0.4286	NA	exonic	fs_del	Timm8a2:NM_001037744:exon1:c.237_246del:p.N79fs,
ARF-/-,TCF3::ZNF384 -e8, NRAS G12D	173_BM_KD023	0.922	NA	exonic	missense	Tns4:NM_172564:exon11:c.G1912A:p.E638K,
ARF-/-,TCF3::ZNF384 -e8, NRAS G12D	173_BM_KD023	0.9966	rs244287559:0	exonic	missense	Vmn2r80:NM_001103368:exon3:c.A947G:p.N316S,
ARF-/-,TCF3::ZNF384 -e8, NRAS G12D	173_BM_KD023	1	NA	exonic	missense	Xirp1:NM_011724:exon2:c.A2909C:p.Q970P,
ARF-/-,TCF3::ZNF384 -e8, NRAS G12D	173_BM_KD023	0.5103	NA	exonic	missense	Zan:NM_011741:exon24:c.C4990G:p.L1664V,
ARF-/-,TCF3::ZNF384 -e8, NRAS G12D	173_BM_KD023	0.1379	NA	exonic	inframe_del	Zcchc10:NM_026479:exon4:c.462_464del:p.154_155del,
ARF-/-,TCF3::ZNF384 -e8, NRAS G12D	173_BM_KD023	0.4854	NA	exonic	missense	Zfp169:NM_026450:exon5:c.G1469T:p.G490V
ARF-/-,TCF3::ZNF384 -e8, NRAS G12D	173_BM_KD023	0.4211	NA	exonic	missense	Zic5:NM_022987:exon1:c.C275T:p.S92F,
ARF-/-,TCF3::ZNF384 -e8, NRAS G12D	171_SPL_KD023	0.9508	NA	exonic	missense	4833420G17Rik:NM_001113550:exon9:c.C1451A:p.T484K
ARF-/-,TCF3::ZNF384 -e8, NRAS G12D	171_SPL_KD023	0.9693	rs262569844:0	exonic	missense	Adamts3:NM_001081401:exon4:c.G595A:p.V199I
ARF-/-,TCF3::ZNF384 -e8, NRAS G12D	171_SPL_KD023	0.9899	NA	exonic	missense	Adcy5:NM_001012765:exon15:c.G2770A:p.V924M,
ARF-/-,TCF3::ZNF384 -e8, NRAS G12D	171_SPL_KD023	0.9677	NA	exonic	missense	Amotl2:NM_019764:exon2:c.C297G:p.S99R,
ARF-/-,TCF3::ZNF384 -e8, NRAS G12D	171_SPL_KD023	0.4941	NA	exonic	missense	Bmpr2:NM_007561:exon7:c.G962A:p.R321Q,
ARF-/-,TCF3::ZNF384 -e8, NRAS G12D	171_SPL_KD023	0.989	NA	exonic	missense	Casz1:NM_027195:exon16:c.T3260C:p.L1087P
ARF-/-,TCF3::ZNF384 -e8, NRAS G12D	171_SPL_KD023	0.9831	NA	exonic	missense	Ccnl1:NM_001355432:exon11:c.G739T:p.D247Y
ARF-/-,TCF3::ZNF384 -e8, NRAS G12D	171_SPL_KD023	0.2464	NA	exonic	missense	Cep290:NM_146009:exon36:c.A4814C:p.Q1605P,
ARF-/-,TCF3::ZNF384 -e8, NRAS G12D	171_SPL_KD023	0.9308	NA	exonic	fs_del	Cilp:NM_001364527:exon11:c.3210delG:p.M1070fs
ARF-/-,TCF3::ZNF384 -e8, NRAS G12D	171_SPL_KD023	0.1719	NA	exonic	missense	Cited2:NM_010828:exon2:c.C407A:p.P136Q,
ARF-/-,TCF3::ZNF384 -e8, NRAS G12D	171_SPL_KD023	0.9811	rs46190260:0	exonic	missense	Cmya5:NM_023821:exon9:c.G10240C:p.A3414P,
ARF-/-,TCF3::ZNF384 -e8, NRAS G12D	171_SPL_KD023	0.9497	NA	exonic	fs_del	Crb1:NM_133239:exon9:c.3481delC:p.R1161fs,
ARF-/-,TCF3::ZNF384 -e8, NRAS G12D	171_SPL_KD023	0.9816	NA	exonic	missense	Cyfip2:NM_133769:exon25:c.C2903T:p.S968F
ARF-/-,TCF3::ZNF384 -e8, NRAS G12D	171_SPL_KD023	0.2059	rs248157600:0	exonic	missense	Fam160b2:NM_194345:exon14:c.C1725A:p.S575R,
ARF-/-,TCF3::ZNF384 -e8, NRAS G12D	171_SPL_KD023	0.7727	NA	exonic	missense	Fat1:NM_001081286:exon9:c.G7076T:p.R2359M,
ARF-/-,TCF3::ZNF384 -e8, NRAS G12D	171_SPL_KD023	0.2838	NA	exonic	missense	Fbxw21:NM_177069:exon7:c.A914G:p.H305R,
ARF-/-,TCF3::ZNF384 -e8, NRAS G12D	171_SPL_KD023	0.9953	NA	exonic	missense	Fras1:NM_175473:exon62:c.T9404C:p.L3135P,
ARF-/-,TCF3::ZNF384 -e8, NRAS G12D	171_SPL_KD023	0.5217	rs585222029:0	exonic	missense	Gm10324:NM_001177832:exon4:c.A1373G:p.K458R,
ARF-/-,TCF3::ZNF384 -e8, NRAS G12D	171_SPL_KD023	0.973	rs50213431:0	exonic	missense	Gm9805:NM_001362121:exon5:c.?:p.Y376C
ARF-/-,TCF3::ZNF384 -e8, NRAS G12D	171_SPL_KD023	0.3611	NA	exonic	missense	Guca1a:NM_008189:exon1:c.A10G:p.I4V,
ARF-/-,TCF3::ZNF384 -e8, NRAS G12D	171_SPL_KD023	0.9863	NA	exonic	missense	Herc2:NM_001360080:exon24:c.G3704A:p.G1235D
ARF-/-,TCF3::ZNF384 -e8, NRAS G12D	171_SPL_KD023	0.1367	NA	exonic	missense	Hmgxb4:NM_178017:exon3:c.C146T:p.A49V,
ARF-/-,TCF3::ZNF384 -e8, NRAS G12D	171_SPL_KD023	0.1179	NA	exonic	fs_del	Hmgxb4:NM_178017:exon5:c.630delT:p.A210fs
ARF-/-,TCF3::ZNF384 -e8, NRAS G12D	171_SPL_KD023	0.0927	NA	exonic	missense	Hmgxb4:NM_001316753:exon10:c.G1135A:p.V379I
ARF-/-,TCF3::ZNF384 -e8, NRAS G12D	171_SPL_KD023	0.0915	NA	exonic	missense	Hnrnpul2:NM_001081196:exon4:c.A867C:p.K289N,
ARF-/-,TCF3::ZNF384 -e8, NRAS G12D	171_SPL_KD023	0.2421	NA	exonic	missense	Inpp5d:NM_010566:exon25:c.A2944C:p.N982H
ARF-/-,TCF3::ZNF384 -e8, NRAS G12D	171_SPL_KD023	0.9969	NA	exonic	missense	Irx2:NM_010574:exon2:c.?:p.I153T
ARF-/-,TCF3::ZNF384 -e8, NRAS G12D	171_SPL_KD023	0.9904	NA	exonic	missense	Lama1:NM_008480:exon14:c.G1966A:p.D656N,
ARF-/-,TCF3::ZNF384 -e8, NRAS G12D	171_SPL_KD023	0.1649	NA	splicing	splicing	Mettl3(NM_019721:exon8:c.1344-1->CA)
ARF-/-,TCF3::ZNF384 -e8, NRAS G12D	171_SPL_KD023	0.1162	NA	exonic	missense	Mkrn1:NM_018810:exon6:c.A1036T:p.N346Y
ARF-/-,TCF3::ZNF384 -e8, NRAS G12D	171_SPL_KD023	0.2011	NA	splicing	splicing	Myh6(NM_001164171:exon30:c.4176-2->TGC,
ARF-/-,TCF3::ZNF384 -e8, NRAS G12D	171_SPL_KD023	0.9661	rs229712565:0	exonic	missense	Myo18b:NM_028901:exon36:c.G5804A:p.R1935H,
ARF-/-,TCF3::ZNF384 -e8, NRAS G12D	171_SPL_KD023	0.9794	NA	exonic	missense	Myo5a:NM_010864:exon38:c.C5113T:p.R1705C,
ARF-/-,TCF3::ZNF384 -e8, NRAS G12D	171_SPL_KD023	0.2427	NA	exonic	missense	Nckap1l:NM_153505:exon18:c.A1823C:p.Q608P,
ARF-/-,TCF3::ZNF384 -e8, NRAS G12D	171_SPL_KD023	0.9786	rs50934341:0	exonic	missense	Ndufs6:NM_010888:exon1:c.T11C:p.V4A,
ARF-/-,TCF3::ZNF384 -e8, NRAS G12D	171_SPL_KD023	0.9936	NA	exonic	missense	Nlrp12:NM_001033431:exon10:c.A3101G:p.K1034R,
ARF-/-,TCF3::ZNF384 -e8, NRAS G12D	171_SPL_KD023	0.9899	NA	exonic	missense	Obsl1:NM_178884:exon19:c.C5291T:p.T1764M,
ARF-/-,TCF3::ZNF384 -e8, NRAS G12D	171_SPL_KD023	0.4716	NA	exonic	missense	Ostf1:NM_017375:exon9:c.G490A:p.A164T,
ARF-/-,TCF3::ZNF384 -e8, NRAS G12D	171_SPL_KD023	0.9913	rs225419060:0	exonic	missense	Padi3:NM_011060:exon6:c.T578C:p.L193P,
ARF-/-,TCF3::ZNF384 -e8, NRAS G12D	171_SPL_KD023	0.1374	NA	exonic	missense	Pkd2l1:NM_181422:exon3:c.C453G:p.I151M,
ARF-/-,TCF3::ZNF384 -e8, NRAS G12D	171_SPL_KD023	0.9869	NA	exonic	missense	Pmch:NM_029971:exon2:c.T395C:p.I132T,
ARF-/-,TCF3::ZNF384 -e8, NRAS G12D	171_SPL_KD023	0.9714	rs13460207:0	exonic	missense	Pinsr:NM_025669:exon11:c.?:p.R476G
ARF-/-,TCF3::ZNF384 -e8, NRAS G12D	171_SPL_KD023	0.6114	NA	exonic	missense	Rgsl1:NM_001243223:exon20:c.G3193A:p.D1065N,
ARF-/-,TCF3::ZNF384 -e8, NRAS G12D	171_SPL_KD023	0.9807	rs50751634:0	exonic	missense	Slc15a2:NM_001145899:exon6:c.T629C:p.M210T
ARF-/-,TCF3::ZNF384 -e8, NRAS G12D	171_SPL_KD023	0.1229	NA	splicing	splicing	Slf1(NM_134071:exon17:c.2276+1->T)
ARF-/-,TCF3::ZNF384 -e8, NRAS G12D	171_SPL_KD023	0.4578	rs230596409:0	exonic	nonsense	Spata31:NM_030047:exon3:c.C1933T:p.R645X,
ARF-/-,TCF3::ZNF384 -e8, NRAS G12D	171_SPL_KD023	0.1048	NA	exonic	missense	Src:NM_001025395:exon5:c.G326T:p.R109L
ARF-/-,TCF3::ZNF384 -e8, NRAS G12D	171_SPL_KD023	0.9902	NA	exonic	missense	Sspn:NM_010656:exon3:c.C367T:p.L123F
ARF-/-,TCF3::ZNF384 -e8, NRAS G12D	171_SPL_KD023	0.9935	rs238893157:0	exonic	missense	Stxbp4:NM_011505:exon18:c.G1603A:p.A535T,
ARF-/-,TCF3::ZNF384 -e8, NRAS G12D	171_SPL_KD023	0.4808	NA	exonic	missense	Sulf1:NM_001198566:exon14:c.G1918A:p.D640N
ARF-/-,TCF3::ZNF384 -e8, NRAS G12D	171_SPL_KD023	0.7077	NA	exonic	fs_del	Timm8a2:NM_001037744:exon1:c.237_246del:p.N79fs,
ARF-/-,TCF3::ZNF384 -e8, NRAS G12D	171_SPL_KD023	0.5655	NA	exonic	missense	Tns4:NM_172564:exon11:c.G1912A:p.E638K,
ARF-/-,TCF3::ZNF384 -e8, NRAS G12D	171_SPL_KD023	0.9847	rs244287559:0	exonic	missense	Vmn2r80:NM_001103368:exon3:c.A947G:p.N316S,
ARF-/-,TCF3::ZNF384 -e8, NRAS G12D	171_SPL_KD023	1	NA	exonic	missense	Xirp1:NM_011724:exon2:c.A2909C:p.Q970P,
ARF-/-,TCF3::ZNF384 -e8, NRAS G12D	171_SPL_KD023	0.5605	NA	exonic	missense	Zan:NM_011741:exon24:c.C4990G:p.L1664V,
ARF-/-,TCF3::ZNF384 -e8, NRAS G12D	171_SPL_KD023	0.4416	NA	exonic	missense	Zfp169:NM_026450:exon5:c.G1469T:p.G490V
ARF-/-,TCF3::ZNF384 -e8, NRAS G12D	171_SPL_KD023	0.8929	NA	exonic	missense	Zic5:NM_022987:exon1:c.C275T:p.S92F,
ARF-/-,TCF3::ZNF384 -e8, NRAS G12D	172_SPL_KD023	0.3009	NA	exonic	missense	2700049A03Rik:NM_001163378:exon27:c.T4132C:p.S1378P
ARF-/-,TCF3::ZNF384 -e8, NRAS G12D	172_SPL_KD023	0.9873	NA	exonic	missense	4833420G17Rik:NM_001113550:exon9:c.C1451A:p.T484K
ARF-/-,TCF3::ZNF384 -e8, NRAS G12D	172_SPL_KD023	0.9937	rs262569844:0	exonic	missense	Adamts3:NM_001081401:exon4:c.G595A:p.V199I
ARF-/-,TCF3::ZNF384 -e8, NRAS G12D	172_SPL_KD023	1	NA	exonic	missense	Adcy5:NM_001012765:exon15:c.G2770A:p.V924M,
ARF-/-,TCF3::ZNF384 -e8, NRAS G12D	172_SPL_KD023	0.6667	rs49016930:0	exonic	missense	Agps:NM_172666:exon1:c.A1T:p.M1L,
ARF-/-,TCF3::ZNF384 -e8, NRAS G12D	172_SPL_KD023	0.9848	NA	exonic	missense	Amotl2:NM_019764:exon2:c.C297G:p.S99R,
ARF-/-,TCF3::ZNF384 -e8, NRAS G12D	172_SPL_KD023	0.1772	NA	exonic	missense	Bmpr2:NM_007561:exon7:c.G962A:p.R321Q,
ARF-/-,TCF3::ZNF384 -e8, NRAS G12D	172_SPL_KD023	0.9867	NA	exonic	missense	Casz1:NM_027195:exon16:c.T3260C:p.L1087P
ARF-/-,TCF3::ZNF384 -e8, NRAS G12D	172_SPL_KD023	0.9922	NA	exonic	missense	Ccnl1:NM_001355432:exon11:c.G739T:p.D247Y
ARF-/-,TCF3::ZNF384 -e8, NRAS G12D	172_SPL_KD023	0.9462	NA	exonic	fs_del	Cilp:NM_001364527:exon11:c.3210delG:p.M1070fs
ARF-/-,TCF3::ZNF384 -e8, NRAS G12D	172_SPL_KD023	0.3854	NA	exonic	missense	Cited2:NM_010828:exon2:c.C407A:p.P136Q,
ARF-/-,TCF3::ZNF384 -e8, NRAS G12D	172_SPL_KD023	1	rs46190260:0	exonic	missense	Cmya5:NM_023821:exon9:c.G10240C:p.A3414P,
ARF-/-,TCF3::ZNF384 -e8, NRAS G12D	172_SPL_KD023	0.9628	NA	exonic	fs_del	Crb1:NM_133239:exon9:c.3481delC:p.R1161fs,
ARF-/-,TCF3::ZNF384 -e8, NRAS G12D	172_SPL_KD023	0.9753	NA	exonic	missense	Cyfip2:NM_133769:exon25:c.C2903T:p.S968F
ARF-/-,TCF3::ZNF384 -e8, NRAS G12D	172_SPL_KD023	0.2477	NA	exonic	missense	Dgkz:NM_138306:exon30:c.A2627T:p.H876L
ARF-/-,TCF3::ZNF384 -e8, NRAS G12D	172_SPL_KD023	0.732	rs248157600:0	exonic	missense	Fam160b2:NM_194345:exon14:c.C1725A:p.S575R,
ARF-/-,TCF3::ZNF384 -e8, NRAS G12D	172_SPL_KD023	0.7781	NA	exonic	missense	Fat1:NM_001081286:exon9:c.G7076T:p.R2359M,
ARF-/-,TCF3::ZNF384 -e8, NRAS G12D	172_SPL_KD023	0.4021	NA	exonic	missense	Fbxw21:NM_177069:exon7:c.A914G:p.H305R,
ARF-/-,TCF3::ZNF384 -e8, NRAS G12D	172_SPL_KD023	1	NA	exonic	missense	Fras1:NM_175473:exon62:c.T9404C:p.L3135P,
ARF-/-,TCF3::ZNF384 -e8, NRAS G12D	172_SPL_KD023	0.5625	rs585222029:0	exonic	missense	Gm10324:NM_001177832:exon4:c.A1373G:p.K458R,
ARF-/-,TCF3::ZNF384 -e8, NRAS G12D	172_SPL_KD023	0.972	rs50213431:0	exonic	missense	Gm9805:NM_001362121:exon5:c.?:p.Y376C
ARF-/-,TCF3::ZNF384 -e8, NRAS G12D	172_SPL_KD023	0.283	NA	exonic	missense	Guca1a:NM_008189:exon1:c.A10G:p.I4V,
ARF-/-,TCF3::ZNF384 -e8, NRAS G12D	172_SPL_KD023	0.9776	NA	exonic	missense	Herc2:NM_001360080:exon24:c.G3704A:p.G1235D
ARF-/-,TCF3::ZNF384 -e8, NRAS G12D	172_SPL_KD023	0.9823	NA	exonic	missense	Irx2:NM_010574:exon2:c.?:p.I153T
ARF-/-,TCF3::ZNF384 -e8, NRAS G12D	172_SPL_KD023	0.2267	rs51622160:0	exonic	missense	Itga6:NM_001277970:exon25:c.A3151G:p.I1051V,
ARF-/-,TCF3::ZNF384 -e8, NRAS G12D	172_SPL_KD023	0.1812	NA	exonic	missense	Itprid2:NM_080558:exon16:c.T3213G:p.I1071M,
ARF-/-,TCF3::ZNF384 -e8, NRAS G12D	172_SPL_KD023	0.5192	NA	exonic	nonsense	Kdm6a:NM_009483:exon25:c.T3557A:p.L1186X
ARF-/-,TCF3::ZNF384 -e8, NRAS G12D	172_SPL_KD023	0.9946	NA	exonic	missense	Lama1:NM_008480:exon14:c.G1966A:p.D656N,
ARF-/-,TCF3::ZNF384 -e8, NRAS G12D	172_SPL_KD023	0.1106	NA	exonic	missense	Mkrn1:NM_018810:exon6:c.A1036T:p.N346Y
ARF-/-,TCF3::ZNF384 -e8, NRAS G12D	172_SPL_KD023	0.9825	rs229712565:0	exonic	missense	Myo18b:NM_028901:exon36:c.G5804A:p.R1935H,
ARF-/-,TCF3::ZNF384 -e8, NRAS G12D	172_SPL_KD023	0.9779	NA	exonic	missense	Myo5a:NM_010864:exon38:c.C5113T:p.R1705C,
ARF-/-,TCF3::ZNF384 -e8, NRAS G12D	172_SPL_KD023	0.9851	rs50934341:0	exonic	missense	Ndufs6:NM_010888:exon1:c.T11C:p.V4A,
ARF-/-,TCF3::ZNF384 -e8, NRAS G12D	172_SPL_KD023	0.9935	NA	exonic	missense	Nlrp12:NM_001033431:exon10:c.A3101G:p.K1034R,
ARF-/-,TCF3::ZNF384 -e8, NRAS G12D	172_SPL_KD023	0.9885	NA	exonic	missense	Obsl1:NM_178884:exon19:c.C5291T:p.T1764M,
ARF-/-,TCF3::ZNF384 -e8, NRAS G12D	172_SPL_KD023	0.3027	NA	exonic	missense	Olfr1131:NM_146658:exon1:c.G66C:p.M22I,
ARF-/-,TCF3::ZNF384 -e8, NRAS G12D	172_SPL_KD023	0.267	NA	exonic	missense	Olfr1450:NM_146371:exon1:c.C796A:p.H266N,
ARF-/-,TCF3::ZNF384 -e8, NRAS G12D	172_SPL_KD023	0.8556	NA	exonic	missense	Ostf1:NM_017375:exon9:c.G490A:p.A164T,
ARF-/-,TCF3::ZNF384 -e8, NRAS G12D	172_SPL_KD023	0.9918	rs225419060:0	exonic	missense	Padi3:NM_011060:exon6:c.T578C:p.L193P,
ARF-/-,TCF3::ZNF384 -e8, NRAS G12D	172_SPL_KD023	0.1646	NA	exonic	missense	Pkd2l1:NM_181422:exon3:c.C453G:p.I151M,
ARF-/-,TCF3::ZNF384 -e8, NRAS G12D	172_SPL_KD023	0.9917	NA	exonic	missense	Pmch:NM_029971:exon2:c.T395C:p.I132T,
ARF-/-,TCF3::ZNF384 -e8, NRAS G12D	172_SPL_KD023	0.9864	rs13460207:0	exonic	missense	Pinsr:NM_025669:exon11:c.?:p.R476G
ARF-/-,TCF3::ZNF384 -e8, NRAS G12D	172_SPL_KD023	0.292	NA	exonic	missense	Rgsl1:NM_001243223:exon20:c.G3193A:p.D1065N,
ARF-/-,TCF3::ZNF384 -e8, NRAS G12D	172_SPL_KD023	0.0594	NA	exonic	fs_del	Rps4x:NM_009094:exon7:c.758_764del:p.D253fs,
ARF-/-,TCF3::ZNF384 -e8, NRAS G12D	172_SPL_KD023	0.9893	rs50751634:0	exonic	missense	Slc15a2:NM_001145899:exon6:c.T629C:p.M210T
ARF-/-,TCF3::ZNF384 -e8, NRAS G12D	172_SPL_KD023	0.3808	NA	splicing	splicing	Slf1(NM_134071:exon17:c.2276+1->T)
ARF-/-,TCF3::ZNF384 -e8, NRAS G12D	172_SPL_KD023	0.9073	rs230596409:0	exonic	nonsense	Spata31:NM_030047:exon3:c.C1933T:p.R645X,
ARF-/-,TCF3::ZNF384 -e8, NRAS G12D	172_SPL_KD023	0.3636	NA	exonic	missense	Src:NM_001025395:exon5:c.G326T:p.R109L
ARF-/-,TCF3::ZNF384 -e8, NRAS G12D	172_SPL_KD023	1	NA	exonic	missense	Sspn:NM_010656:exon3:c.C367T:p.L123F
ARF-/-,TCF3::ZNF384 -e8, NRAS G12D	172_SPL_KD023	0.9907	rs238893157:0	exonic	missense	Stxbp4:NM_011505:exon18:c.G1603A:p.A535T,
ARF-/-,TCF3::ZNF384 -e8, NRAS G12D	172_SPL_KD023	0.4731	NA	exonic	missense	Sulf1:NM_001198566:exon14:c.G1918A:p.D640N
ARF-/-,TCF3::ZNF384 -e8, NRAS G12D	172_SPL_KD023	0.8424	NA	exonic	fs_del	Timm8a2:NM_001037744:exon1:c.237_246del:p.N79fs,
ARF-/-,TCF3::ZNF384 -e8, NRAS G12D	172_SPL_KD023	0.8056	NA	exonic	missense	Tns4:NM_172564:exon11:c.G1912A:p.E638K,
ARF-/-,TCF3::ZNF384 -e8, NRAS G12D	172_SPL_KD023	0.1855	NA	exonic	missense	Ttn:NM_028004:exon24:c.C4184T:p.A1395V
ARF-/-,TCF3::ZNF384 -e8, NRAS G12D	172_SPL_KD023	0.1497	NA	exonic	missense	Ttn:NM_028004:exon7:c.C1181T:p.A394V,
ARF-/-,TCF3::ZNF384 -e8, NRAS G12D	172_SPL_KD023	0.131	NA	exonic	nonsense	Vmn1r20:NM_001101533:exon1:c.T771G:p.Y257X,
ARF-/-,TCF3::ZNF384 -e8, NRAS G12D	172_SPL_KD023	0.9852	rs244287559:0	exonic	missense	Vmn2r80:NM_001103368:exon3:c.A947G:p.N316S,
ARF-/-,TCF3::ZNF384 -e8, NRAS G12D	172_SPL_KD023	1	NA	exonic	missense	Xirp1:NM_011724:exon2:c.A2909C:p.Q970P,
ARF-/-,TCF3::ZNF384 -e8, NRAS G12D	172_SPL_KD023	0.4937	NA	exonic	missense	Zan:NM_011741:exon24:c.C4990G:p.L1664V,
ARF-/-,TCF3::ZNF384 -e8, NRAS G12D	172_SPL_KD023	1	NA	exonic	missense	Zic5:NM_022987:exon1:c.C275T:p.S92F,
ARF-/-,TCF3::ZNF384 -e8, NRAS G12D	1751_SPL_KD023	0.4694	NA	exonic	missense	2700049A03Rik:NM_001163378:exon27:c.T4132C:p.S1378P
ARF-/-,TCF3::ZNF384 -e8, NRAS G12D	1751_SPL_KD023	0.9643	NA	exonic	missense	4833420G17Rik:NM_001113550:exon9:c.C1451A:p.T484K
ARF-/-,TCF3::ZNF384 -e8, NRAS G12D	1751_SPL_KD023	0.4405	NA	exonic	missense	Adam34:NM_145745:exon2:c.G869A:p.R290H,
ARF-/-,TCF3::ZNF384 -e8, NRAS G12D	1751_SPL_KD023	0.993	rs262569844:0	exonic	missense	Adamts3:NM_001081401:exon4:c.G595A:p.V199I
ARF-/-,TCF3::ZNF384 -e8, NRAS G12D	1751_SPL_KD023	1	NA	exonic	missense	Adcy5:NM_001012765:exon15:c.G2770A:p.V924M,
ARF-/-,TCF3::ZNF384 -e8, NRAS G12D	1751_SPL_KD023	1	NA	exonic	missense	Amotl2:NM_019764:exon2:c.C297G:p.S99R,
ARF-/-,TCF3::ZNF384 -e8, NRAS G12D	1751_SPL_KD023	1	NA	exonic	missense	Casz1:NM_027195:exon16:c.T3260C:p.L1087P
ARF-/-,TCF3::ZNF384 -e8, NRAS G12D	1751_SPL_KD023	0.9812	NA	exonic	missense	Ccnl1:NM_001355432:exon11:c.G739T:p.D247Y
ARF-/-,TCF3::ZNF384 -e8, NRAS G12D	1751_SPL_KD023	0.9569	NA	exonic	fs_del	Cilp:NM_001364527:exon11:c.3210delG:p.M1070fs
ARF-/-,TCF3::ZNF384 -e8, NRAS G12D	1751_SPL_KD023	0.4238	NA	exonic	missense	Cited2:NM_010828:exon2:c.C407A:p.P136Q,
ARF-/-,TCF3::ZNF384 -e8, NRAS G12D	1751_SPL_KD023	1	rs46190260:0	exonic	missense	Cmya5:NM_023821:exon9:c.G10240C:p.A3414P,
ARF-/-,TCF3::ZNF384 -e8, NRAS G12D	1751_SPL_KD023	0.9822	NA	exonic	fs_del	Crb1:NM_133239:exon9:c.3481delC:p.R1161fs,
ARF-/-,TCF3::ZNF384 -e8, NRAS G12D	1751_SPL_KD023	1	NA	exonic	missense	Cyfip2:NM_133769:exon25:c.C2903T:p.S968F
ARF-/-,TCF3::ZNF384 -e8, NRAS G12D	1751_SPL_KD023	1	rs248157600:0	exonic	missense	Fam160b2:NM_194345:exon14:c.C1725A:p.S575R,
ARF-/-,TCF3::ZNF384 -e8, NRAS G12D	1751_SPL_KD023	0.9913	NA	exonic	missense	Fat1:NM_001081286:exon9:c.G7076T:p.R2359M,
ARF-/-,TCF3::ZNF384 -e8, NRAS G12D	1751_SPL_KD023	0.5657	NA	exonic	missense	Fbxw21:NM_177069:exon7:c.A914G:p.H305R,
ARF-/-,TCF3::ZNF384 -e8, NRAS G12D	1751_SPL_KD023	0.9947	NA	exonic	missense	Fras1:NM_175473:exon62:c.T9404C:p.L3135P,
ARF-/-,TCF3::ZNF384 -e8, NRAS G12D	1751_SPL_KD023	0.7714	rs585222029:0	exonic	missense	Gm10324:NM_001177832:exon4:c.A1373G:p.K458R,
ARF-/-,TCF3::ZNF384 -e8, NRAS G12D	1751_SPL_KD023	0.9854	rs50213431:0	exonic	missense	Gm9805:NM_001362121:exon5:c.?:p.Y376C
ARF-/-,TCF3::ZNF384 -e8, NRAS G12D	1751_SPL_KD023	0.6269	NA	exonic	missense	Guca1a:NM_008189:exon1:c.A10G:p.I4V,
ARF-/-,TCF3::ZNF384 -e8, NRAS G12D	1751_SPL_KD023	1	NA	exonic	missense	Herc2:NM_001360080:exon24:c.G3704A:p.G1235D
ARF-/-,TCF3::ZNF384 -e8, NRAS G12D	1751_SPL_KD023	0.9962	NA	exonic	missense	Irx2:NM_010574:exon2:c.?:p.I153T
ARF-/-,TCF3::ZNF384 -e8, NRAS G12D	1751_SPL_KD023	1	NA	exonic	nonsense	Kdm6a:NM_009483:exon25:c.T3557A:p.L1186X
ARF-/-,TCF3::ZNF384 -e8, NRAS G12D	1751_SPL_KD023	0.9886	NA	exonic	missense	Lama1:NM_008480:exon14:c.G1966A:p.D656N,
ARF-/-,TCF3::ZNF384 -e8, NRAS G12D	1751_SPL_KD023	0.462	NA	exonic	missense	Mtmr14:NM_001362183:exon5:c.C203T:p.T68M
ARF-/-,TCF3::ZNF384 -e8, NRAS G12D	1751_SPL_KD023	1	rs229712565:0	exonic	missense	Myo18b:NM_028901:exon36:c.G5804A:p.R1935H,
ARF-/-,TCF3::ZNF384 -e8, NRAS G12D	1751_SPL_KD023	0.9882	NA	exonic	missense	Myo5a:NM_010864:exon38:c.C5113T:p.R1705C,
ARF-/-,TCF3::ZNF384 -e8, NRAS G12D	1751_SPL_KD023	1	rs50934341:0	exonic	missense	Ndufs6:NM_010888:exon1:c.T11C:p.V4A,
ARF-/-,TCF3::ZNF384 -e8, NRAS G12D	1751_SPL_KD023	0.9771	NA	exonic	missense	Nlrp12:NM_001033431:exon10:c.A3101G:p.K1034R,
ARF-/-,TCF3::ZNF384 -e8, NRAS G12D	1751_SPL_KD023	0.9942	NA	exonic	missense	Obsl1:NM_178884:exon19:c.C5291T:p.T1764M,
ARF-/-,TCF3::ZNF384 -e8, NRAS G12D	1751_SPL_KD023	0.5271	NA	exonic	missense	Olfr1131:NM_146658:exon1:c.G66C:p.M22I,
ARF-/-,TCF3::ZNF384 -e8, NRAS G12D	1751_SPL_KD023	0.4887	NA	exonic	missense	Olfr1450:NM_146371:exon1:c.C796A:p.H266N,
ARF-/-,TCF3::ZNF384 -e8, NRAS G12D	1751_SPL_KD023	0.9871	NA	exonic	missense	Ostf1:NM_017375:exon9:c.G490A:p.A164T,
ARF-/-,TCF3::ZNF384 -e8, NRAS G12D	1751_SPL_KD023	1	rs225419060:0	exonic	missense	Padi3:NM_011060:exon6:c.T578C:p.L193P,
ARF-/-,TCF3::ZNF384 -e8, NRAS G12D	1751_SPL_KD023	1	NA	exonic	missense	Pmch:NM_029971:exon2:c.T395C:p.I132T,
ARF-/-,TCF3::ZNF384 -e8, NRAS G12D	1751_SPL_KD023	0.9917	rs13460207:0	exonic	missense	Pinsr:NM_025669:exon11:c.?:p.R476G
ARF-/-,TCF3::ZNF384 -e8, NRAS G12D	1751_SPL_KD023	0.0719	NA	exonic	fs_del	Rps4x:NM_009094:exon7:c.758_764del:p.D253fs,
ARF-/-,TCF3::ZNF384 -e8, NRAS G12D	1751_SPL_KD023	0.996	rs50751634:0	exonic	missense	Slc15a2:NM_001145899:exon6:c.T629C:p.M210T
ARF-/-,TCF3::ZNF384 -e8, NRAS G12D	1751_SPL_KD023	0.4132	NA	splicing	splicing	Slf1(NM_134071:exon17:c.2276+1->T)
ARF-/-,TCF3::ZNF384 -e8, NRAS G12D	1751_SPL_KD023	0.469	NA	exonic	missense	Slitrk1:NM_199065:exon1:c.T2000G:p.V667G,
ARF-/-,TCF3::ZNF384 -e8, NRAS G12D	1751_SPL_KD023	1	rs230596409:0	exonic	nonsense	Spata31:NM_030047:exon3:c.C1933T:p.R645X,
ARF-/-,TCF3::ZNF384 -e8, NRAS G12D	1751_SPL_KD023	0.5149	NA	exonic	missense	Src:NM_001025395:exon5:c.G326T:p.R109L
ARF-/-,TCF3::ZNF384 -e8, NRAS G12D	1751_SPL_KD023	0.9744	NA	exonic	missense	Sspn:NM_010656:exon3:c.C367T:p.L123F
ARF-/-,TCF3::ZNF384 -e8, NRAS G12D	1751_SPL_KD023	0.9819	rs238893157:0	exonic	missense	Stxbp4:NM_011505:exon18:c.G1603A:p.A535T
ARF-/-,TCF3::ZNF384 -e8, NRAS G12D	1751_SPL_KD023	0.4798	NA	exonic	missense	Sulf1:NM_001198566:exon14:c.G1918A:p.D640N
ARF-/-,TCF3::ZNF384 -e8, NRAS G12D	1751_SPL_KD023	0.8614	NA	exonic	fs_del	Timm8a2:NM_001037744:exon1:c.237_246del:p.N79fs
ARF-/-,TCF3::ZNF384 -e8, NRAS G12D	1751_SPL_KD023	0.9935	NA	exonic	missense	Tns4:NM_172564:exon11:c.G1912A:p.E638K
ARF-/-,TCF3::ZNF384 -e8, NRAS G12D	1751_SPL_KD023	1	rs244287559:0	exonic	missense	Vmn2r80:NM_001103368:exon3:c.A947G:p.N316S
ARF-/-,TCF3::ZNF384 -e8, NRAS G12D	1751_SPL_KD023	0.9839	NA	exonic	missense	Xirp1:NM_011724:exon2:c.A2909C:p.Q970P,
ARF-/-,TCF3::ZNF384 -e8, NRAS G12D	1751_SPL_KD023	0.4346	NA	exonic	missense	Zan:NM_011741:exon24:c.C4990G:p.L1664V,
ARF-/-,TCF3::ZNF384 -e8, NRAS G12D	1751_SPL_KD023	1	NA	exonic	missense	Zic5:NM_022987:exon1:c.C275T:p.S92F,

## Sheet: ST6
Supplemental Table 6. Sc-RNA-seq differentially expressed genes in each partition.
HSC/MPP/GMP/CLP							MPP/MEP							Neutrophil							Stem/neutrophil							Stem/proB
Gene	p_val	avg_logFC	pct.1	pct.2	p_val_adj		Gene	p_val	avg_logFC	pct.1	pct.2	p_val_adj		Gene	p_val	avg_logFC	pct.1	pct.2	p_val_adj		Gene	p_val	avg_logFC	pct.1	pct.2	p_val_adj		gene	p_val	avg_logFC	pct.1	pct.2	p_val_adj
Dntt	1.76224e-12	-0.569387	0.149	0.238	3.21537e-08		Hbb-bt	0.0878196	-0.581056	0.179	0.195	1		Wfdc17	1.70385e-174	-1.58455	0.021	0.214	3.10884e-170		Mmp8	3.61248e-33	1.81689	0.405	0.081	6.59133e-29		Mpo	2.51443e-33	-1.27412	0.275	0.576	4.58782e-29
Hist1h2ap	7.16519e-48	-0.566727	0.803	0.902	1.30736e-43		Hbb-bs	0.0941594	-0.571012	0.224	0.191	1		Ifi27l2a	2.283e-122	-1.06075	0.237	0.494	4.16556e-118		Spp1	1.21365e-65	0.711208	0.601	0.098	2.21443e-61		Ighm	8.18614e-19	-1.14666	0.069	0.244	1.49364e-14
Gm10076	0	-0.556274	0.989	0.998	0		Lgals1	4.06137e-47	-0.56864	0.548	0.736	7.41037e-43		Ccl6	2.43197e-127	-0.978881	0.278	0.532	4.43738e-123		Clec4a2	4.5973e-82	0.615474	0.995	0.944	8.38823e-78		Mcpt8	2.83726e-10	-1.10777	0.039	0.14	5.17687e-06
Ms4a3	3.63826e-26	-0.526605	0.276	0.428	6.63837e-22		Plac8	2.00631e-48	-0.56412	0.655	0.862	3.66072e-44		Marcks	3.01572e-156	-0.885314	0.152	0.438	5.50249e-152		Chil1	1.12684e-39	0.592843	0.874	0.704	2.05604e-35		Igkc	4.83943e-07	-1.01889	0.088	0.182	0.00883003
Fos	1.44282e-54	-0.502463	0.598	0.785	2.63257e-50		Gm10076	3.51683e-288	-0.562317	0.985	0.983	6.41681e-284		St8sia4	3.70517e-135	-0.806178	0.063	0.269	6.76046e-131		Ldhc	1.69617e-45	0.52718	0.514	0.108	3.09483e-41		Prtn3	1.5801e-27	-0.990917	0.232	0.514	2.88305e-23
Ndufb1-ps	8.44049e-205	-0.499377	0.946	0.991	1.54005e-200		Mt2	5.29354e-31	-0.525682	0.419	0.535	9.6586e-27		Il1rn	3.3387e-238	-0.729906	0.038	0.31	6.09179e-234		Gm34084	3.55012e-34	0.460714	0.637	0.33	6.47754e-30		Lgals1	2.89344e-18	-0.895548	0.146	0.35	5.27936e-14
Atp5k	1.92736e-174	-0.483921	0.911	0.984	3.51667e-170		Rpl38	1.70134e-264	-0.510072	0.998	0.998	3.10427e-260		Ccr1	5.31303e-195	-0.71327	0.34	0.717	9.69415e-191		Smim14	9.51667e-33	0.446375	0.867	0.724	1.73641e-28		Plac8	2.36872e-24	-0.85199	0.36	0.603	4.32197e-20
Hist1h2ae	1.60618e-19	-0.482536	0.767	0.851	2.93063e-15		Rps28	8.27094e-255	-0.499142	0.998	0.999	1.50912e-250		Mpeg1	1.12765e-95	-0.693658	0.135	0.34	2.0575e-91		Slc22a15	1.62852e-37	0.428159	0.831	0.599	2.9714e-33		Rps29	5.55503e-74	-0.789583	0.895	0.987	1.01357e-69
Lgals1	4.54117e-60	-0.4776	0.886	0.94	8.28582e-56		Ctla2a	9.08601e-06	-0.494471	0.396	0.444	0.165783		Clec4e	5.28243e-148	-0.673946	0.131	0.391	9.63831e-144		Ces1d	1.74853e-49	0.426951	0.437	0.024	3.19036e-45		Ifi27l2a	1.58731e-09	-0.741171	0.025	0.109	2.89621e-05
Rps29	4.24181e-249	-0.452393	0.999	1	7.7396e-245		Ndufb1-ps	1.88185e-204	-0.491171	0.964	0.978	3.43363e-200		Mpo	7.41556e-130	-0.659964	0.154	0.411	1.35304e-125		Mppe1	2.09975e-36	0.424113	0.815	0.528	3.8312e-32		Rps28	5.3763e-53	-0.731146	0.82	0.947	9.80961e-49
Hist1h3c	1.30408e-26	-0.448419	0.395	0.541	2.37943e-22		Rps27	6.02905e-236	-0.482303	0.996	0.994	1.10006e-231		Trps1	3.99387e-126	-0.626455	0.05	0.235	7.28721e-122		Kmt5a	4.5416e-39	0.423183	0.987	0.936	8.28661e-35		Cd52	7.06015e-11	-0.727759	0.163	0.315	1.2882e-06
Rpl38	8.03967e-219	-0.436826	0.999	1	1.46692e-214		Rps29	1.99808e-242	-0.48229	0.998	0.999	3.64569e-238		Slfn4	6.36008e-105	-0.614331	0.449	0.674	1.16046e-100		Gm21188	5.62781e-38	0.418882	0.725	0.44	1.02685e-33		Tmsb10	4.95645e-11	-0.716342	0.312	0.45	9.04353e-07
Rps28	6.49042e-225	-0.432257	0.999	1	1.18424e-220		Casp3	1.11607e-80	-0.480487	0.825	0.883	2.03639e-76		Rps28	3.81154e-151	-0.602372	0.628	0.858	6.95453e-147		Mgst2	2.30384e-30	0.37849	0.945	0.873	4.20358e-26		H2afy	2.87707e-12	-0.692375	0.367	0.521	5.2495e-08
Crip1	5.12015e-26	-0.428494	0.839	0.929	9.34223e-22		Rps21	2.53053e-256	-0.443463	0.998	0.997	4.61721e-252		Il1b	6.21653e-68	-0.599678	0.139	0.316	1.13427e-63		Hhex	3.38766e-29	0.373302	0.638	0.362	6.18113e-25		Vim	3.66905e-07	-0.671156	0.149	0.253	0.00669455
Ifi27l2a	4.259e-48	-0.427505	0.281	0.521	7.77098e-44		Ifitm1	1.6971e-06	-0.434122	0.299	0.364	0.0309654		Wfdc21	5.43562e-158	-0.584787	0.811	0.895	9.91784e-154		Napsa	1.12879e-19	0.354726	0.856	0.714	2.05958e-15		Rpl39	7.67959e-41	-0.660829	0.822	0.925	1.40122e-36
Hist1h4d	2.32875e-32	-0.408662	0.589	0.762	4.24904e-28		S100a8	3.84541e-43	-0.430339	0.946	0.973	7.01634e-39		Cd33	2.6902e-118	-0.574264	0.512	0.742	4.90854e-114		Dock8	2.54528e-28	0.352638	0.937	0.848	4.64412e-24		Fos	4.59792e-06	-0.659926	0.06	0.135	0.0838936
Rps27	2.26789e-216	-0.407908	0.999	1	4.13799e-212		Hist1h2ap	9.44039e-33	-0.426511	0.842	0.881	1.72249e-28		Tmsb10	3.76963e-92	-0.573555	0.233	0.449	6.87807e-88		Slc3a2	8.43764e-25	0.349961	0.714	0.501	1.53953e-20		Rpl38	2.61911e-51	-0.649117	0.802	0.945	4.77882e-47
Sec61g	7.24766e-112	-0.397766	0.954	0.984	1.32241e-107		mt-Nd4l	6.32746e-101	-0.425089	0.839	0.918	1.15451e-96		Rsad2	5.16847e-83	-0.563253	0.049	0.191	9.4304e-79		Slc2a3	4.83675e-23	0.34819	0.681	0.43	8.82514e-19		Hist1h3c	0.000442922	-0.64304	0.222	0.29	1
Gria3	1.98084e-94	-0.394065	0.39	0.716	3.61424e-90		Rpl37	4.001e-225	-0.421145	0.999	0.997	7.30022e-221		Bst1	7.78586e-104	-0.55881	0.14	0.36	1.42061e-99		Ppa1	6.80981e-31	0.343996	0.6	0.279	1.24252e-26		Rps27	1.94398e-28	-0.63723	0.708	0.823	3.54699e-24
Elane	3.01099e-11	-0.390002	0.536	0.643	5.49384e-07		Atp5k	3.24249e-111	-0.41833	0.929	0.955	5.91625e-107		Thbs1	3.90161e-78	-0.534253	0.046	0.179	7.11888e-74		9830166K06Rik	1.42306e-23	0.332698	0.455	0.181	2.59651e-19		Emb	2.06454e-10	-0.630636	0.056	0.171	3.76695e-06
Atp5md	1.25026e-131	-0.384091	0.919	0.984	2.28123e-127		Fos	1.84249e-32	-0.404949	0.385	0.561	3.36181e-28		Oasl2	6.43648e-71	-0.533776	0.11	0.276	1.1744e-66		Prdx6	2.34857e-33	0.329659	0.979	0.941	4.28521e-29		Ms4a3	2.63192e-05	-0.617727	0.045	0.106	0.48022
Ccr2	6.07932e-66	-0.379018	0.257	0.544	1.10923e-61		Rpl37a	3.15293e-214	-0.395901	0.997	0.999	5.75283e-210		Rpl38	3.31276e-133	-0.533205	0.678	0.869	6.04446e-129		Chil3	7.47349e-18	0.328779	0.957	0.892	1.36361e-13		Hist1h2ae	6.65855e-07	-0.6095	0.35	0.437	0.0121492
Rpl37	2.12651e-191	-0.375277	0.999	1	3.88004e-187		Rpl39	2.10638e-163	-0.389848	0.998	1	3.84329e-159		Rps29	1.20889e-215	-0.527177	0.885	0.972	2.20574e-211		Rilpl2	4.78865e-24	0.323283	0.618	0.384	8.73738e-20		Crip1	5.0647e-05	-0.574207	0.233	0.315	0.924105
Tmsb10	1.44227e-37	-0.373677	0.989	0.995	2.63156e-33		Hba-a1	0.858215	-0.385714	0.241	0.233	1		Prtn3	4.4943e-95	-0.524112	0.153	0.37	8.20031e-91		Aprt	1.91898e-27	0.308664	0.99	0.973	3.50137e-23		mt-Atp8	7.1603e-05	-0.570524	0.087	0.157	1
Rps21	1.11204e-192	-0.373578	1	1	2.02903e-188		Sec61g	4.68408e-121	-0.382189	0.944	0.958	8.54657e-117		Pla2g7	4.09536e-44	-0.519414	0.195	0.34	7.4724e-40		Ube2c	1.71669e-05	0.305159	0.821	0.787	0.313227		Tomm7	2.10669e-08	-0.569451	0.306	0.426	0.000384386
Tomm7	3.46469e-142	-0.367587	0.951	0.991	6.32168e-138		Tomm7	6.67764e-143	-0.378935	0.949	0.968	1.2184e-138		Cd84	1.50014e-81	-0.51553	0.389	0.607	2.73716e-77		Satb1	1.75151e-20	0.304839	0.571	0.342	3.19581e-16		Atp8b4	6.64688e-07	-0.563956	0.032	0.102	0.0121279
Ifi203	1.06114e-42	-0.366062	0.694	0.837	1.93616e-38		Cd24a	4.13791e-36	-0.349034	0.572	0.723	7.55002e-32		Slfn5	2.03362e-39	-0.510711	0.066	0.163	3.71054e-35		H2afx	3.72606e-09	0.304555	0.879	0.839	6.79856e-05		F13a1	3.84869e-09	-0.554644	0.022	0.102	7.02231e-05
Fn1	1.17784e-13	-0.362637	0.043	0.108	2.14909e-09		Atp5md	1.75248e-105	-0.348422	0.936	0.958	3.19757e-101		Cd300lf	7.9292e-75	-0.508063	0.378	0.58	1.44676e-70		mt-Co3	9.81597e-23	0.30427	1	1	1.79102e-18		Rpl37	5.85735e-32	-0.552642	0.843	0.92	1.06873e-27
Ndufa3	9.83521e-121	-0.360329	0.867	0.966	1.79453e-116		Tmsb4x	0.00175574	-0.340854	0.917	0.932	1		Ddx60	9.0037e-76	-0.507832	0.125	0.3	1.64282e-71		Marveld1	5.31557e-22	0.302392	0.549	0.301	9.69879e-18		Rps21	1.13132e-33	-0.550008	0.841	0.914	2.06421e-29
F13a1	1.28255e-21	-0.360174	0.4	0.547	2.34015e-17		Mpo	3.14643e-51	-0.338424	0.209	0.43	5.74098e-47		Rps21	3.05814e-140	-0.50301	0.727	0.902	5.57989e-136		Fcer1g	5.77031e-20	0.298613	0.985	0.949	1.05285e-15		Lcp1	5.34335e-08	-0.547924	0.114	0.231	0.000974948
Rpl39	7.68897e-178	-0.352785	0.999	1	1.40293e-173		Sox4	2.4039e-11	-0.336506	0.63	0.712	4.38615e-07		Gk	1.29546e-78	-0.496903	0.071	0.22	2.36369e-74		Lsp1	7.05339e-13	0.297855	0.801	0.675	1.28696e-08		Wfdc21	0.0042566	-0.547364	0.146	0.202	1
Mpeg1	1.45906e-62	-0.351989	0.264	0.542	2.6622e-58		Gm15915	1.30573e-28	-0.33065	0.73	0.783	2.38244e-24		Rps27	1.87803e-123	-0.496216	0.739	0.895	3.42665e-119		Samsn1	7.84048e-17	0.288332	0.832	0.699	1.43057e-12		Ctsg	1.09235e-06	-0.538941	0.177	0.29	0.019931
Ifitm1	5.32066e-25	-0.341681	0.542	0.688	9.70807e-21		Rpl36	9.85272e-160	-0.329961	0.997	0.998	1.79773e-155		Rpl37	6.91432e-132	-0.495879	0.834	0.94	1.26159e-127		Lims1	7.76443e-18	0.278892	0.914	0.866	1.4167e-13		Cst3	9.81211e-05	-0.534537	0.272	0.355	1
Cox7c	6.55641e-150	-0.341023	0.994	0.999	1.19628e-145		Hist1h3c	1.62252e-12	-0.328831	0.488	0.542	2.96046e-08		Serpinb1a	1.93154e-59	-0.495118	0.258	0.424	3.5243e-55		Camp	5.39757e-20	0.277093	0.973	0.949	9.8484e-16		Ndufb1-ps	9.33944e-08	-0.533441	0.423	0.501	0.00170407
mt-Nd4l	5.35318e-102	-0.338092	0.879	0.952	9.76741e-98		Hist1h4d	1.09413e-24	-0.328775	0.655	0.737	1.99635e-20		Rtp4	5.88998e-73	-0.482184	0.112	0.282	1.07469e-68		Arpc1b	2.20915e-40	0.270938	1	0.995	4.03081e-36		Hist1h4d	1.39781e-06	-0.526869	0.232	0.344	0.0255044
Cd24a	2.34406e-79	-0.337708	0.477	0.78	4.27698e-75		Mt1	2.76694e-14	-0.326895	0.754	0.776	5.04857e-10		Cmah	1.63521e-135	-0.478042	0.042	0.228	2.98361e-131		Dok2	1.43515e-18	0.267798	0.444	0.225	2.61857e-14		Atp5k	2.9395e-06	-0.512472	0.369	0.448	0.0536342
Bola2	1.20058e-84	-0.327564	0.865	0.943	2.19058e-80		Rpl35	9.52865e-211	-0.325317	0.996	0.99	1.7386e-206		Klra2	6.38368e-97	-0.475292	0.053	0.214	1.16477e-92		Lgals3	1.85987e-05	0.265676	0.688	0.619	0.339351		Selplg	0.00156405	-0.495887	0.062	0.111	1
Rpl37a	1.37357e-165	-0.325594	1	1	2.50621e-161		Cox17	6.58039e-59	-0.323882	0.887	0.907	1.20066e-54		Cstdc4	1.35702e-06	-0.474942	0.122	0.161	0.0247602		Cenpa	1.24377e-07	0.264464	0.817	0.79	0.00226939		Ndufa3	2.27164e-05	-0.49573	0.243	0.335	0.414484
Klf4	2.20965e-29	-0.323348	0.2	0.371	4.03173e-25		Eif3j1	2.09738e-77	-0.318354	0.873	0.911	3.82688e-73		Rpl37a	4.11732e-137	-0.469704	0.82	0.936	7.51247e-133		Hmgn2	1.50138e-23	0.264334	1	0.995	2.73942e-19		Ramp1	0.000351575	-0.492766	0.118	0.188	1
Atp5mpl	4.65368e-105	-0.321158	0.932	0.98	8.49111e-101		Rpl41	1.5497e-121	-0.317781	0.999	0.999	2.82758e-117		Il1r2	7.60401e-75	-0.468743	0.176	0.372	1.38743e-70		Ugdh	1.1992e-16	0.263929	0.606	0.401	2.18806e-12		Elane	2.31957e-07	-0.487794	0.23	0.37	0.00423229
Prtn3	4.89531e-10	-0.316696	0.957	0.955	8.93198e-06		mt-Nd3	2.05212e-84	-0.3151	0.956	0.976	3.74431e-80		Fabp5	2.35422e-98	-0.468277	0.033	0.175	4.29551e-94		mt-Cytb	1.47724e-11	0.261827	0.999	0.99	2.69538e-07		Irf8	0.0018686	-0.481846	0.087	0.142	1
Rpl41	2.23441e-135	-0.316343	1	1	4.0769e-131		Ndufa3	1.02486e-94	-0.313415	0.88	0.925	1.86996e-90		Ndufb1-ps	1.81408e-90	-0.468232	0.481	0.678	3.30996e-86		2021-09-01	7.97298e-15	0.260468	0.757	0.655	1.45475e-10		S100a8	1.39345e-06	-0.476321	0.921	0.965	0.0254248
Snrpf	6.40272e-114	-0.315338	0.974	0.995	1.16824e-109		Cox7c	9.79657e-108	-0.310198	0.986	0.99	1.78748e-103		Gcnt2	1.88244e-62	-0.467652	0.18	0.362	3.4347e-58		Cited2	5.61402e-14	0.260157	0.942	0.888	1.02433e-09		Pdcd4	0.000265736	-0.476138	0.26	0.339	1
Rpl35	1.82094e-185	-0.308	0.999	1	3.32249e-181		Tnfaip2	8.41868e-61	-0.306961	0.838	0.863	1.53607e-56		Rpl39	3.71224e-87	-0.464863	0.635	0.827	6.77336e-83		Nfam1	1.11742e-13	0.258329	0.893	0.792	2.03885e-09		Lmo4	0.000197845	-0.467018	0.072	0.135	1
Atp5e	1.51785e-122	-0.300791	0.99	0.999	2.76947e-118		Snrpg	1.16598e-106	-0.306797	0.988	0.989	2.12744e-102		Csf2rb	3.15879e-69	-0.452997	0.32	0.523	5.76352e-65		Mdh2	3.76933e-16	0.254089	0.924	0.868	6.87751e-12		Atp5md	0.000318289	-0.466436	0.348	0.401	1
Ccnd1	2.28914e-60	-0.293617	0.169	0.42	4.17677e-56		Vim	3.21368e-08	-0.300525	0.439	0.516	0.000586368		Csf3r	6.17361e-34	-0.452531	0.723	0.8	1.12644e-29		Slco4c1	9.37248e-15	0.25337	0.576	0.381	1.7101e-10		mt-Nd3	0.000120706	-0.464448	0.23	0.313	1
Snrpg	3.0285e-113	-0.292324	0.989	0.999	5.52581e-109		Tsc22d1	0.136579	-0.299153	0.702	0.705	1		Tacstd2	1.31175e-130	-0.451989	0.021	0.177	2.39342e-126		Ube2s	2.22697e-12	0.250443	0.971	0.978	4.06333e-08		Ly6e	0.00014971	-0.462428	0.402	0.45	1
Pet100	3.33545e-79	-0.291875	0.703	0.896	6.08586e-75		Bola2	3.19863e-85	-0.297961	0.911	0.94	5.83622e-81		Il13ra1	1.41718e-76	-0.451778	0.028	0.142	2.58578e-72		Abhd5	5.27877e-13	-0.253591	0.699	0.826	9.63164e-09		Tsc22d4	0.000403064	-0.456854	0.184	0.259	1
Romo1	1.12733e-75	-0.28816	0.833	0.941	2.05692e-71		Atp5mpl	9.96299e-86	-0.293632	0.943	0.961	1.81785e-81		Prr5l	3.20623e-65	-0.449942	0.016	0.102	5.85009e-61		Anxa1	1.37561e-10	-0.254549	0.964	0.978	2.50994e-06		Ifitm3	0.00172216	-0.42749	0.146	0.208	1
Hist2h2ac	1.92598e-17	-0.283904	0.523	0.634	3.51414e-13		Ifitm3	1.63191e-28	-0.293014	0.733	0.829	2.97759e-24		Pag1	6.48833e-61	-0.444733	0.282	0.465	1.18386e-56		Inhba	1.07268e-09	-0.255648	0.43	0.594	1.95721e-05		Sec61g	7.26947e-05	-0.421672	0.329	0.408	1
Rpl36	1.10148e-115	-0.283675	0.999	1	2.00976e-111		Hist1h2ae	4.03773e-11	-0.292521	0.79	0.82	7.36725e-07		Tpd52	1.01148e-46	-0.443912	0.424	0.591	1.84554e-42		Hsd11b1	1.1224e-16	-0.263879	0.681	0.851	2.04793e-12		Hist2h2ac	0.00256794	-0.42132	0.177	0.237	1
Tmem256	1.04642e-82	-0.283656	0.869	0.949	1.90929e-78		Prtn3	3.10262e-42	-0.282065	0.257	0.474	5.66105e-38		Lst1	4.28899e-48	-0.433557	0.645	0.782	7.82569e-44		Cox7c	4.2942e-21	-0.270366	0.968	0.995	7.8352e-17		Fam107b	0.000585659	-0.417256	0.077	0.137	1
Uqcr11	7.79874e-76	-0.279274	0.927	0.974	1.42296e-71		Tsc22d4	9.80125e-69	-0.281716	0.87	0.922	1.78834e-64		Dck	6.88872e-43	-0.42288	0.142	0.271	1.25692e-38		Rpl36	4.1071e-06	-0.276442	0.958	0.976	0.0749381		Tpm3	0.00730839	-0.416641	0.244	0.299	1
Clec12a	1.5553e-42	-0.268924	0.615	0.799	2.8378e-38		Romo1	8.71894e-68	-0.279624	0.883	0.906	1.59086e-63		Ighm	5.71588e-66	-0.416822	0.163	0.341	1.04292e-61		Lyz2	3.39226e-07	-0.282523	0.955	0.971	0.00618952		Vps13c	8.16904e-05	-0.4165	0.062	0.126	1
Ifi209	5.70552e-67	-0.266247	0.208	0.485	1.04103e-62		Snhg8	1.01894e-65	-0.27701	0.903	0.935	1.85916e-61		Ogfrl1	2.88512e-51	-0.4135	0.455	0.617	5.26418e-47		Hist1h4h	6.81918e-08	-0.286875	0.558	0.672	0.00124423		Sell	0.00270058	-0.415341	0.063	0.111	1
Hist1h2ab	3.88727e-13	-0.263974	0.349	0.444	7.09272e-09		Snrpf	8.10716e-80	-0.273863	0.978	0.979	1.47923e-75		Lilrb4a	4.57736e-73	-0.413498	0.473	0.682	8.35185e-69		Cst7	1.82094e-09	-0.287808	0.221	0.369	3.32249e-05		Gm10076	4.27088e-05	-0.409722	0.417	0.468	0.779264
Ndufa1	6.30935e-67	-0.262158	0.784	0.914	1.1512e-62		Taf1d	5.84059e-62	-0.270326	0.947	0.96	1.06567e-57		Zfhx3	4.31292e-86	-0.407888	0.089	0.262	7.86936e-82		Ndufa3	1.03506e-28	-0.29409	0.851	0.963	1.88858e-24		Limd2	0.00108186	-0.407834	0.056	0.106	1
Cox17	2.5309e-64	-0.261657	0.82	0.936	4.61789e-60		Pet100	2.87352e-60	-0.263483	0.718	0.835	5.24303e-56		Slc40a1	3.25879e-31	-0.400404	0.243	0.36	5.94598e-27		Hist1h4d	1.03235e-07	-0.294593	0.757	0.858	0.00188363		Celf2	0.0226406	-0.395354	0.101	0.142	1
Cox6c	1.74759e-89	-0.261599	0.979	0.992	3.18866e-85		Trib2	9.64155e-28	-0.262212	0.539	0.666	1.7592e-23		Gda	7.59264e-78	-0.398523	0.816	0.908	1.38535e-73		Tomm7	4.83419e-18	-0.295151	0.832	0.917	8.82047e-14		Tyrobp	0.000448864	-0.395076	0.183	0.262	1
mt-Atp8	2.24925e-64	-0.258173	0.606	0.816	4.10397e-60		Uqcr11	1.04025e-52	-0.261318	0.948	0.958	1.89804e-48		Fth1	5.006e-36	-0.396874	0.956	0.955	9.13395e-32		Orm1	3.96608e-11	-0.300624	0.405	0.555	7.23651e-07		Clec12a	0.00284164	-0.393117	0.062	0.109	1
Klf2	2.59329e-27	-0.254689	0.424	0.598	4.73172e-23		Lgals9	7.48309e-54	-0.260688	0.901	0.936	1.36536e-49		Rpl41	6.80927e-106	-0.388208	0.868	0.956	1.24242e-101		Serpinb1a	7.62572e-21	-0.305088	0.975	0.993	1.39139e-16		Coro1a	0.00196732	-0.391876	0.181	0.246	1
Rpl31	2.80016e-129	-0.253942	0.998	1	5.10918e-125		AY036118	2.76024e-19	-0.258918	0.723	0.798	5.03633e-15		S100a6	1.97379e-67	-0.384623	0.779	0.922	3.60137e-63		Retnlg	4.02038e-09	-0.30768	0.317	0.489	7.33558e-05		Cox6c	1.29985e-05	-0.388533	0.492	0.55	0.23717
Ctla2a	1.95746e-08	0.251047	0.429	0.351	0.000357159		Atp5e	1.81197e-93	-0.256872	0.986	0.983	3.30612e-89		Fcgr4	3.22891e-67	-0.383246	0.107	0.264	5.89146e-63		Ctsg	0.3968	-0.309991	0.475	0.487	1		Rpl35	5.36792e-12	-0.386752	0.666	0.738	9.79432e-08
Ahnak	0.000232983	0.268723	0.436	0.397	1		Kit	5.63859e-26	-0.256618	0.826	0.839	1.02882e-21		Fbxl5	1.98392e-41	-0.379072	0.412	0.566	3.61986e-37		Hist1h3c	2.92403e-06	-0.314782	0.679	0.746	0.0533519		Atp5l	6.11304e-05	-0.386165	0.476	0.521	1
Ly6c2	9.72471e-06	0.279083	0.568	0.657	0.177437		Nrgn	7.18516e-79	0.25053	0.794	0.503	1.311e-74		Ripor2	4.04072e-49	-0.37729	0.414	0.579	7.3727e-45		S100a8	2.48191e-24	-0.318775	1	1	4.52849e-20		Hist1h1d	0.0112476	-0.385373	0.14	0.188	1
Nrgn	2.42314e-13	0.282136	0.438	0.332	4.42126e-09		Rbm3	1.97376e-57	0.251232	0.979	0.94	3.60133e-53		Lilr4b	8.84264e-51	-0.376804	0.446	0.623	1.61343e-46		Plbd1	1.71475e-09	-0.323414	0.36	0.509	3.12872e-05		S100a6	0.00275575	-0.38281	0.097	0.153	1
Car2	2.23822e-18	0.288445	0.612	0.497	4.08385e-14		Gapdh	1.86807e-94	0.265871	0.992	0.968	3.40849e-90		Hk2	1.08509e-48	-0.376354	0.184	0.329	1.97986e-44		Pet100	3.10427e-28	-0.325982	0.654	0.9	5.66404e-24		Hist1h2ap	0.00100684	-0.382173	0.274	0.337	1
Slpi	0.000198493	0.316644	0.602	0.612	1		Tspan8	2.06229e-57	0.281521	0.576	0.349	3.76285e-53		Rpl36	9.58505e-52	-0.37217	0.495	0.664	1.74889e-47		Rpl35	1.20822e-05	-0.327487	0.89	0.941	0.220452		Laptm5	0.0276094	-0.381517	0.145	0.186	1
Adgrg1	3.6222e-29	0.336	0.733	0.616	6.60907e-25		Mmp8	4.06006e-19	0.290709	0.16	0.05	7.40798e-15		Mgam	2.15946e-82	-0.37112	0.053	0.198	3.94015e-78		Sec61g	5.18011e-08	-0.338644	0.857	0.936	0.000945163		Fam111a	0.0189973	-0.378833	0.183	0.228	1
Mmp8	2.8535e-16	0.474257	0.214	0.112	5.2065e-12		Alad	1.79666e-84	0.426419	0.884	0.731	3.27818e-80		Gm10076	2.00636e-54	-0.36955	0.251	0.428	3.66081e-50		Atp5md	1.13947e-22	-0.339827	0.818	0.951	2.07908e-18		Pet100	0.0179637	-0.374201	0.138	0.182	1
Cpa3	3.4269e-28	0.477176	0.308	0.155	6.25272e-24									Isg15	1.75447e-36	-0.368323	0.091	0.196	3.2012e-32		Rpl39	2.47283e-08	-0.342226	0.973	0.99	0.000451193		Igfbp4	0.00567787	-0.36559	0.065	0.109	1
Samsn1	1.41894e-130	0.641023	0.929	0.801	2.589e-126									Zeb2	5.9182e-36	-0.368129	0.082	0.181	1.07984e-31		Rpl41	1.29223e-10	-0.343178	0.992	1	2.35779e-06		Rpl36	4.28337e-13	-0.364623	0.74	0.843	7.81545e-09
Apoe	8.52115e-78	0.721419	0.443	0.165	1.55477e-73									Ifit1bl2	4.07307e-87	-0.36669	0.037	0.17	7.43172e-83		Hk2	2.61094e-30	-0.349007	0.508	0.802	4.76392e-26		Sec63	0.0172286	-0.362526	0.069	0.106	1
														Hdac4	8.76651e-54	-0.364228	0.13	0.276	1.59954e-49		Rpl37	1.33894e-15	-0.35076	0.985	0.998	2.44303e-11		Atp5mpl	0.00348219	-0.361003	0.348	0.392	1
														AY036118	1.58474e-37	-0.35493	0.42	0.573	2.89151e-33		Mt1	0.00108559	-0.35485	0.4	0.457	1		Rpl37a	2.46027e-19	-0.3599	0.881	0.94	4.48901e-15
														Adipor1	3.26347e-40	-0.354664	0.617	0.745	5.95453e-36		Gstm1	5.24613e-05	-0.35869	0.443	0.521	0.957209		Pgam1	0.00601046	-0.356398	0.142	0.197	1
														Lgals1	1.66076e-66	-0.353781	0.053	0.179	3.03023e-62		Atp5k	9.79563e-33	-0.361086	0.873	0.976	1.78731e-28		Ndufa1	0.0947318	-0.35305	0.202	0.228	1
														Gm39321	3.78614e-34	-0.352624	0.074	0.166	6.90819e-30		Ms4a3	4.11824e-07	-0.369319	0.665	0.76	0.00751414		P4hb	0.0598482	-0.3521	0.19	0.224	1
														Hmgb2	1.23123e-116	-0.350265	0.919	0.955	2.2465e-112		Srgn	0.000437371	-0.392213	0.469	0.56	1		Gm42418	5.09613e-24	-0.348972	0.999	1	9.2984e-20
														Cd47	5.54454e-48	-0.347003	0.458	0.618	1.01166e-43		Hist1h2ap	1.21619e-10	-0.402077	0.804	0.89	2.21906e-06		Anapc13	0.24799	-0.348707	0.159	0.175	1
														Selplg	5.14052e-33	-0.344755	0.584	0.702	9.3794e-29		Rpl37a	5.08692e-18	-0.407619	0.995	0.998	9.28159e-14		Pkm	0.0359534	-0.343078	0.142	0.18	1
														Trim30b	3.93345e-38	-0.343149	0.393	0.552	7.17698e-34		Ly6g	5.77184e-07	-0.407984	0.402	0.504	0.0105313		Psmb8	0.0347298	-0.341417	0.167	0.206	1
														Sipa1l1	9.19806e-68	-0.34159	0.046	0.166	1.67828e-63		Rps21	1.66248e-13	-0.431297	0.986	0.995	3.03336e-09		Mlec	0.0932267	-0.34111	0.195	0.226	1
														Slfn1	2.42132e-45	-0.336852	0.58	0.724	4.41794e-41		Ndufb1-ps	5.5163e-59	-0.434043	0.967	0.995	1.0065e-54		Lars2	0.000209176	-0.329852	0.442	0.517	1
														Rplp2	2.01325e-50	-0.336444	0.72	0.833	3.67337e-46		Bola2	6.57608e-19	-0.439579	0.537	0.733	1.19987e-14		Mef2c	0.00767981	-0.329394	0.09	0.137	1
														Syne2	1.35616e-56	-0.33562	0.079	0.207	2.47445e-52		Rpl38	9.15507e-22	-0.442761	0.981	0.993	1.67043e-17		Snrpg	4.13592e-06	-0.328537	0.559	0.614	0.075464
														Lcp1	3.20651e-104	-0.334529	0.949	0.97	5.8506e-100		Rps28	1.46989e-16	-0.46311	0.98	0.995	2.68196e-12		Sox4	0.0457101	-0.325135	0.09	0.124	1
														Fgl2	7.20605e-12	-0.330813	0.163	0.228	1.31482e-07		Rps27	2.78186e-33	-0.470306	0.976	0.993	5.07578e-29		Flna	0.0247178	-0.317582	0.107	0.149	1
														Elane	4.88497e-43	-0.330049	0.117	0.244	8.91312e-39		Rps29	3.4113e-32	-0.489255	1	1	6.22426e-28		Sec61b	0.0438452	-0.314717	0.369	0.381	1
														Atp5k	3.96831e-41	-0.32789	0.347	0.497	7.24059e-37		Fcnb	9.13222e-13	-0.491423	0.929	0.924	1.66626e-08		Rbis	0.0760453	-0.314116	0.143	0.175	1
														Rgs18	8.49165e-42	-0.322601	0.253	0.399	1.54939e-37		Gm10076	1.71065e-22	-0.506934	0.788	0.919	3.12125e-18		Rrbp1	0.251846	-0.312917	0.194	0.211	1
														Cox17	3.29927e-38	-0.322197	0.445	0.59	6.01985e-34		Prtn3	3.08479e-08	-0.533618	0.632	0.804	0.000562851		Stk4	0.0468985	-0.312701	0.108	0.144	1
														H2-K1	5.9497e-28	-0.322056	0.43	0.55	1.08558e-23		S100a6	1.84411e-23	-0.596777	0.187	0.44	3.36476e-19		Hp	0.0679652	-0.310813	0.096	0.126	1
														Clec2d	3.85604e-34	-0.320067	0.133	0.245	7.03573e-30		Wfdc21	9.62962e-57	-0.636331	0.987	0.998	1.75702e-52		Il17ra	0.165649	-0.310672	0.103	0.126	1
														Rpl35a	2.60444e-58	-0.315075	0.791	0.893	4.75205e-54		Mpo	5.99951e-18	-0.691133	0.379	0.631	1.09467e-13		Arhgdib	0.0149696	-0.306971	0.337	0.386	1
														Asnsd1	1.43809e-37	-0.314147	0.157	0.278	2.62393e-33									Rpn1	0.0286331	-0.300365	0.205	0.251	1
														Gm5150	1.99601e-22	-0.313642	0.094	0.173	3.64192e-18									Atp5e	0.00249361	-0.298994	0.489	0.512	1
														Arhgap24	7.04863e-68	-0.313437	0.015	0.103	1.28609e-63									Bola2	0.349026	-0.296687	0.251	0.257	1
														Il4ra	2.20328e-39	-0.312247	0.082	0.186	4.02011e-35									Zfp36l2	0.120016	-0.296644	0.274	0.295	1
														Igkc	1.56254e-33	-0.309372	0.053	0.135	2.85101e-29									Anapc11	0.220938	-0.296396	0.152	0.173	1
														Clec5a	9.08823e-35	-0.309178	0.228	0.358	1.65824e-30									Eif3j1	0.229501	-0.295931	0.275	0.284	1
														Tarm1	5.54072e-44	-0.308901	0.098	0.219	1.01096e-39									Higd2a	0.649083	-0.295707	0.129	0.133	1
														Susd6	1.8019e-29	-0.307181	0.224	0.343	3.28774e-25									Cox7c	0.00044483	-0.293314	0.551	0.568	1
														Il17ra	1.37801e-37	-0.305654	0.539	0.681	2.51432e-33									H2-D1	0.0216705	-0.293302	0.354	0.386	1
														Sdcbp	3.68809e-32	-0.305229	0.44	0.574	6.72928e-28									Ankrd49	0.0536969	-0.29144	0.072	0.102	1
														Rpl36a	2.32175e-23	-0.304262	0.341	0.456	4.23627e-19									Nmt1	0.182319	-0.289882	0.135	0.157	1
														Cyp4f18	5.24589e-28	-0.302268	0.278	0.402	9.57165e-24									Rpl41	2.10003e-13	-0.287354	0.899	0.945	3.83171e-09
														Klra17	7.43135e-86	-0.30198	0.01	0.106	1.35592e-81									Tmem258	0.35178	-0.287325	0.208	0.217	1
														H2-Q10	1.99145e-20	-0.299577	0.153	0.244	3.63361e-16									Npc2	0.811922	-0.285168	0.221	0.213	1
														Bmx	9.67555e-30	-0.297306	0.303	0.428	1.7654e-25									Ctsz	0.503232	-0.283207	0.132	0.14	1
														Ptafr	7.77547e-23	-0.296755	0.211	0.312	1.41871e-18									Grk2	0.191533	-0.282566	0.139	0.162	1
														Slfn2	7.1066e-41	-0.295412	0.769	0.858	1.29667e-36									Foxp1	0.398917	-0.282232	0.139	0.151	1
														Ndufa3	2.1655e-37	-0.29506	0.4	0.545	3.95117e-33									Dynll2	0.0868589	-0.279691	0.119	0.151	1
														Nt5e	8.90389e-74	-0.294728	0.026	0.135	1.6246e-69									Krtcap2	0.285677	-0.278487	0.226	0.239	1
														Rps26	9.24685e-35	-0.292665	0.691	0.802	1.68718e-30									Sec62	0.9724	-0.278265	0.183	0.173	1
														Ptpn12	2.70007e-28	-0.292006	0.174	0.282	4.92654e-24									Pdzd8	0.166261	-0.277882	0.114	0.137	1
														Jaml	3.15417e-19	-0.291923	0.272	0.374	5.7551e-15									Rplp2	4.35843e-10	-0.276016	0.855	0.882	7.95239e-06
														Usp32	3.7987e-28	-0.29154	0.185	0.297	6.9311e-24									Hspa5	0.00344415	-0.275754	0.456	0.501	1
														Gcnt1	6.67888e-32	-0.288991	0.082	0.176	1.21863e-27									mt-Nd4l	0.103806	-0.275037	0.211	0.237	1
														Pet100	1.30591e-37	-0.287827	0.438	0.586	2.38277e-33									Gng12	0.104122	-0.274319	0.086	0.113	1
														Trim30d	1.98157e-27	-0.28548	0.09	0.18	3.61558e-23									Psme1	0.812724	-0.270237	0.288	0.275	1
														Inhba	5.75693e-26	-0.28538	0.101	0.186	1.05041e-21									AY036118	1.45806e-07	-0.268085	0.538	0.665	0.00266038
														Fyb	5.00149e-27	-0.285284	0.548	0.675	9.12571e-23									Anp32a	0.265794	-0.268004	0.295	0.299	1
														S100a8	3.62988e-137	-0.28449	0.999	1	6.62308e-133									Med21	0.989773	-0.267943	0.112	0.109	1
														Plek	4.80818e-30	-0.281747	0.508	0.631	8.773e-26									Limd1	0.283853	-0.267545	0.098	0.115	1
														Kdm7a	2.38912e-23	-0.281716	0.612	0.71	4.35919e-19									Cdk11b	0.169183	-0.266986	0.15	0.175	1
														Tomm7	1.13266e-31	-0.277753	0.334	0.468	2.06666e-27									Dock10	0.126617	-0.266968	0.094	0.12	1
														Sephs2	2.33568e-22	-0.277366	0.206	0.306	4.26168e-18									Dnajc3	0.394357	-0.266361	0.133	0.146	1
														2310001H17Rik	4.92893e-26	-0.277219	0.397	0.519	8.99332e-22									Rpl34	1.73756e-07	-0.265618	0.791	0.84	0.00317036
														2021-03-01	2.47574e-33	-0.276968	0.07	0.16	4.51724e-29									Hist1h4h	0.0495187	-0.26431	0.074	0.106	1
														5830428M24Rik	2.47317e-21	-0.275843	0.085	0.156	4.51254e-17									Xbp1	0.489567	-0.263385	0.097	0.106	1
														Tgfbi	2.94726e-19	-0.275399	0.282	0.38	5.37757e-15									Pdia6	0.141007	-0.261435	0.239	0.262	1
														Gm42418	3.39745e-94	-0.273594	1	1	6.19898e-90									Eapp	0.0668235	-0.261106	0.081	0.111	1
														Slfn8	7.52221e-37	-0.273537	0.05	0.134	1.3725e-32									S100a10	0.0944349	-0.261076	0.198	0.228	1
														Sell	9.63687e-30	-0.272421	0.645	0.753	1.75834e-25									Actr3	0.102651	-0.260888	0.26	0.288	1
														Zyx	3.69495e-32	-0.270821	0.671	0.771	6.74181e-28									Casp3	0.550069	-0.258925	0.208	0.208	1
														Ptma	1.70422e-34	-0.269965	0.67	0.802	3.10952e-30									Gmfg	0.188234	-0.258759	0.206	0.226	1
														Nampt	1.13389e-29	-0.269688	0.133	0.239	2.06889e-25									Pitpna	0.660594	-0.258138	0.146	0.149	1
														Slc38a2	9.39762e-20	-0.268349	0.255	0.356	1.71469e-15									Hbb-bt	0.435615	-0.255119	0.154	0.133	1
														Abcd2	3.1827e-28	-0.265373	0.149	0.251	5.80715e-24									Ube2q1	0.186693	-0.254875	0.086	0.106	1
														4930581F22Rik	7.53798e-16	-0.263943	0.166	0.242	1.37538e-11									Rac2	0.200718	-0.25473	0.228	0.248	1
														Btg1	1.67628e-17	-0.262949	0.757	0.838	3.05855e-13									Rhog	0.671191	-0.250004	0.114	0.118	1
														Gsn	1.36241e-26	-0.260329	0.458	0.576	2.48586e-22									Pmf1	0.00037249	0.250077	0.183	0.106	1
														Siglece	6.84761e-22	-0.260002	0.241	0.341	1.24941e-17									Eef1e1	0.000489531	0.250256	0.169	0.095	1
														St3gal6	1.27048e-23	-0.257568	0.044	0.106	2.31811e-19									Pdpk1	0.0116434	0.251658	0.101	0.06	1
														Crip1	6.05363e-35	-0.256151	0.052	0.134	1.10455e-30									Sap18	0.000340399	0.251664	0.185	0.109	1
														Sirpb1b	5.43422e-25	-0.255755	0.057	0.129	9.91528e-21									Tnpo3	0.0180838	0.251671	0.149	0.102	1
														Rnf11	7.13593e-21	-0.254813	0.241	0.34	1.30202e-16									Klhl12	0.00814779	0.251886	0.104	0.06	1
														Acta2	4.66186e-23	-0.254132	0.073	0.146	8.50602e-19									Sf3b4	0.00230509	0.251935	0.132	0.075	1
														Gabbr1	3.58734e-58	-0.253797	0.019	0.104	6.54547e-54									Abcb4	0.000366049	0.252197	0.236	0.149	1
														Stat1	3.55e-17	-0.252806	0.29	0.384	6.47733e-13									Prmt1	4.60968e-05	0.252504	0.281	0.173	0.841082
														Clec4d	1.21702e-20	-0.252317	0.45	0.557	2.22058e-16									Jtb	0.00101808	0.252536	0.108	0.053	1
														Tsc22d4	8.11973e-33	-0.252083	0.702	0.792	1.48153e-28									Cd44	0.00494061	0.253221	0.152	0.095	1
														Trim30a	1.69601e-24	-0.251725	0.274	0.396	3.09455e-20									Rps18	5.39378e-10	0.253428	0.896	0.82	9.84148e-06
														Atp5md	6.96574e-22	-0.25109	0.321	0.425	1.27097e-17									Ssb	6.59202e-05	0.253505	0.482	0.341	1
														Actb	1.39948e-156	0.250229	0.999	0.995	2.5535e-152									Spen	0.00151467	0.253564	0.174	0.106	1
														Arhgap18	8.72542e-15	0.251063	0.118	0.061	1.59204e-10									Mrpl42	2.3992e-05	0.253925	0.284	0.171	0.437758
														Slc29a3	3.78847e-24	0.251463	0.106	0.035	6.91245e-20									Rpl15	2.41843e-08	0.254449	0.846	0.778	0.000441267
														Sf3b2	1.41917e-29	0.251873	0.657	0.548	2.58942e-25									H2afz	5.03603e-07	0.254735	0.817	0.747	0.00918874
														Add3	2.14998e-20	0.252817	0.495	0.399	3.92285e-16									Fmr1	0.00416049	0.255107	0.183	0.12	1
														Rnf167	5.69092e-13	0.253535	0.399	0.331	1.03837e-08									Tyms	0.000128931	0.256329	0.243	0.149	1
														Pitpna	1.94419e-27	0.253709	0.486	0.367	3.54738e-23									Gstm5	0.00023031	0.25689	0.211	0.124	1
														Hprt	6.36269e-27	0.255556	0.192	0.094	1.16094e-22									Mzt1	0.00808507	0.256968	0.119	0.073	1
														Rpl10	1.1497e-30	0.255702	0.644	0.556	2.09774e-26									Ldb1	0.000228981	0.257074	0.184	0.104	1
														Ywhah	3.94972e-26	0.256359	0.49	0.372	7.20666e-22									Rpl7a	6.77005e-08	0.257169	0.805	0.718	0.00123526
														Arpc2	5.07991e-62	0.256728	0.937	0.892	9.26881e-58									Vegfb	2.10971e-05	0.257359	0.119	0.047	0.384937
														Rybp	3.47676e-19	0.256944	0.239	0.152	6.34369e-15									Rnaseh2c	1.58598e-07	0.257472	0.351	0.197	0.00289377
														Cyba	1.24749e-69	0.257983	0.939	0.915	2.27616e-65									Ewsr1	1.04857e-06	0.257744	0.331	0.191	0.0191322
														Kat2b	1.59196e-19	0.259504	0.195	0.112	2.90469e-15									Srsf3	1.74935e-06	0.258735	0.631	0.472	0.0319186
														Sh3bgrl3	9.84336e-58	0.259992	0.915	0.874	1.79602e-53									Msl1	0.00388311	0.259081	0.14	0.084	1
														Atox1	6.74225e-18	0.263361	0.53	0.442	1.23019e-13									Stard7	0.00799884	0.259778	0.126	0.078	1
														Osbpl8	1.19493e-24	0.26392	0.358	0.249	2.18026e-20									Dut	6.00376e-06	0.259815	0.521	0.361	0.109545
														Gm34084	3.74954e-28	0.264013	0.477	0.341	6.84142e-24									Nt5c3	0.00300854	0.259896	0.121	0.069	1
														Supt4a	2.7441e-26	0.264016	0.544	0.422	5.00688e-22									Hnrnpf	4.51558e-08	0.260759	0.6	0.401	0.000823913
														5031439G07Rik	1.73548e-25	0.264378	0.265	0.154	3.16656e-21									Cdk2ap1	0.000164498	0.260798	0.163	0.086	1
														Borcs6	4.30135e-23	0.264386	0.283	0.18	7.84825e-19									Cfap97	0.000317317	0.261269	0.105	0.047	1
														Qk	5.75081e-16	0.266543	0.362	0.277	1.04929e-11									Rnaseh2b	1.1355e-05	0.261365	0.188	0.093	0.207184
														Pdia3	2.85968e-22	0.266599	0.366	0.273	5.21777e-18									Lap3	0.000103012	0.261599	0.16	0.082	1
														Smap1	1.93209e-24	0.266818	0.339	0.23	3.52529e-20									Thyn1	0.00123098	0.261669	0.115	0.06	1
														Mmp25	3.91918e-29	0.267108	0.606	0.485	7.15093e-25									Tspo2	6.45152e-05	0.262033	0.174	0.091	1
														Rsrp1	3.14491e-33	0.267144	0.761	0.671	5.73821e-29									Cks1b	0.000129121	0.262163	0.319	0.211	1
														Rfx7	3.19004e-27	0.268015	0.194	0.095	5.82055e-23									Timm13	1.91589e-05	0.262239	0.351	0.222	0.349573
														Fis1	1.94849e-33	0.26856	0.656	0.546	3.55522e-29									Otud4	0.00251751	0.262635	0.147	0.089	1
														Hrh2	5.83295e-20	0.268775	0.202	0.117	1.06428e-15									Fam162a	0.000158523	0.263074	0.213	0.126	1
														Hnrnpf	1.37271e-29	0.269634	0.627	0.514	2.50464e-25									Ankrd17	0.00215383	0.263481	0.24	0.164	1
														Mcemp1	1.65965e-51	0.269919	0.905	0.849	3.02819e-47									Gata1	0.000874473	0.263533	0.147	0.084	1
														Rhoa	1.52441e-51	0.26996	0.837	0.751	2.78144e-47									Chchd10	3.09973e-06	0.264048	0.247	0.133	0.0565577
														Atxn10	1.08004e-27	0.271687	0.575	0.473	1.97064e-23									Spr	0.000527356	0.264388	0.111	0.053	1
														Gm34680	7.41698e-24	0.272288	0.237	0.139	1.3533e-19									Retnlg	0.308415	0.264513	0.288	0.255	1
														Cyb5a	3.65951e-27	0.274101	0.227	0.122	6.67714e-23									Ubn1	0.000371445	0.265491	0.176	0.102	1
														Samd8	1.5163e-22	0.274154	0.254	0.156	2.76664e-18									Mia2	0.00865908	0.265798	0.199	0.14	1
														Gpr137c	2.34694e-45	0.274155	0.125	0.022	4.28223e-41									Zcchc17	3.67839e-05	0.266037	0.178	0.091	0.671159
														Tmx3	3.07427e-25	0.276134	0.358	0.248	5.60931e-21									Polr1c	0.0010768	0.26637	0.15	0.086	1
														Arl4c	9.01756e-23	0.276253	0.108	0.039	1.64534e-18									Syne1	0.00218946	0.266666	0.136	0.078	1
														Ogt	1.99813e-29	0.276629	0.7	0.591	3.64579e-25									Tmem234	4.56427e-05	0.267792	0.292	0.182	0.832796
														Myadm	3.79179e-29	0.276633	0.415	0.275	6.9185e-25									Abca3	0.00500559	0.267844	0.115	0.067	1
														Ckap4	3.71978e-47	0.27732	0.801	0.689	6.78712e-43									Cyb5a	1.36164e-05	0.26791	0.233	0.129	0.248445
														Cox4i1	2.04549e-39	0.278262	0.779	0.699	3.73221e-35									Capns1	7.23387e-06	0.267917	0.215	0.113	0.131989
														Oaz1	1.04915e-59	0.27846	0.862	0.79	1.91429e-55									Ppp3cb	0.00281279	0.268895	0.16	0.1	1
														Tram1	2.22415e-28	0.278991	0.348	0.229	4.05819e-24									Selenok	0.00240595	0.269136	0.18	0.115	1
														Nr3c1	1.87237e-30	0.279143	0.508	0.376	3.41632e-26									Klf3	0.000359987	0.269201	0.164	0.091	1
														Jund	4.68132e-15	0.279422	0.549	0.477	8.54155e-11									Lars	8.36863e-06	0.269429	0.201	0.1	0.152694
														Spn	1.98544e-32	0.28035	0.208	0.097	3.62263e-28									Eif4b	4.22496e-06	0.269858	0.351	0.215	0.0770887
														Luc7l2	5.34979e-31	0.286286	0.615	0.496	9.76122e-27									Ptdss2	0.000586185	0.270493	0.114	0.055	1
														Apoc2	3.27269e-29	0.286806	0.124	0.04	5.97134e-25									Selenow	0.000257037	0.270602	0.229	0.142	1
														Ccdc125	3.51417e-23	0.288487	0.397	0.296	6.41195e-19									Nfe2	0.00883528	0.271094	0.117	0.071	1
														Ccdc12	1.28815e-20	0.289121	0.534	0.451	2.35035e-16									Mrpl50	0.00175693	0.271515	0.154	0.093	1
														Ctsd	5.08154e-32	0.29054	0.85	0.774	9.27178e-28									Vamp8	1.96973e-06	0.272307	0.34	0.206	0.0359396
														Sfmbt2	1.07408e-27	0.290594	0.109	0.033	1.95976e-23									Max	0.00232743	0.272833	0.14	0.082	1
														Btg2	1.31478e-28	0.291303	0.746	0.657	2.39895e-24									Csnk2b	0.00012197	0.272834	0.258	0.162	1
														mt-Co3	1.61966e-63	0.292883	0.895	0.854	2.95523e-59									Usp15	0.000120166	0.272997	0.299	0.193	1
														Chchd2	8.16255e-50	0.293211	0.746	0.635	1.48934e-45									Cd81	4.568e-06	0.273155	0.201	0.1	0.0833477
														Map7d1	8.34299e-19	0.293982	0.296	0.205	1.52226e-14									Psip1	1.05114e-05	0.273393	0.323	0.197	0.191791
														Cbl	4.86522e-37	0.295334	0.661	0.549	8.87708e-33									Srsf11	9.78458e-06	0.273824	0.33	0.202	0.178529
														Stk10	3.7163e-22	0.299686	0.42	0.319	6.78076e-18									Fkbp4	4.10306e-06	0.273983	0.397	0.253	0.0748645
														Mapk13	1.93749e-32	0.301666	0.404	0.274	3.53514e-28									Hras	2.91748e-05	0.274226	0.177	0.089	0.532324
														Pkm	1.387e-61	0.303829	0.895	0.824	2.53071e-57									N4bp2l2	0.000567213	0.274249	0.174	0.102	1
														Spp1	1.69409e-41	0.303965	0.114	0.019	3.09103e-37									Ndufb9	9.493e-05	0.27445	0.421	0.297	1
														Ap1s2	7.40265e-28	0.307195	0.523	0.41	1.35069e-23									Tspan33	0.00136208	0.274551	0.195	0.124	1
														Kif23	3.77659e-23	0.308481	0.193	0.102	6.89076e-19									Epor	0.00278007	0.274907	0.121	0.069	1
														Pik3r6	5.88316e-26	0.309147	0.25	0.144	1.07344e-21									Psmd3	4.46323e-06	0.275312	0.211	0.106	0.0814361
														Rabac1	8.82622e-35	0.309842	0.568	0.435	1.61043e-30									Txndc17	0.00018762	0.275445	0.197	0.113	1
														Eif1	5.9738e-72	0.30989	0.966	0.936	1.08998e-67									Btaf1	0.000280771	0.275651	0.202	0.12	1
														Chil3	5.77986e-14	0.311312	0.555	0.483	1.05459e-09									Cpsf3	0.00102161	0.276323	0.114	0.058	1
														Hspa5	1.08586e-20	0.314289	0.466	0.381	1.98127e-16									Tspan32	0.00456988	0.27671	0.143	0.089	1
														Pim1	6.79125e-08	0.316208	0.422	0.378	0.00123913									Mrpl32	0.00154856	0.276725	0.18	0.113	1
														Anxa5	8.64499e-39	0.316965	0.299	0.164	1.57737e-34									Rhd	0.000652952	0.276845	0.166	0.095	1
														Sema4d	1.14036e-28	0.317106	0.353	0.234	2.0807e-24									Mrps10	0.00256005	0.278066	0.128	0.073	1
														Ubb	3.0597e-70	0.318621	0.931	0.881	5.58272e-66									Emc6	0.000210141	0.278189	0.206	0.122	1
														Rpl13	1.03088e-82	0.321892	0.923	0.847	1.88095e-78									Hdac1	0.000546452	0.278205	0.185	0.111	1
														Cflar	2.42165e-28	0.324578	0.401	0.281	4.41855e-24									Hspa9	3.39307e-05	0.278326	0.357	0.233	0.619099
														Cdk2ap2	2.58302e-43	0.327322	0.758	0.648	4.71297e-39									Gfi1b	0.00175784	0.278451	0.154	0.093	1
														Gadd45b	6.14891e-25	0.327603	0.211	0.112	1.12193e-20									Snhg4	2.709e-05	0.279424	0.206	0.111	0.494285
														Prdx5	1.09733e-84	0.330568	0.927	0.894	2.00219e-80									Cnbp	1.33848e-05	0.279946	0.438	0.295	0.24422
														Aprt	5.38508e-33	0.33068	0.451	0.333	9.82562e-29									Cenpa	1.92613e-07	0.280012	0.331	0.182	0.00351442
														Rps6ka1	4.97953e-35	0.336497	0.469	0.343	9.08565e-31									Scand1	3.06226e-05	0.281042	0.275	0.166	0.558741
														Ubl3	1.67008e-39	0.339865	0.61	0.486	3.04723e-35									Ubn2	0.0110616	0.281392	0.16	0.109	1
														Sort1	8.43743e-44	0.342097	0.362	0.21	1.53949e-39									Rpl13a	1.20283e-10	0.281737	0.892	0.82	2.19469e-06
														Tuba1c	2.82878e-43	0.342429	0.203	0.076	5.16138e-39									Ppid	0.00197276	0.281757	0.294	0.211	1
														H2afz	5.31485e-38	0.342892	0.77	0.703	9.69747e-34									Josd2	0.00187534	0.281856	0.146	0.086	1
														Nbeal2	3.40269e-32	0.343693	0.415	0.286	6.20855e-28									Icam4	4.59544e-05	0.281998	0.108	0.042	0.838484
														Mob3b	1.59145e-51	0.343997	0.102	0.004	2.90376e-47									Brd4	0.000185482	0.28246	0.211	0.124	1
														Jun	1.42507e-15	0.347651	0.325	0.244	2.60018e-11									Eprs	6.96545e-05	0.282475	0.355	0.237	1
														Arpc3	1.0793e-93	0.348589	0.904	0.837	1.96929e-89									U2af1	1.06682e-05	0.283503	0.312	0.186	0.194652
														Trem3	1.08848e-52	0.348764	0.674	0.532	1.98604e-48									Nrgn	5.63348e-06	0.283687	0.139	0.055	0.102788
														Cited2	8.2349e-30	0.349329	0.411	0.289	1.50254e-25									Dnajc19	9.55915e-05	0.283835	0.208	0.12	1
														Rsl24d1	5.34662e-43	0.350841	0.174	0.057	9.75544e-39									Slc25a51	0.00704543	0.284069	0.131	0.082	1
														E2f2	4.78879e-29	0.351329	0.397	0.28	8.73763e-25									Ifitm6	0.0084066	0.284088	0.122	0.073	1
														Cebpe	2.2534e-26	0.353901	0.436	0.332	4.11155e-22									Tomm20	6.9902e-06	0.28505	0.403	0.268	0.127543
														Nfam1	8.95642e-60	0.358723	0.894	0.813	1.63419e-55									Emg1	4.1615e-05	0.286666	0.294	0.184	0.759307
														Lgals3	7.45947e-65	0.358965	0.821	0.772	1.36106e-60									Nrip1	0.00684615	0.286709	0.131	0.08	1
														Pttg1	4.99948e-18	0.361347	0.138	0.07	9.12206e-14									Fam192a	0.00102043	0.287374	0.117	0.06	1
														Ptprj	2.90482e-35	0.362643	0.262	0.141	5.30013e-31									2610507B11Rik	0.000125633	0.287636	0.153	0.078	1
														H3f3b	1.62368e-90	0.363808	0.974	0.947	2.96258e-86									Ptpa	6.69398e-05	0.290274	0.247	0.149	1
														Gfpt1	1.53957e-44	0.366236	0.298	0.152	2.80911e-40									Snhg1	1.29413e-05	0.290619	0.312	0.191	0.236128
														Hist1h2bc	9.36266e-09	0.366362	0.296	0.244	0.000170831									Dnaja3	0.000508171	0.290678	0.103	0.047	1
														Camp	2.44045e-23	0.367339	0.811	0.746	4.45284e-19									mt-Co3	1.80579e-06	0.291737	0.829	0.756	0.0329485
														Krt80	3.10444e-36	0.373522	0.126	0.033	5.66436e-32									Bcas2	0.000153532	0.292519	0.271	0.175	1
														Arpc1b	4.1473e-143	0.377999	0.95	0.904	7.56717e-139									Hemgn	8.77149e-05	0.292531	0.247	0.151	1
														Prr13	8.94816e-70	0.379826	0.904	0.828	1.63268e-65									Nt5c	0.000394463	0.293395	0.154	0.084	1
														D1Ertd622e	1.55149e-28	0.38277	0.544	0.43	2.83085e-24									Pabpn1	5.61065e-06	0.294251	0.371	0.235	0.102372
														Rflnb	4.58231e-69	0.385367	0.741	0.611	8.36089e-65									Snu13	5.67809e-05	0.294364	0.386	0.268	1
														Gpr27	3.15462e-46	0.386212	0.27	0.126	5.75591e-42									Sfpq	2.03632e-05	0.294795	0.507	0.361	0.371547
														Dock8	8.33412e-64	0.387213	0.698	0.547	1.52064e-59									Rps4x	3.55117e-11	0.294963	0.91	0.874	6.47947e-07
														Rgs3	9.76992e-34	0.389085	0.311	0.182	1.78262e-29									Sumo2	1.95145e-05	0.296016	0.472	0.333	0.356062
														Gpx1	2.01999e-130	0.392515	0.946	0.9	3.68568e-126									Ormdl2	7.83135e-05	0.296334	0.14	0.067	1
														Csf1r	1.19868e-32	0.39309	0.224	0.108	2.18712e-28									Dcaf8	0.000783887	0.296824	0.202	0.126	1
														Dok2	4.02579e-67	0.393338	0.228	0.064	7.34546e-63									Imp3	0.000109158	0.297813	0.275	0.175	1
														Lsp1	1.21859e-91	0.395466	0.942	0.882	2.22344e-87									Gapvd1	0.00618749	0.297949	0.18	0.122	1
														Pglyrp1	3.54763e-197	0.39563	0.983	0.949	6.473e-193									Rpl8	2.38678e-15	0.299617	0.941	0.84	4.35491e-11
														Emp3	5.01996e-60	0.398869	0.671	0.526	9.15942e-56									Fis1	5.50971e-05	0.300077	0.282	0.177	1
														Gapdh	1.48292e-136	0.399058	0.912	0.839	2.70573e-132									Npm1	8.62847e-12	0.300178	0.913	0.807	1.57435e-07
														Fnip2	2.34314e-52	0.401896	0.19	0.053	4.27529e-48									Cct7	7.11642e-06	0.300692	0.4	0.259	0.129846
														Rogdi	4.09621e-51	0.412795	0.308	0.152	7.47395e-47									Mrps33	0.000198392	0.301673	0.243	0.153	1
														Abcg1	1.77841e-50	0.413146	0.227	0.081	3.24489e-46									Ppia	2.1097e-13	0.301747	0.944	0.851	3.84936e-09
														Gpx4	2.90842e-70	0.413399	0.756	0.611	5.3067e-66									Gspt1	9.83558e-07	0.301809	0.374	0.228	0.017946
														Dmwd	1.55699e-53	0.415424	0.23	0.083	2.84088e-49									Snx3	0.000374745	0.301928	0.301	0.204	1
														Ifitm2	3.86699e-28	0.421049	0.88	0.834	7.05571e-24									Pigq	0.00141072	0.303712	0.118	0.062	1
														Ccnd3	4.70606e-90	0.425167	0.783	0.623	8.58667e-86									Vamp5	6.72735e-06	0.304054	0.36	0.226	0.122747
														Mppe1	5.44519e-58	0.435049	0.346	0.178	9.9353e-54									Atp5g1	7.71333e-07	0.304555	0.531	0.373	0.0140737
														Smim14	2.03327e-51	0.438814	0.444	0.297	3.70991e-47									Timm9	0.000136612	0.305188	0.174	0.095	1
														Hmgn2	9.04018e-65	0.445431	0.665	0.521	1.64947e-60									Cdc6	8.20551e-05	0.305859	0.18	0.095	1
														Prdx6	7.78632e-75	0.448854	0.599	0.424	1.42069e-70									Zfpm1	2.23384e-05	0.307345	0.275	0.166	0.407587
														Klf9	1.71798e-64	0.461591	0.167	0.027	3.13462e-60									Larp1b	0.000164902	0.307623	0.136	0.067	1
														Tbl1x	4.41257e-50	0.463043	0.207	0.072	8.05118e-46									Cenpv	0.000163205	0.307927	0.133	0.064	1
														Zfp36l1	1.73819e-57	0.464311	0.299	0.124	3.1715e-53									mt-Co2	1.20754e-06	0.309845	0.768	0.667	0.0220329
														Ppp2r5a	2.65518e-100	0.485935	0.793	0.618	4.84465e-96									Psma5	1.03448e-05	0.311149	0.346	0.222	0.188751
														Clec4a2	1.48132e-77	0.48662	0.654	0.527	2.70282e-73									Ifrd2	4.41951e-06	0.311162	0.228	0.12	0.0806384
														Lims1	2.07453e-93	0.488831	0.697	0.508	3.78519e-89									Pcna	6.14074e-06	0.312628	0.501	0.35	0.112044
														Sntb2	2.71589e-61	0.49929	0.329	0.151	4.95541e-57									Psma3	1.93031e-07	0.312771	0.404	0.244	0.00352204
														Kmt5a	1.59726e-88	0.520508	0.585	0.386	2.91435e-84									Cdk17	0.000782344	0.313555	0.115	0.058	1
														Capns1	3.5405e-92	0.52179	0.599	0.381	6.46e-88									Rpl10	5.44528e-08	0.313725	0.74	0.641	0.000993547
														Scnn1a	3.71094e-81	0.523311	0.325	0.111	6.77098e-77									Rpl29	1.27172e-09	0.31453	0.756	0.641	2.32038e-05
														Ptms	1.99697e-71	0.543446	0.371	0.17	3.64368e-67									Nfia	0.000287459	0.316555	0.192	0.113	1
														Nin	7.61751e-101	0.547784	0.633	0.41	1.38989e-96									Cyth3	0.0674163	0.316712	0.15	0.115	1
														G0s2	1.11782e-57	0.552172	0.463	0.288	2.03957e-53									Ugcg	0.000208089	0.317058	0.237	0.149	1
														Rap1b	5.0194e-146	0.567111	0.828	0.642	9.15839e-142									Exosc7	5.49373e-06	0.318313	0.205	0.104	0.100239
														Hcar2	3.11368e-70	0.574745	0.286	0.098	5.68122e-66									Camp	8.49544e-06	0.318523	0.66	0.53	0.155008
														Slc2a3	1.98111e-127	0.588441	0.849	0.668	3.61474e-123									Cct3	5.11961e-06	0.319972	0.375	0.235	0.0934124
														Acot1	5.63521e-112	0.600113	0.233	0.022	1.0282e-107									Srsf1	5.89445e-07	0.320581	0.354	0.211	0.010755
														Itpkb	1.90688e-97	0.604254	0.353	0.12	3.4793e-93									Cox6b2	7.6153e-06	0.320704	0.233	0.126	0.138949
														Klf2	7.84788e-127	0.608256	0.766	0.533	1.43192e-122									Gm16286	1.81198e-06	0.320984	0.261	0.142	0.0330613
														Neurl3	4.51825e-80	0.611914	0.543	0.322	8.244e-76									Ssx2ip	0.00706262	0.322239	0.121	0.073	1
														Ube2h	1.28768e-72	0.624821	0.469	0.272	2.3495e-68									Rpl9	2.80644e-13	0.322553	0.885	0.796	5.12062e-09
														Ly6g	5.16319e-118	0.655556	0.807	0.633	9.42076e-114									Sfxn1	0.000174726	0.323624	0.256	0.162	1
														9830166K06Rik	2.42368e-131	0.656254	0.342	0.079	4.42225e-127									Selenbp1	0.000188995	0.325802	0.15	0.08	1
														Mdh2	2.41011e-122	0.662753	0.626	0.371	4.39749e-118									Oaz1	5.48881e-09	0.325891	0.699	0.55	0.000100149
														Hhex	1.85032e-128	0.692565	0.49	0.216	3.3761e-124									Fam241a	6.51877e-05	0.326447	0.187	0.102	1
														Gm21188	1.46481e-140	0.693749	0.417	0.132	2.67269e-136									Phip	0.000934081	0.327017	0.242	0.16	1
														Dennd4a	1.66667e-70	0.705753	0.416	0.225	3.04101e-66									Gar1	2.55032e-05	0.327074	0.235	0.135	0.465331
														Clec4a1	4.09039e-98	0.707161	0.194	0.011	7.46332e-94									Atp8a1	4.49441e-05	0.32788	0.178	0.093	0.82005
														Ces1d	4.51928e-149	0.708469	0.273	0.014	8.24589e-145									Apoe	9.09387e-05	0.328046	0.202	0.113	1
														Slc3a2	5.00883e-116	0.709243	0.414	0.155	9.13911e-112									Mrpl53	0.00025261	0.328153	0.145	0.075	1
														Zfp652	4.54092e-130	0.733368	0.531	0.248	8.28536e-126									Rnf4	0.000245879	0.328344	0.18	0.102	1
														Mgst2	4.29701e-137	0.745638	0.55	0.286	7.84033e-133									Esyt2	4.60754e-05	0.328466	0.132	0.058	0.840691
														Chil1	4.6377e-303	0.800205	0.874	0.612	8.46194e-299									Cox14	1.28141e-06	0.328854	0.185	0.084	0.0233805
														Ldhc	2.84994e-168	0.81862	0.346	0.049	5.19999e-164									Nudt4	3.31934e-05	0.329625	0.213	0.118	0.605646
														Rilpl2	1.14625e-144	0.824394	0.392	0.104	2.09145e-140									Ran	8.79571e-08	0.331178	0.708	0.579	0.00160486
														Dgkh	3.15161e-157	0.826411	0.604	0.303	5.75042e-153									Asns	0.000196735	0.331257	0.17	0.093	1
														Satb1	2.29093e-163	0.826984	0.579	0.267	4.18002e-159									Acyp1	0.000136062	0.333183	0.133	0.064	1
														Cdc42ep2	3.92889e-150	0.835272	0.376	0.085	7.16866e-146									Ttll12	0.00105246	0.334092	0.154	0.091	1
														Prok2	8.9796e-99	0.851692	0.284	0.07	1.63842e-94									Nadk	0.000478376	0.335524	0.14	0.075	1
														Slc22a15	7.26377e-218	0.918273	0.688	0.33	1.32535e-213									Timm8a1	7.42971e-06	0.338037	0.25	0.14	0.135562
														Apoe	2.16231e-61	0.942498	0.229	0.072	3.94536e-57									Pglyrp1	0.00198509	0.33946	0.17	0.102	1
														Mmp8	0	1.27388	0.947	0.788	0									Mrpl46	3.29123e-05	0.341682	0.122	0.051	0.600518
														Grap	0	1.39144	0.525	0.002	0									Chchd2	1.42948e-08	0.344464	0.656	0.492	0.000260822
														Mcam	0	1.46157	0.516	0.022	0									Klf1	5.37173e-07	0.347712	0.261	0.137	0.00980126
																												Ndufc2	9.51013e-06	0.349089	0.379	0.251	0.173522
																												Uri1	3.83818e-05	0.349997	0.183	0.095	0.700315
																												Kcnq1ot1	0.00346284	0.350118	0.298	0.217	1
																												Prr13	0.000160333	0.351105	0.169	0.091	1
																												Rps2	6.96833e-12	0.351324	0.897	0.807	1.27144e-07
																												Prdx2	1.0191e-07	0.35169	0.555	0.386	0.00185946
																												Ccdc124	6.15463e-06	0.354103	0.18	0.086	0.112297
																												Map2k2	9.22252e-06	0.355043	0.181	0.089	0.168274
																												Ash1l	0.000494047	0.355088	0.202	0.124	1
																												Srek1	9.44647e-05	0.356939	0.192	0.106	1
																												Luc7l2	9.24948e-07	0.357616	0.419	0.268	0.0168766
																												Atp13a3	0.000199904	0.359177	0.246	0.155	1
																												Prdx6	2.90115e-07	0.360599	0.435	0.275	0.00529343
																												mt-Cytb	3.55155e-07	0.360761	0.626	0.466	0.00648015
																												Gpx4	3.11268e-08	0.361136	0.493	0.319	0.000567939
																												Stx2	0.000332602	0.364666	0.147	0.08	1
																												Gadd45gip1	5.54407e-07	0.380691	0.292	0.164	0.0101157
																												Ccnl2	0.000136958	0.380931	0.166	0.089	1
																												Car2	2.3036e-15	0.381728	0.816	0.561	4.20316e-11
																												Hmgb3	2.19626e-07	0.384073	0.337	0.195	0.0040073
																												Eif2s3x	4.97854e-07	0.386784	0.216	0.102	0.00908385
																												Gm26917	0.014019	0.390185	0.279	0.22	1
																												Glrx5	2.7082e-11	0.393157	0.485	0.268	4.94138e-07
																												Gclc	0.000277149	0.395166	0.14	0.073	1
																												Tspan8	3.30516e-08	0.405	0.147	0.047	0.000603059
																												Psmd11	3.9391e-07	0.410072	0.272	0.146	0.00718728
																												Gm47283	1.71111e-06	0.414804	0.177	0.078	0.0312209
																												Ank1	4.26849e-05	0.422705	0.154	0.075	0.778828
																												Prdx3	2.73599e-07	0.425502	0.216	0.102	0.00499208
																												Sdhd	3.24884e-06	0.429426	0.256	0.146	0.0592783
																												Ermap	3.83191e-07	0.433035	0.358	0.217	0.0069917
																												Tpm1	2.24459e-07	0.436864	0.17	0.067	0.00409548
																												Erh	3.26973e-07	0.443319	0.221	0.106	0.00596595
																												Minpp1	5.14366e-08	0.446988	0.317	0.171	0.000938512
																												Rsrp1	1.45744e-06	0.449164	0.279	0.16	0.0265925
																												Aqp1	1.14962e-09	0.481958	0.375	0.206	2.09761e-05
																												Tmem14c	4.65008e-12	0.484515	0.501	0.29	8.48453e-08
																												Alad	1.61637e-12	0.487971	0.372	0.177	2.94923e-08
																												C1qtnf12	2.37604e-10	0.491168	0.358	0.18	4.33532e-06
																												Blvrb	2.12006e-15	0.543659	0.486	0.246	3.86825e-11
																												Car1	8.99123e-31	0.809013	0.684	0.353	1.64054e-26
																												Mmp8	1.33288e-13	1.22747	0.187	0.038	2.43197e-09
																												Pf4	1.3324e-08	1.55505	0.156	0.049	0.00024311

## Sheet: ST7
Supplemental Table 7. Enrichr results for differentially expressed genes in sc-RNA-seq partitions.
Partition	Name	P-value	Adjusted p-value	Odds Ratio	Combined score	Gene list
HSC/MPP/GMP/CLP down in fusion	CD34+ CELL	1.274e-05	0.0001608	3.66	41.24	RPL41, MS4A3, RPL31, DNTT, FOS, MT-ATP8, HIST2H2AC, RPS27, RPS29, RPL37A, RPL36, RPL35, RPL38, PRTN3, ROMO1, RPL37, RPL39, RPS21, ELANE
	Basophils	1.384e-05	0.0008165	13	145.43	IFITM1, MS4A3, CLEC12A, F13A1, MPEG1, CCR2
	Neutrophils	0.000105	0.003099	11.89	108.94	CLEC12A, PRTN3, MPEG1, ELANE, CCR2
	Monocytes	0.000215	0.004229	10.14	85.63	CLEC12A, FN1, PRTN3, MPEG1, CCR2
	MYC 19030024 ChIP-ChIP MESCs Mouse	8.907e-07	0.0005077	3.69	51.34	RPS21, RPL41, RPL36, RPS27, RPL37, RPL39, RPL35, CCND1, RPL38, ATP5E, RPL37A, RPL31, RPS28, RPS29, COX6C, SNRPG
HSC/MPP/GMP/CLP UP in fusion	SOX3 22085726 ChIP-Seq MUSCLE Mouse	0.002742	0.7834	7.52	44.34	LY6C2, CAR2, AHNAK, SLPI,MMP8
	GATA1 19941827 ChIP-Seq MEL Mouse	0.01374	0.7834	5.67	24.31	CAR2, AHNAK, APOE, MMP8
	GATA1 megakaryocyte mm9	0.006055	0.5106	10.15	51.85	CTLA2A, SAMSN1, NRGN
	ZNF384 MEL cell line mm9	0.08951	0.8453	3.38	8.15	CPA3, APOE, SAMSN1
MPP/MEP Down in fusion	Hematopoietic stem cells in Liver	0.0001592	0.004617	32.63	285.38	KIT, PRTN3, MPO
	Granulocyte-Macrophage Progenitor Cell (Gmp) (id:259)	0.003939	0.08743	10.16	56.28	PRTN3, LGALS9, MPO
	CD34+ CELL	5.753e-06	9.013e-05	3.75	45.29	TSC2204, RPL41, TSC22D1, FOS, MPO, PLAC8, RPS28, RPS27, RPS29, RPL37A, KIT, RPL36, RPL35, ROMO1, PRTN3, RPL38, RPL37, LGALS9, RPS21, RPL39, SOX4
	MYC 19030024 ChIP-ChIP MESCs Mouse	2.26e-05	0.006431	3.06	32.71	IFITM3, COX17, COX7C, ATP5E, RPL36, RPL35, RPL38, RPL37, RPL39, HIST1H3C, RPL41, TSC2D1, NDUFA3, MT2, MT1, FOS, CD24A, RPS28, RPS27, RPS29, RPL37A, BOLA2, KIT, SNRPG, TOMM7, RPS21, TRIB2
Neutrophil down in fusion	Myeloid cells in Pancreas	4.267e-14	3.542e-12	12.35	380.16	CCR1, RGS18, IL1RN, CSF3R, IL1R2, LST1, PLEK, FGL2, PTAFR, MPO, MPEG1, OGFRL1, IL1B, CLEC5A, TARM1, PRTN3, CD300LF, S100A8, CD33
	Dendritic Cell Type 3 (Dc3) (id:157)	4.463e-14	5.524e-12	22.55	693.17	CCR1, RGS18, CSF3R, LST1, PLEK, FGL2, PTAFR, CSF2RB, MPEG1, CLEC4D, JAML, CLEC5A, CD300LF, S100A8
	Monocyte (id:423)	5.908e-14	5.524e-12	22.04	671.35	CCR1, RGS18, CSF3R, LST1, PLEK, FGL2, PTAFR, CSF2RB, MPEG1, CLEC4D, JAML, S100A6, CD300LF, S100A8
	Neutrophils	1.308e-20	1.243e-18	23.77	1088.11	CCR1, RGS18, CSF3R, IL1R2, LST1, PLEK, PTAFR, CSF2RB, MPO, MPEG1, BST1, CLEC4D, JAML, SELL, IL1B, PRTN2, CLEC4E, CD300LF, S100A8, ELANE, CD33
	Basophils	2.84e-13	6.745e-12	14.82	428	CCR1, RGS18, CSF3R, IL1RN, GABBR1, FGL2, PLEK, PTAFR, CSF2RB, MPEG1, CLEC4D, JAML, CLEC5A, CD300LF, S100A8, CD33
	Macrophages	5.213e-12	7.075e-11	12.04	312.68	CCR1, CD84, CSF3R, FGL2, LST1, PLEK, PTAFR, CSF2RB, MPEG1, CLEC4D, JAML, IL1B, CLEC5A, CD300LF, S100A8, CD33
	MYC CHEA	0.01399	0.2215	2.36	10.08	RPS27, RPS29, RPL37A, RPL36, RPL36A, RPLP2, RPL38, RPL37, RPS21, PTMA
Neutrophil up in fusion	Promyelocyte (id:521)	0.0001813	0.01534	7.93	68.29	DOK2, CEBPE, NFAM1, PROK2, MCEMP1, CAMP
	Myelocyte (id:431)	0.0002661	0.01534	7.35	60.52	HCAR2, NFAM1, MCEMP1, PGLYRP1, MMP8, CAMP
	Apoptosis	7.814e-05	0.0008205	6.27	59.32	LGALS3, JUN, BTG2, GPX1, GADD45B, GPX4, SATB1, CFLAR
	GATA2 CHEA	1.066e-10	1.055e-08	4.99	114.53	BTG2, KRT80, CEBPE, DOCK8, NR3C1, TUB1AC, CCND3, HHEX, RGS3, PIM1, E2F2, SH3BGRL3, HMGN2, FIS1, JUN, GPX1, CCDC12, SEMA4D, DENND4A, PPP2R5A, CFLAR, KLF2, MAPK13, DOK2, PKM, RYBP, KLF9, ABCG1
	KLF4 CHEA	6.096e-09	2.29e-07	3.99	75.56	IFITM2, RPL10, CITED2, PTPRJ, SLC2A3, SLC2A2, ACTB, ZFP36L1, LGALS3, TUBA1C, UBB, RPS6KA1, PIM1, SPP1, APOE, TBLX1, YWHAH, CYB5A, JUND, GPX1, ANXA5, KLF2, RNF167, PKM, RYBP, KLF9, OGT, GAPDH, LUC7L2
	SPI1 CHEA	6.941e-09	2.29e-07	3.87	72.73	CSF1R, SAMD8, RPL10, CITED2, ARPC1B, DOCK8, PTPRJ, SLC3A2, LSP1, OAZ1, TUBA1C, CCND3, HHEX, SLC22A15, AP152, RPL13, PDIA3, DENND4A, PPP2R5A, EMP3, ITPKB, ARPC2, RFX7, ARPC3, HNRNPF, KLF9, RSL24D1, ABCG1, PRR13, LIMS1
	CEBPD ENCODE	1.964e-08	4.862e-07	4.37	77.49	SMIM14, JUN, BTG2, GADD45B, H3F3B, RPL10, H2AFZ, CFLAR, OAZ1, ACTB, EIF1, TUBA1C, HHEX, PKM, UBB, HNRNPF, RSRP1, RPL13, E2F2, HMGN2, OGT, RSL4D1, HIST1H2BC, LIMS1
	RUNX1 CHEA	5.41e-08	1.071e-06	3.36	56.26	BTG2, CITED2, DOCK8, ARHGAP18, SLC3A2, ADD3, RAP1B, SPN, STK10, LGALS3, TUBA1C, CHCHD2, CCND3, PIM1, E2F2, SH3BGRL3, TBL1X, CTSD, FNIP2, OSBPL8, CCDC12, SEMA4D, PPP2R5A, EMP3, CFLAR, ARL4C, KAT2B, DOK2, ARPC3, NEURL3, DMWD, SNTB2
	ZNF384 ENCODE	3.287e-07	4.648e-06	3.96	59.13	TRAM1, GADD45B, RPL10, ARHGAP18, SLC2A3, KIF23, CFLAR, ACTB, ZFP36L1, EIF1, RAP1B, ITPKB, TUBA1C, KAT2B, RYBP, CAPNS1, RILPL2, ARPC3, E2F2, LUC7L2, PRR13, SNTB2
Stem/neutrophil down in fusion	Hematopoietic stem cells in Liver	6.729e-05	0.002624	44.27	425.29	MS4A3, PRTN3, MPO
	Granulocyte-monocyte progenitor:Umbilical Cord Blood	2.73e-07	4.805e-05	26.75	404.24	MS4A3, ANXA1, CTSG, PRTN3, CST7, MPO
	MYC 19079543 ChIP-ChIP MESCs Mouse	2.689e-05	0.01433	4.76	50.06	RPL41, HK2, RPS28, RPS27, RPS29, RPL37A, RPL36, RPL35, HIST1H4H, RPL38, RPL37, RPL39, RPS21
Stem/neutrophil up in fusion	Myeloid cells in Stomach	0.001238	0.04086	15.57	104.22	FCER1G, RILPL2, NFAM1
	Neutrophils	1.394e-06	8.505e-05	19.99	269.54	DOK2, FCER1G, DOCK8, NFAM1, MMP8, CAMP
	Dendritic Cells	6.88e-06	0.0001612	14.98	178.1	LGALS3, NAPSA, DOK2, FCER1G, NFAM1, LSP1
	Macrophages	7.929e-06	0.0001612	14.6	171.49	LGALS3, DOK2, FCER1G, NFAM1, LSP1, SAMSN1
	FOXM1 ENCODE	7.286e-05	0.005314	20.3	193.43	UBE2C, UBE2S, H2AFX, CENPA
	SPI1 CHEA	0.0001398	0.005314	4.89	43.36	HHEX, SLC22A15, CITED2, UBE2S, DOCK8, ARPC1B, SLC3A2, LSP1, SAMSN1, LIMS1
	ZNF384 CH12.LX mm9	0.0005204	0.1588	3.46	26.14	NAPSA, MGST2, SLC2A3, LSP1, SAMSN1, CENPA, PRDX6, UGDH, DOK2, CES1D, RILPL2, SPP1, MPPE1
	PAX5 GM12892 hg19	0.0005225	0.1588	6.64	50.21	UGDH, UBE25, CITED2, DOCK8, LSP1, APRT
Stem/proB down in fusion	Common Lymphoid Progenitor (Clp) (id:126)	1.014e-11	1.561e-09	19.83	502.05	IGHM, CD52, SELPLG, GMFG, ARHGDIB, RAC2, RHOG, LAPTM5, IRF8, CORO1A, PSMB8, LIMD2
	Multipotent Progenitor Cell (Mpp) (id:429)	1.29e-10	9.934e-09	18.65	424.72	IGHM, CD52, TYROBP, SELL, IGKC, GMFG, LAPTM5, F13A1, IRF8, CTSG, MPO
	granulo mono progenitor	2.955e-05	0.002039	8.75	91.25	ATP8B4, MS4A3, H2AFY, VPS13C, PRTN3, CTSG, MPO
	MYC 19079543 ChIP-ChIP MESCs Mouse	1.117e-05	0.001275	2.88	32.89	ANAPC13, CTSZ, ZFP36l2, ATP5L, ANAPC11, ATP5E, RPL36, RPL35, RPLP2, RPL38, RPL37, RPL39, ACTR3, RPL41, XBP1, COX6C, RPS28, RPS27, RPS29, NPC2, RPL37A, SNRPG, NMT1, HIST1H4H, P4HB, RPS21
Stem/proB up in fusion	Erythroblasts in Pancreas	4.596e-13	2.022e-11	12.87	365.64	HEMGN, NFE2, GLRX5, ICAM4, ANK1, GATA1, TSPAN32, EPOR, RHD, KLF1, ALAD, PRDX2, GCLC, GFI1B, TSPO2, BLVRB, ERMAP
	ZNF384 MEL cell line mm9	1.505e-05	0.0002898	2.18	24.19	OTUD4, HEMG+A1:G55M, USP15, RPL10, TIMM13+A36:G55, MRPL32, NUDT4, SNX3, 2610507B11RIK, CAPNS1, TSPAN8, SPR, UBN2, SUMO2, APOE, STX2, NADK, TNPO3, BCAS2, CDK17, CAR1, SSB, H2AFZ, IFRD2, CDC6, ACYP1, GAPVD1, EPOR, MSL1, KLF1, PSMA3, GCLC, SFPQ, TSPO2, HNRNPF, SRSF3, CDK2AP1, SFXN1, ESYT2, PHIP, EEF1E1, LUC7L2, PRR13, PF4

## Sheet: ST8
Supplemental Table 8. Summary of CD34 transplantation experiments.
Mouse ID	Experiment	Cord blood	Insert	Viral prep	Transduction efficiency %	# of cells transplanted	Transplant method	Recepient mouse	Latency	Flow	Bone Marrow hCD45%	Spleen hCD45%	Bone Marrow hCD45+ GFP%	Spleen hCD45+ GFP%	CD34	CD38	CD34/38	CD19	CD33	CD19/33	CD10	Diagnosis	Tansplantable	Comments	RNA-seq	WES
4632	KD032	CB012919-2Donor	CL20-MIG EV	2019-11-22	63	28000	unsorted, intrafemoral	NSG-SGM3	End Study at 206	Not enough cells for analysis	0	6	0	6								No abnormalities	n/a		Yes	No
4634	KD032	CB012919-2Donor	CL20-MIG EV	2019-11-22	63	28000	unsorted, intrafemoral	NSG-SGM3	End Study at 206														n/a		No	No
4636	KD032	CB012919-2Donor	CL20-MIG EV	2019-11-22	63	28000	unsorted, intrafemoral	NSG-SGM3	End Study at 206														n/a		No	No
4638	KD032	CB012919-2Donor	CL20-MIG EV	2019-11-22	63	28000	unsorted, intrafemoral	NSG-SGM3	End Study at 206														n/a		No	No
4640	KD032	CB012919-2Donor	CL20-MIG EV	2019-11-22	63	28000	unsorted, intrafemoral	NSG-SGM3	End Study at 206		9	11	9	11	13	69	13	33	50	5	40		n/a		No	No
4602	KD032	CB012919-2Donor	CL20-MIG ZNF384 -e8 CHA	2019-11-22	42	30000	unsorted, intrafemoral	NSG-SGM3	152		10	76	4	35	1	30	1	18	8	2	17		n/a		No	No
4606	KD032	CB012919-2Donor	CL20-MIG ZNF384 -e8 CHA	2019-11-22	42	30000	unsorted, intrafemoral	NSG-SGM3	End Study at 206	Not enough cells for analysis	1	6	1	6									n/a		No	No
4610	KD032	CB012919-2Donor	CL20-MIG ZNF384 -e8 CHA	2019-11-22	42	19000	unsorted, intrafemoral	NSG-SGM3	End Study at 206														n/a		No	No
4614	KD032	CB012919-2Donor	CL20-MIG ZNF384 -e8 CHA	2019-11-22	42	19000	unsorted, intrafemoral	NSG-SGM3	End Study at 206		17	22	11	10	2	29	2	17	9	3	10	No abnormalities	n/a		No	No
4612	KD032	CB012919-2Donor	CL20-MIG ZNF384 -e8 CHA	2019-11-22	42	19000	unsorted, intrafemoral	NSG-SGM3	End Study at 206														n/a		No	No
4622	KD032	CB012919-2Donor	CL20-MIG TCF3::ZNF384384 -e8 e13-e5 CHA	2019-11-22	34	26000	unsorted, intrafemoral	NSG-SGM3	74		76	52	83	59	25	76	18	36	42	14	44		No	sorted, GFP+CD34+ or GFP+CD34-	Yes	No
4624	KD032	CB012919-2Donor	CL20-MIG TCF3::ZNF384384 -e8 e13-e5 CHA	2019-11-22	34	26000	unsorted, intrafemoral	NSG-SGM3	63		80	80	61	43	4	53	3	20	69	7	28		n/a		Yes	No
4626	KD032	CB012919-2Donor	CL20-MIG TCF3::ZNF384384 -e8 e13-e5 CHA	2019-11-22	34	26000	unsorted, intrafemoral	NSG-SGM3	109		85	10	81	7	8	40	7	45	57	30	52		n/a		Yes	No
4628	KD032	CB012919-2Donor	CL20-MIG TCF3::ZNF384384 -e8 e13-e5 CHA	2019-11-22	34	26000	unsorted, intrafemoral	NSG-SGM3	63		65	90	67	52	10	70	7	21	57	8	26	B/Myeloid leukemia	No	unsorted, intrafemoral	Yes	No
4630	KD032	CB012919-2Donor	CL20-MIG TCF3::ZNF384384 -e8 e13-e5 CHA	2019-11-22	34	26000	unsorted, intrafemoral	NSG-SGM3	109		64	34	60	26	40	44	29	34	35	11	83	B/Myeloid leukemia	n/a		Yes	No
1	KD032	CB012919-2Donor	CL20-MIG EV	2019-11-22	63	29000	unsorted, intrafemoral	NSG	End Study at 220		4	20	90	95	22	21	18	97	99	96	70		n/a		No	No
2	KD032	CB012919-2Donor	CL20-MIG EV	2019-11-22	63	29000	unsorted, intrafemoral	NSG	End Study at 220														n/a		No	No
3	KD032	CB012919-2Donor	CL20-MIG EV	2019-11-22	63	29000	unsorted, intrafemoral	NSG	End Study at 220		5	28	90	97	36	42	34	94	100	94	54		n/a		No	No
4	KD032	CB012919-2Donor	CL20-MIG EV	2019-11-22	63	29000	unsorted, intrafemoral	NSG	End Study at 220														n/a		No	No
5	KD032	CB012919-2Donor	CL20-MIG EV	2019-11-22	63	29000	unsorted, intrafemoral	NSG	End Study at 220														n/a		No	No
11	KD032	CB012919-2Donor	CL20-MIG ZNF384 -e8 CHA	2019-11-22	42	29000	unsorted, intrafemoral	NSG	End Study at 220		74	72	19	22	3	67	3	13	12	7	23		n/a		No	No
12	KD032	CB012919-2Donor	CL20-MIG ZNF384 -e8 CHA	2019-11-22	42	29000	unsorted, intrafemoral	NSG	End Study at 220		9	13	89	97	28	32	26	97	99	97	71		n/a		No	No
13	KD032	CB012919-2Donor	CL20-MIG ZNF384 -e8 CHA	2019-11-22	42	29000	unsorted, intrafemoral	NSG	End Study at 220														n/a		No	No
14	KD032	CB012919-2Donor	CL20-MIG ZNF384 -e8 CHA	2019-11-22	42	29000	unsorted, intrafemoral	NSG	End Study at 220														n/a		No	No
15	KD032	CB012919-2Donor	CL20-MIG ZNF384 -e8 CHA	2019-11-22	42	29000	unsorted, intrafemoral	NSG	End Study at 220														n/a		No	No
6	KD032	CB012919-2Donor	CL20-MIG TCF3::ZNF384384 -e8 e13-e5 CHA	2019-11-22	34	30000	unsorted, intrafemoral	NSG	End Study at 220														n/a		No	No
7	KD032	CB012919-2Donor	CL20-MIG TCF3::ZNF384384 -e8 e13-e5 CHA	2019-11-22	34	30000	unsorted, intrafemoral	NSG	End Study at 220		4	17	66	96	63	64	57	99	100	99	42		n/a		No	No
8	KD032	CB012919-2Donor	CL20-MIG TCF3::ZNF384384 -e8 e13-e5 CHA	2019-11-22	34	30000	unsorted, intrafemoral	NSG	End Study at 220		59	82	8	4	30	52	26	86	74	64	86		n/a		No	No
9	KD032	CB012919-2Donor	CL20-MIG TCF3::ZNF384384 -e8 e13-e5 CHA	2019-11-22	34	30000	unsorted, intrafemoral	NSG	End Study at 220														n/a		No	No
10	KD032	CB012919-2Donor	CL20-MIG TCF3::ZNF384384 -e8 e13-e5 CHA	2019-11-22	34	30000	unsorted, intrafemoral	NSG	End Study at 220														n/a		No	No
3522	KD020	CB081418-2Donor	CL20-MIG EV	2018-08-03	46	5000	unsorted, intrafemoral	NSG-SGM3	End Study at 224				n/a	n/a									n/a		No	No
3516	KD020	CB081418-2Donor	CL20-MIG EV	2018-08-03	46	5000	unsorted, intrafemoral	NSG-SGM3	End Study at 224				n/a	n/a									n/a		No	No
3524	KD020	CB081418-2Donor	CL20-MIG ZNF384	2018-08-03	18	5000	unsorted, intrafemoral	NSG-SGM3	End Study at 224				n/a	n/a									n/a		No	No
3518	KD020	CB081418-2Donor	CL20-MIG ZNF384	2018-08-03	18	5000	unsorted, intrafemoral	NSG-SGM3	End Study at 224	Not enough cells for analysis	0	n/a	75	n/a									n/a		No	No
3474	KD020	CB081418-2Donor	CL20-MIG EP300::ZNF384384 -e8 NHA	2018-08-03	10	10000	unsorted, intrafemoral	NSG-SGM3	End Study at 224	Not enough cells for analysis	1	1	14	9	41	41	30	49	92	46	24		n/a		No	No
3476	KD020	CB081418-2Donor	CL20-MIG EP300::ZNF384384 -e8 NHA	2018-08-03	10	10000	unsorted, intrafemoral	NSG-SGM3	End Study at 224	Not enough cells for analysis	2	n/a	87	n/a	54	47	33	85	100	85	53		n/a		No	No
3478	KD020	CB081418-2Donor	CL20-MIG EP300::ZNF384384 -e8 NHA	2018-08-03	10	10000	unsorted, intrafemoral	NSG-SGM3	End Study at 224				n/a	n/a									n/a		No	No
3520	KD020	CB081418-2Donor	CL20-MIG TAF15::ZNF384384 -e8 NHA	2018-08-03	14	10000	unsorted, intrafemoral	NSG-SGM3	End Study at 224		16	7	4	36	83	90	80	99	99	99	1		n/a		No	No
3480	KD020	CB081418-2Donor	CL20-MIG TAF15::ZNF384384 -e8 NHA	2018-08-03	14	10000	unsorted, intrafemoral	NSG-SGM3	End Study at 224	Not enough cells for analysis	0	n/a	64	n/a									n/a		No	No
3482	KD020	CB081418-2Donor	CL20-MIG TAF15::ZNF384384 -e8 NHA	2018-08-03	14	10000	unsorted, intrafemoral	NSG-SGM3	End Study at 224				n/a	n/a									n/a		No	No
3484	KD020	CB081418-2Donor	CL20-MIG TAF15::ZNF384384 -e8 NHA	2018-08-03	14	10000	unsorted, intrafemoral	NSG-SGM3	End Study at 224	Not enough cells for analysis	0	n/a	66	n/a									n/a		No	No
358	KD021	CB081518-2Donor	CL20-MIG EV	2018-08-03	46	50000	unsorted, intrafemoral	NSG	End Study at 224		24	n/a	16	n/a	39	98	38	61	25	10	61	No leukemia	n/a		No	No
359	KD021	CB081518-2Donor	CL20-MIG EV	2018-08-03	46	50000	unsorted, intrafemoral	NSG	End Study at 224				n/a	n/a									n/a		No	No
352	KD021	CB081518-2Donor	CL20-MIG ZNF384	2018-08-03	18	50000	unsorted, intrafemoral	NSG	End Study at 224		39	n/a	45	n/a	48	100	48	72	15	6	88	No leukemia	n/a		No	No
353	KD021	CB081518-2Donor	CL20-MIG ZNF384	2018-08-03	18	50000	unsorted, intrafemoral	NSG	End Study at 224				n/a	n/a									n/a		No	No
354	KD021	CB081518-2Donor	CL20-MIG ZNF384	2018-08-03	18	50000	unsorted, intrafemoral	NSG	End Study at 224				n/a	n/a									n/a		No	No
321	KD021	CB081518-2Donor	CL20-MIG EP300::ZNF384384 -e8 e6-e3 NHA	2018-08-03	10	50000	unsorted, intrafemoral	NSG	End Study at 224				n/a	n/a									n/a		No	No
322	KD021	CB081518-2Donor	CL20-MIG EP300::ZNF384384 -e8 e6-e3 NHA	2018-08-03	10	50000	unsorted, intrafemoral	NSG	End Study at 224		34	23	5	1	53	90	49	32	87	27	24	No leukemia	n/a		No	No
323	KD021	CB081518-2Donor	CL20-MIG EP300::ZNF384384 -e8 e6-e3 NHA	2018-08-03	10	50000	unsorted, intrafemoral	NSG	End Study at 224				n/a	n/a									n/a		No	No
324	KD021	CB081518-2Donor	CL20-MIG EP300::ZNF384384 -e8 e6-e3 NHA	2018-08-03	10	50000	unsorted, intrafemoral	NSG	End Study at 224				n/a	n/a									n/a		No	No
355	KD021	CB081518-2Donor	CL20-MIG EP300::ZNF384384 -e8 e6-e3 NHA	2018-08-03	10	50000	unsorted, intrafemoral	NSG	222		84	77	21	15	45	92	42	37	26	10	33		No	Tried with or without NRAS G12D	No	No
356	KD021	CB081518-2Donor	CL20-MIG EP300::ZNF384384 -e8 e6-e3 NHA	2018-08-03	10	50000	unsorted, intrafemoral	NSG	End Study at 224				n/a	n/a									n/a		No	No
357	KD021	CB081518-2Donor	CL20-MIG EP300::ZNF384384 -e8 e6-e3 NHA	2018-08-03	10	50000	unsorted, intrafemoral	NSG	End Study at 224		42	56	1	1	71	97	70	62	83	54	50		n/a		No	No
326	KD021	CB081518-2Donor	CL20-MIG TCF3::ZNF384384 -e8 e13-e5 CHA	2018-08-03	15	25000	unsorted, intrafemoral	NSG	End Study at 224		59	67	63	45	39	59	23	13	19	5	1	No leukemia	No	Tried with or without NRAS G12D	No	No
327	KD021	CB081518-2Donor	CL20-MIG TCF3::ZNF384384 -e8 e13-e5 CHA	2018-08-03	15	25000	unsorted, intrafemoral	NSG	198		65	72	1	4	61	27	16	89	55	61	9		n/a		No	No
328	KD021	CB081518-2Donor	CL20-MIG TCF3::ZNF384384 -e8 e13-e5 CHA	2018-08-03	15	25000	unsorted, intrafemoral	NSG	198		43	51	7	8	76	67	56	89	86	78	55		n/a		No	No
329	KD021	CB081518-2Donor	CL20-MIG TCF3::ZNF384384 -e8 e13-e5 CHA	2018-08-03	15	25000	unsorted, intrafemoral	NSG	End Study at 224		50	69	1	1	58	97	57	38	79	32	27		n/a		No	No
330	KD021	CB081518-2Donor	CL20-MIG TCF3::ZNF384384 -e8 e13-e5 CHA	2018-08-03	15	25000	unsorted, intrafemoral	NSG	198		59	70	2	3	43	56	34	93	68	66	13		n/a		No	No
351	KD021	CB081518-2Donor	CL20-MIG TCF3::ZNF384384 -e8 e13-e5 CHA	2018-08-03	15	25000	unsorted, intrafemoral	NSG	156		79	95	4	5	18	98	18	22	76	15	76		n/a		No	No

## Sheet: ST9
Supplemental Table 9. Gene lists GREAT analysis.
Regions with increased binding of fusions vs WT	Regions with increased binding of TCF3-ZNF with exon8 vs without exon8
0610040J01Rik	1110004E09Rik
1110032F04Rik	1110051M20Rik
1110051M20Rik	1600002K03Rik
1110059E24Rik	1600014C23Rik
1190002N15Rik	1700003H04Rik
1700016C15Rik	1700008O03Rik
1700016H13Rik	1700013F07Rik
1700021F07Rik	1700016C15Rik
1700034J05Rik	1700021F07Rik
1700040L02Rik	1700029H14Rik
1700129C05Rik	1810011O10Rik
2810474O19Rik	1810032O08Rik
3110018I06Rik	2010109A12Rik
4921524L21Rik	2610002M06Rik
4930402H24Rik	2700062C07Rik
4930404H24Rik	2810428I15Rik
4930447C04Rik	2900026A02Rik
4930474N05Rik	3100002H09Rik
4930550C14Rik	3110018I06Rik
4930583I09Rik	4930404H24Rik
4931414P19Rik	4930524B15Rik
4931440F15Rik	4930539E08Rik
4932438H23Rik	4930563D23Rik
4933402J07Rik	4930583I09Rik
5730508B09Rik	4931428F04Rik
5830411N06Rik	4933402J07Rik
6030458C11Rik	4933402P03Rik
6430531B16Rik	4933405L10Rik
6430573F11Rik	4933409G03Rik
9130230L23Rik	4933424G06Rik
9130409I23Rik	4933428G20Rik
9230109A22Rik	5031439G07Rik
A830010M20Rik	5330417C22Rik
A930033H14Rik	5730409E04Rik
AF529169	5730508B09Rik
AU040320	6030419C18Rik
Aaed1	7420461P10Rik
Aagab	7530416G11Rik
Aamdc	9030624J02Rik
Aars	9530002B09Rik
Aatk	9530053A07Rik
Abca16	9530068E07Rik
Abca17	A3galt2
Abca4	A430105I19Rik
Abcc4	A830080D01Rik
Abr	A930033H14Rik
Abtb2	AU018091
Acaa2	Aaas
Acer1	Abat
Acot7	Abcc12
Acsf3	Abcc3
Acss2	Abcd3
Actb	Abhd17a
Actg1	Ablim1
Actr10	Abo
Actr3	Abr
Acyp2	Acaa2
Adam12	Acad11
Adam2	Acd
Adam6a	Acox1
Adamts6	Acp7
Adap1	Actb
Adcy5	Actg1
Adcy9	Actn1
Adgrl3	Actn4
Adm	Actr1a
Ado	Actr3
Adrb1	Acvr1
Adsl	Ada
Aebp2	Adam11
Afap1l1	Adam2
Agbl4	Adam30
Agpat4	Adamts1
Ahnak	Adamts16
Ajuba	Adamts20
Akap1	Adamts7
Akap12	Adamtsl4
Akap2	Adck1
Akr1d1	Adcy10
Akt3	Adcy9
Aldoart2	Add3
Alg14	Adnp
Alk	Ado
Alppl2	Adprhl2
Alyref2	Adra1a
Amd2	Adra2c
Amdhd2	Adrb1
Ammecr1	Afap1l2
Ampd3	Ager
Amph	Agpat3
Amz1	Ahnak
Ankrd10	Ahnak2
Ankrd12	Ak1
Ankrd44	Ak2
Ankrd55	Ak9
Ankrd6	Akap1
Ankrd63	Akt3
Ankrd9	Alg8
Anks1b	Alox5ap
Anp32a	Alpk3
Anpep	Amigo2
Antxr2	Anapc15-ps
Anxa2	Ankar
Aox2	Ankrd27
Ap1ar	Ankrd40
Ap1s3	Ankrd44
Ap3b1	Ankrd55
Ap3s2	Ankrd6
Ap4s1	Ankrd9
Apaf1	Antxr1
Apba2	Anxa6
Apbb1ip	Ap1ar
Aqp4	Apobec3
Arfgap2	Apof
Arfgap3	Apol7a
Arhgap10	Apon
Arhgap18	Aqp12
Arhgap26	Arap2
Arhgap29	Arap3
Arhgap35	Arf4
Arhgap42	Arfgap2
Arhgef12	Arfgef2
Arhgef26	Arglu1
Arhgef3	Arhgap10
Arid1a	Arhgap11a
Arid1b	Arhgap39
Arid3a	Arhgef1
Arid5b	Arhgef10l
Arl15	Arhgef12
Arl3	Arhgef19
Arl5a	Arhgef25
Arl6ip6	Arl15
Arntl	Arl2
Arsb	Arl3
Asap1	Arl4d
Asb1	Arntl
Ascc1	Asb8
Asgr1	Ass1
Asxl1	Asxl2
Asxl3	Atad2
Atad2b	Atf4
Atf6	Atf6
Atg14	Atg16l2
Atg16l2	Atg4d
Atg4a-ps	Atg7
Atg7	Atp10b
Atl2	Atp13a1
Atoh1	Atp2a1
Atp1b1	Atp2a2
Atp2a3	Atp2a3
Atp5g3	Atp5g3
Atp6v0d1	Atp5sl
Atp6v1g3	Atp6v0d1
Atp8b1	Atrnl1
Atp9a	Atxn1
Atr	Atxn2
Atrnl1	Atxn2l
Atxn1	Auh
Atxn2	Avil
Auh	Avpr1b
Auts2	Axin1
Aven	Axin2
Avpi1	Azin2
B3gat2	B130006D01Rik
B430305J03Rik	B230217C12Rik
B4galnt1	B3galt1
B4galt1	B4galnt1
B4galt4	B4galnt3
Bach1	B4galt5
Bahcc1	BC003965
Baiap2	BC106179
Basp1	Bach1
Bcas3	Bach2
Bcat2	Bad
Bckdha	Bahcc1
Bcl11a	Banf2
Bcl11b	Banp
Bcl2a1c	Batf3
Bcl2l1	Bbs7
Bcl2l11	Bcam
Bcl7a	Bcl11b
Bean1	Bcl2l11
Bend3	Becn1
Bend5	Bhlha9
Bend7	Bicdl2
Bhlha9	Bid
Bhlhe41	Birc6
Bicd1	Bmpr2
Bin3	Bola2
Birc6	Bptf
Bmpr1a	Brd4
Bmpr1b	Brinp1
Bmpr2	Brpf1
Bnc2	Brpf3
Brdt	Bst2
Brf2	Btbd10
Bri3	Btbd19
Brms1l	Btbd2
Btbd10	Btbd9
Btg1	Btrc
Btg2	Bub3
Btg3	Bves
Btrc	Bysl
Bzw1	C1ql4
C1ql2	C2cd4b
Cacna1a	Cabp7
Cacnb4	Cacna1a
Cacng5	Cacna1e
Cadm2	Cacna1h
Calb1	Cacnb3
Calcr	Cadps2
Calcrl	Calb2
Cand1	Calcr
Cap2	Camkk2
Capn11	Camkmt
Capn12	Capn11
Car12	Capn5
Car8	Capn8
Cavin1	Capzb
Cbfa2t3	Car8
Cbln4	Card14
Cbr1	Cars2
Cbr3	Catsperg1
Cbr4	Cblc
Ccar2	Cbln1
Ccbe1	Cbx2
Ccdc141	Cbx7
Ccdc150	Cbx8
Ccdc171	Cby3
Ccdc178	Ccdc102a
Ccdc182	Ccdc130
Ccdc50	Ccdc154
Ccdc59	Ccdc184
Ccdc68	Ccdc43
Ccdc83	Ccdc59
Ccdc89	Ccdc63
Ccnd2	Ccdc65
Ccne2	Ccdc68
Ccnf	Ccdc84
Ccr4	Ccdc85c
Ccr7	Ccer2
Ccser2	Ccl1
Cct2	Ccnd3
Cd109	Ccni
Cd180	Ccnk
Cd247	Ccr4
Cd83	Ccr6
Cdc14b	Ccr7
Cdca2	Ccser2
Cdh13	Cct2
Cdh20	Cd109
Cdh3	Cd164l2
Cdh5	Cd22
Cdk1	Cd27
Cdk12	Cd276
Cdk14	Cd300lg
Cdk18	Cd4
Cdk19	Cd83
Cdk5r1	Cdc42ep1
Cdkl3	Cdc6
Cdkn2a	Cdca2
Cdon	Cdca4
Cdyl	Cdcp2
Cdyl2	Cdh13
Celf2	Cdh20
Cenpc1	Cdh3
Cenpm	Cdk1
Cep44	Cdk15
Cep68	Cdk18
Cep95	Cdk2ap1
Cfap157	Cdk9
Cfap161	Cdkn1a
Cfl2	Cebpb
Cftr	Cecr2
Chaf1b	Celsr2
Chd2	Cep112
Chd6	Cep164
Chit1	Cep97
Chka	Cerk
Chmp6	Cers5
Chn1	Cfap58
Chp2	Cfd
Chrm1	Cftr
Chrna1	Chaf1b
Chst15	Chd1
Cit	Chd2
Cited2	Chd4
Clcc1	Chd5
Cldn14	Chga
Cldn23	Chmp1a
Cldn5	Chst12
Clic5	Cilp2
Clint1	Cinp
Clybl	Cipc
Cmc2	Cirbp
Cmip	Cisd1
Cmtm7	Cit
Cnep1r1	Cited1
Cnih3	Ckm
Cnn3	Cks2
Cnot6	Cldn14
Cnot7	Cldn5
Cnot9	Clec16a
Cnpy2	Clec2l
Cnst	Clic5
Cntn5	Clk3
Cntnap5b	Clmn
Coch	Clmp
Cog1	Clspn
Col1a1	Clstn1
Col25a1	Cmip
Col26a1	Cmtm6
Commd5	Cmtm7
Commd7	Cnbd2
Cops7b	Cndp2
Coro1a	Cnep1r1
Coro2b	Cngb1
Coro7	Cnih3
Cox11	Cnksr3
Cox4i2	Cnn2
Cox6b1	Cnp
Cox7a2l	Cntnap4
Cp	Cntnap5b
Cpb2	Coa3
Cpeb2	Cog1
Cplx2	Col1a1
Cplx4	Col23a1
Cpsf2	Col25a1
Cpxm2	Col26a1
Cradd	Col27a1
Creb5	Col4a1
Crebbp	Col8a2
Crh	Commd5
Cript	Commd7
Crkl	Coq10b
Crls1	Cox11
Crnkl1	Cox20
Cry2	Cox6a1
Cs	Cox7a1
Csnk1g3	Cox7a2l
Csnka2ip	Cpa2
Csrnp2	Cpa4
Csrp2	Cpeb4
Cst7	Cplx2
Cth	Cpne5
Ctif	Cpt1a
Ctnna3	Crb2
Ctnnb1	Crebbp
Ctnnd1	Crim1
Ctsc	Crocc
Cttnbp2	Crtc3
Cul3	Cryaa
Cux1	Crybb3
Cwc27	Crygs
Cxadr	Csad
Cyb5b	Cse1l
Cyp2d26	Csf3r
Cyp2t4	Csnk1a1
Cyp4f18	Csnk1g2
Cystm1	Csnk1g3
D1Ertd622e	Csnka2ip
D5Ertd579e	Cspg5
D630036H23Rik	Csrnp2
D630039A03Rik	Csrnp3
Dars2	Cstad
Dazap1	Ctbp2
Dbx1	Ctcfl
Dcaf12	Ctdsp2
Dcaf5	Cth
Dcaf6	Ctif
Dclk2	Ctnnb1
Dcn	Ctnnd1
Ddc	Ctse
Ddr2	Ctsh
Ddx11	Ctsz
Ddx50	Cttn
Defb48	Cttnbp2
Dennd5b	Cubn
Depdc1b	Cul9
Des	Cxcr4
Dgat1	Cyb5b
Dgka	Cyp26c1
Dhdds	Cyp2w1
Dhx9	Cyp39a1
Diaph3	Cyth1
Dio2	D430042O09Rik
Dis3l2	Daglb
Disc1	Dazap1
Dkk2	Dbh
Dlc1	Dbn1
Dleu7	Dbx1
Dlg4	Dcps
Dlgap4	Ddc
Dlk1	Ddx23
Dlx1	Dedd2
Dlx2	Dennd1a
Dmrt1	Dennd2a
Dmxl1	Dennd3
Dnajc1	Depdc5
Dnajc22	Dgat2
Dnajc28	Dgkg
Dnmt3b	Dhdds
Dnmt3c	Dhodh
Dock10	Dhx58
Dock3	Dhx8
Dok5	Dicer1
Dpf3	Dio3
Dpt	Dip2b
Dpy19l1	Dirc2
Dpy19l4	Dkkl1
Drd1	Dleu7
Drg1	Dlgap4
Dstn	Dlx4
Dthd1	Dmtn
Dtl	Dmwd
Dtnbp1	Dmxl1
Dtwd2	Dnaaf1
Dusp14	Dnah17
Dusp27	Dnah2
Dusp4	Dnajb8
Dusp6	Dnajc19
Dym	Dnajc22
Dync1i2	Dnajc28
Dynlrb2	Dnm2
Dynlt1b	Dnmt3b
Dynlt1c	Dock4
Dyrk2	Dock5
E130114P18Rik	Dok2
E130311K13Rik	Dok4
ENSMUSG00000111410	Dpep1
Ebf1	Dpf3
Ebf2	Dpp9
Ect2l	Dpysl2
Edaradd	Dpysl3
Edem3	Dpysl4
Efhb	Dpysl5
Efna5	Dram1
Egr2	Drd1
Eif2s3x	Drg1
Eif4enif1	Dscaml1
Eif4g3	Dtd2
Eif5b	Dthd1
Elavl3	Dtnb
Ell2	Dtx1
Elovl4	Duox1
Emb	Duoxa1
Emcn	Dusp14
Eml1	Dusp2
Eml6	Dusp22
Emx1	Dusp5
Emx2	Dydc2
Eno1b	Dync1h1
Enpp6	Dynll2
Ep300	Dyrk1a
Epb41l4b	E2f2
Epc1	Ebf2
Epg5	Ecm1
Epha3	Edaradd
Epo	Edil3
Eps15	Edn3
Eps15l1	Eea1
Eral1	Efna3
Erbin	Efna4
Erc1	Efna5
Ern1	Eif3c
Ern2	Eif3k
Esr1	Eif4enif1
Esrp1	Eif4g3
Etd	Eif5
Etnk1	Eif5a
Ets1	Elfn1
Eva1c	Ell
Evl	Elmod1
Exd2	Eme1
Exoc4	Emilin2
Exoc6	Eng
Exosc5	Enpp2
Exosc6	Eomes
Ext1	Ep300
F2rl1	Epb41l3
F5	Epb41l4a
Fabp5	Epg5
Fads6	Epha3
Fam107a	Ephb4
Fam117b	Ephx3
Fam124b	Epo
Fam129a	Erbin
Fam135b	Erg
Fam171b	Erich4
Fam173b	Etnk2
Fam174b	Etnppl
Fam178b	Ets2
Fam181b	Etv4
Fam184a	Eva1c
Fam189a2	Evpl
Fam193b	Exoc6
Fam19a2	Extl3
Fam204a	Eya2
Fam208a	F11r
Fam210a	F3
Fam213b	Fahd2a
Fam3c	Fam104a
Fam43a	Fam107a
Fam46a	Fam117b
Fam49a	Fam120a
Fam49b	Fam155a
Fam60a	Fam160b1
Fam71d	Fam160b2
Fam83g	Fam162b
Fam8a1	Fam174b
Fam92a	Fam178b
Fancc	Fam213a
Fank1	Fam219b
Farp1	Fam234a
Fasl	Fam234b
Fbp1	Fam46b
Fbxl3	Fam46d
Fbxl4	Fam49a
Fbxo11	Fam60a
Fbxo21	Fam69c
Fbxo4	Fam71a
Fcho2	Fam71b
Fchsd2	Fam71d
Fgd2	Fam76a
Fgf10	Fam83f
Fgf12	Fam83g
Fgf5	Fam92b
Fgfr2	Fancc
Fggy	Fance
Fhit	Fbl
Fignl1	Fblim1
Fkbp5	Fbp1
Flot2	Fbxl18
Flt3	Fbxw8
Fmnl2	Fbxw9
Fndc3b	Fcgbp
Fntb	Fcgrt
Foxa2	Fchsd2
Foxc1	Fem1a
Foxf2	Fen1
Foxn2	Fez2
Foxn3	Fgf12
Foxp1	Fig4
Frk	Fignl1
Frmd6	Fkbp5
Frmpd2	Flrt1
Frs2	Flt1
Fryl	Fmnl1
Fscn1	Fmnl2
Fshr	Fmnl3
Fsip2	Fnbp1
Fstl4	Fnip2
Fstl5	Fntb
Ftmt	Foxa1
Fxyd3	Foxc1
Fxyd5	Foxd1
Fxyd7	Foxd3
Fyb2	Foxf2
Fzd1	Foxo1
Gabpb2	Foxp1
Gad2	Foxs1
Gadl1	Fpgs
Galr1	Frmd8
Gart	Frs2
Gatsl2	Fstl4
Gbgt1	Fut8
Gcom1	Fxyd3
Gdi2	Fyb2
Gemin6	Fzd10
Get4	Fzd7
Gfod2	Gad2
Gfpt2	Gadd45b
Gfra1	Gadd45g
Gfra2	Gadd45gip1
Ghr	Gal
Ghsr	Gal3st2c
Gigyf1	Galns
Gimd1	Galnt1
Gins2	Galnt9
Gja1	Garem1
Gk2	Gart
Gk5	Gas6
Glb1l	Gata2
Glcci1	Gatad2b
Gle1	Gatsl2
Glmn	Gatsl3
Gls	Gcat
Glt8d1	Gcom1
Glul	Gdnf
Gm10020	Gfra1
Gm10073	Gfy
Gm10097	Ghitm
Gm10118	Gigyf1
Gm10184	Gja1
Gm10295	Gjd2
Gm10309	Gjd3
Gm10642	Gk5
Gm10837	Glp1r
Gm10985	Gm10073
Gm1113	Gm10306
Gm11437	Gm10320
Gm11492	Gm1043
Gm12728	Gm10549
Gm13691	Gm10837
Gm16494	Gm11084
Gm21188	Gm11232
Gm21830	Gm11437
Gm21936	Gm11627
Gm21949	Gm11733
Gm281	Gm12689
Gm29106	Gm12830
Gm3443	Gm13040
Gm4775	Gm14569
Gm4950	Gm17087
Gm5218	Gm4775
Gm525	Gm4846
Gm5426	Gm4869
Gm5622	Gm4881
Gm597	Gm498
Gm7334	Gm5160
Gm765	Gm5218
Gm8300	Gm5431
Gm9376	Gm6657
Gm9817	Gm6793
Gm9881	Gm765
Gm9964	Gm815
Gmnn	Gm9195
Gmpr	Gm9961
Gmps	Gm9964
Gna11	Gm9972
Gna12	Gna13
Gna14	Gnb1
Gna15	Gng7
Gnaq	Gnmt
Gnb1	Gnrh1
Gns	Golga4
Golph3l	Golph3
Gon4l	Gphn
Got2	Gpr107
Gpbar1	Gpr132
Gpc5	Gpr146
Gphn	Gpr3
Gpm6b	Gpx3
Gpr15	Gpx4
Gpr153	Gramd1a
Gpr161	Gramd4
Gpr183	Grap
Gpr89	Grap2
Gprin3	Grb7
Gpsm2	Greb1
Gpx4	Grem1
Gramd3	Grhl3
Grap	Grhpr
Grasp	Gria1
Grb10	Grifin
Grb7	Grik1
Greb1	Grik3
Grik1	Grik4
Grik4	Grip2
Grk5	Grtp1
Grm5	Gsc
Grpr	Gse1
Grxcr1	Gsg1
Gse1	Gsg1l
Gsk3b	Gsto2
Gss	Gtf2a1
Gtf2e1	Gtf2i
Gtf2i	Gtpbp3
Gtf2ird1	Gucy1a3
Gtf3c3	Gulo
Gucd1	Gxylt1
Gulo	H1f0
Gxylt1	H1foo
Gypc	H2afy
H1foo	Haao
H2afb1	Habp2
H2afb2	Hadh
H2afb3	Hand1
H2al1a	Hao2
H60b	Hapln1
Haao	Hc
Hacd2	Hddc3
Hace1	Hdgfl3
Hat1	Hdhd5
Haus2	Heatr5a
Hcn4	Hectd2
Hdac9	Hexim2
Hddc2	Hhat
Hdgfl2	Hhex
Hecw2	Hhipl1
Hes1	Hic2
Hey2	Hif1a
Heyl	Hils1
Hgd	Hipk2
Hhex	Hlx
Hic2	Hmcn2
Hils1	Hmga2
Hmga2	Hmgn3
Hmgn2	Hnrnpa3
Hnrnpll	Hnrnph1
Hnrnpr	Hnrnpu
Hp1bp3	Hopx
Hpgd	Hoxb2
Hpn	Hoxb3
Hrh2	Hoxd10
Hs6st1	Hoxd13
Hsd17b12	Hp
Hsd17b14	Hp1bp3
Hsdl2	Hpdl
Hsf1	Hpn
Hsf2	Hr
Hsfy2	Hrh1
Hspa4	Hs3st3b1
Hspb1	Hsd17b12
Hspb11	Hsdl1
Htatip2	Hsf2
Htr7	Hsf5
Ibtk	Hsp90ab1
Ice2	Hspa1b
Ifitm1	Hspa8
Ifitm3	Hspd1
Ifitm6	Htr6
Ifna15	Hunk
Ifnar2	Ice1
Ifnb1	Icos
Ifng	Id2
Ifrd1	Id3
Igdcc3	Idh2
Igsf10	Ido2
Ikbkb	Ier5
Ikzf1	Ier5l
Ikzf3	Ifnlr1
Il10ra	Ift81
Il12a	Ihh
Il16	Ikzf3
Il17ra	Il10
Il22	Il15ra
Il6st	Il17b
Ing1	Il17rc
Inpp5a	Il2ra
Insm1	Il9
Ints4	Ildr2
Ints6	Immp2l
Ints8	Inafm2
Ip6k3	Inha
Ipmk	Inpp5a
Ipp	Inpp5e
Iqcg	Insl3
Iqcm	Insm2
Iqsec1	Ipcef1
Irak1bp1	Iqck
Irf2	Iqgap1
Irf2bp2	Irf2bp2
Irf2bpl	Irf2bpl
Itga6	Irf4
Itgal	Irf7
Itgav	Irgm1
Itih5	Irgq
Itln1	Isca1
Itpk1	Isyna1
Itpkb	Itga3
Itpr2	Itgb5
Izumo2	Itpk1
Jak2	Jade2
Jarid2	Jag2
Jmjd1c	Jak3
Jun	Jakmip1
Kank1	Jarid2
Kansl1	Jsrp1
Kansl2	Kcnab2
Kantr	Kcnb2
Kcnb2	Kcnc3
Kcnc1	Kcnc4
Kcng3	Kcng3
Kcnj2	Kcnh1
Kcnk12	Kcnh3
Kcnma1	Kcnip3
Kcnn4	Kcnj6
Kcnq5	Kcnk16
Kcnrg	Kcnk5
Kctd1	Kcnk6
Kctd16	Kcnk9
Kctd8	Kcnmb4
Kdm4b	Kcnq5
Kdm5a	Kcnrg
Kdm5c	Kctd21
Khdrbs2	Kctd3
Kif20b	Kctd4
Kif2a	Kctd5
Klc2	Kdelr1
Klf2	Kdf1
Klf3	Kdm4b
Klf4	Kdm6b
Klf9	Keap1
Klhdc4	Khdc1b
Klhl14	Khdc3
Klhl2	Kidins220
Klhl29	Kif1a
Klhl36	Kif23
Klra17	Kif26a
Klra5	Kif3b
Krr1	Kifc3
Krtap20-2	Kifc5b
Krtap21-1	Kirrel3
Ksr1	Klf16
Ktn1	Klf4
Kynu	Klhdc4
L3mbtl3	Klhdc7b
Lamc2	Klhl14
Lcp1	Kpna2
Ldhal6b	Krba1
Ldlrad1	Kri1
Ldlrad4	Lag3
Ldlrap1	Lamp1
Ldoc1l	Larp1
Lemd1	Larp4
Lgals7	Lats2
Lgals8	Lbx1
Lhfp	Lcn4
Lhfpl2	Ldlr
Lhx8	Ldlrap1
Lhx9	Ldoc1l
Lilr4b	Lef1
Lin28a	Lfng
Lipg	Lgals2
Litaf	Lgals8
Lman1	Lgals9
Lmcd1	Lhx3
Lmf1	Lhx5
Lmnb1	Lif
Lpar1	Lima1
Lpin2	Lin28a
Lpp	Lipg
Lrch3	Litaf
Lrguk	Lmna
Lrp1b	Lmo4
Lrrc3b	Lmod1
Lrrc42	Lmx1b
Lrrc46	Lnpk
Lrrc74a	Loxhd1
Lrrc8d	Lpin2
Lrrn3	Lrg1
Lrrtm2	Lrp1
Lsm11	Lrpap1
Lsm14b	Lrrc10b
Lsm6	Lrrc18
Lum	Lrrc20
Lyn	Lrrc28
Lyrm2	Lrrc49
Lyzl1	Lrrc74a
Mab21l2	Lrrc8b
Maf	Lrrc8c
Mafb	Lrrn3
Maml3	Lsm3
Man1a	Ltbp3
Man2a1	Ltc4s
Map1b	Ltk
Map3k14	Ly6g5c
Map3k4	Lyrm2
Map3k5	Macrod1
Map3k8	Maf
Map4k2	Mag
Map7	Maml2
Mapk3	Man2a1
Mapkapk3	Man2a2
Mapkbp1	Manba
Mapt	Map2k2
Marco	Map3k1
Marveld2	Map3k20
Mast2	Map3k6
Matn3	Map3k7
Matn4	Map4k1
Max	Mapk13
Mbip	March8
Mc4r	Mark3
Mctp2	Mark4
Mdh1	Marveld1
Mdm1	Mat2a
Med30	Matk
Mef2c	Matn4
Mei4	Max
Meox2	Mb21d2
Metap1d	Mc1r
Mettl4	Mc4r
Mettl7a1	Mcm10
Mettl8	Mcoln1
Mfsd2a	Mcrs1
Mfsd2b	Mdfi
Mfsd4a	Mdm1
Mga	Me3
Mgat4e	Med16
Mgat5	Med7
Mgea5	Medag
Mgst2	Mef2a
Mid1ip1	Megf11
Mllt1	Megf9
Mllt10	Meox1
Mmel1	Mex3c
Mmp20	Mfap2
Mmp7	Mfsd13a
Mmrn2	Mfsd4a
Moap1	Mgat1
Mob4	Mgat4b
Mon2	Mgea5
Morn2	Mgme1
Mospd1	Mgrn1
Mospd3	Mical3
Mphosph6	Micall2
Mrgprh	Mief1
Mrpl13	Mipol1
Mrpl16	Mis18a
Mrps10	Mkl1
Mrps2	Mkrn1
Mrps24	Mlkl
Mrps26	Mn1
Mrps27	Mogs
Msh2	Morn3
Msi2	Mpc1
Msrb3	Mphosph6
Msto1	Mpi
Msx2	Mpp2
Mtap	Mpzl1
Mtcl1	Mrc2
Mtfr2	Mrm2
Mthfd1l	Mrpl14
Mthfs	Mrpl28
Mtmr12	Mrpl4
Mtss1	Msi1
Mtus2	Msi2
Musk	Msrb3
Myc	Msx2
Mycbp2	Mtf1
Mycl	Mtmr10
Mycn	Mtmr4
Myef2	Mtus1
Myl10	Mtus2
Myl9	Muc5b
Mymx	Mutyh
Myo1d	Mvb12b
Myo3a	Mxi1
Myo3b	Mycn
Myom1	Mydgf
N4bp2	Myg1
Nab1	Myh14
Nadk	Myl10
Nap1l3	Myl9
Napa	Mylk2
Nars	Mylpf
Nat10	Mymx
Nat9	Myo3a
Ncam1	Myom1
Ncf1	Myom3
Nckap5l	Myoz3
Ncoa3	Myrf
Ndfip2	N4bp1
Ndrg4	Naa20
Ndst3	Nacc2
Ndufb4	Nadk
Ndufb9	Nagk
Ndufs4	Naprt
Necab1	Nav2
Nedd9	Naxd
Nek4	Ncbp2
Nek7	Nccrp1
Nelfa	Ncf1
Neo1	Nckap5l
Neurod2	Ncoa3
Nfam1	Ncor2
Nfatc2	Ncs1
Nfia	Ndst4
Nfkbia	Ndufaf8
Nfkbiz	Ndufs4
Ngly1	Ndufv3
Nhlh1	Nedd4
Nhlrc2	Nedd9
Nhlrc3	Nek8
Nin	Neu1
Nipa1	Neurod2
Nipa2	Nfe2l2
Nkx2-1	Nfix
Nln	Nfkb1
Nmnat2	Ngfr
Nnmt	Nhej1
Nnt	Nhlrc2
Nog	Ninj2
Nol11	Nkain1
Nol4	Nkpd1
Nos1	Nlrc3
Notch2	Nlrp12
Npas1	Nmnat2
Npcd	Nmt1
Nphp3	Nmur2
Npl	Noa1
Npm3	Noc4l
Nppc	Nol11
Npsr1	Nol3
Nptxr	Nol4l
Nr1h4	Nop2
Nr1i2	Nos2
Nr1i3	Notch2
Nr2e1	Notch3
Nr3c1	Nov
Nr3c2	Npas4
Nr4a1	Npepl1
Nr4a3	Npffr1
Nrbf2	Npm3
Nrcam	Nr2e1
Nrip1	Nr3c2
Nsd2	Nr5a2
Nsg2	Nradd
Nsmaf	Nrap
Nsmce2	Nrde2
Nsmce3	Nrf1
Nt5c1b	Nrg3
Nt5e	Nrip1
Ntsr2	Nrxn3
Nuak2	Nsd1
Nucb2	Nsf
Nup155	Nt5c2
Nup210	Ntf5
Nvl	Ntn1
Nwd2	Ntng2
Nxnl1	Ntsr2
Nxph3	Nub1
Oaf	Nucb2
Ociad1	Nudc
Odf2	Nudt1
Ogfrl1	Nudt16l1
Oit1	Nudt18
Olfml2b	Numb
Olfr1442	Nup160
Olfr1505	Nup50
Olfr248	Nxnl1
Olfr279	Nxnl2
Olfr417	Nxph4
Olfr525	Oaf
Olfr99	Oas1e
Olig1	Oas2
Opa1	Oas3
Opalin	Obsl1
Orai2	Ofcc1
Os9	Ogg1
Osbpl10	Oit1
Osbpl8	Ola1
Osr1	Olfm1
Ostm1	Olfml2b
Ovol1	Olfr1393
P2rx1	Olfr1414
P2ry12	Olfr1442
Pabpc2	Olfr464
Pabpc4	Olig3
Pabpc5	Omp
Pacrg	Onecut3
Pacs1	Oog4
Pacsin2	Oprl1
Pag1	Osm
Pak6	Ostm1
Pamr1	Otub1
Paqr9	Otud3
Park7	Ovol1
Parp11	Ovol3
Parp16	Oxct2a
Parvg	P2rx1
Pax1	P2rx4
Pax9	P2ry6
Pcolce2	Padi6
Pcsk1	Paip2b
Pdcd4	Pak2
Pde1a	Pak4
Pde4d	Pamr1
Pde4dip	Papln
Pde7b	Papola
Pde8b	Paqr5
Pdlim1	Pard3b
Pdpk1	Pard6b
Pds5a	Parl
Pdss2	Parvb
Pdzd2	Parvg
Pdzd8	Pax2
Pdzk1	Pax6
Pdzrn4	Pax9
Pfdn1	Pbx4
Pfkfb3	Pccb
Pfn2	Pcdh1
Pfn4	Pcdh10
Pgap1	Pcgf6
Pgc	Pdcd5
Pgm5	Pdcd6ip
Phactr1	Pde12
Phb	Pde1b
Phka2	Pde4a
Phkg1	Pde4c
Phlda1	Pde4d
Phxr2	Pde6g
Phyhd1	Pde9a
Pi4k2a	Pdgfrl
Pigv	Pdk1
Pih1d3	Pdk2
Pik3r1	Pdlim7
Pik3r3	Pdp1
Pik3r6	Pdzd2
Pim1	Pdzrn4
Pinlyp	Pebp1
Pip4k2a	Pepd
Pitpnc1	Pex5
Pitx2	Pex6
Plcd4	Pfdn1
Plcg1	Pgap1
Plcg2	Pgrmc1
Plch1	Pgs1
Plcl2	Phax
Plekha5	Phb
Plpp1	Phb2
Plxnc1	Phf1
Plxnd1	Phf20
Pmaip1	Phip
Pmel	Phka2
Pmepa1	Phkb
Pmfbp1	Phkg1
Pnldc1	Phospho1
Polb	Phyhd1
Poll	Phykpl
Polr2m	Pias4
Pou2f1	Pif1
Pou2f2	Pigp
Pou3f2	Pigz
Ppef1	Pik3cd
Pphln1	Pik3r1
Ppm1a	Pik3r6
Ppm1e	Pimreg
Ppm1h	Pinlyp
Ppp1r1c	Pitpnb
Ppp2ca	Pitpnc1
Ppp2r1a	Pitpnm3
Ppp2r5a	Pitx1
Ppp3ca	Piwil1
Ppp6r2	Pja1
Prag1	Pkig
Prcp	Pknox1
Prdm1	Pla2g1b
Prdm11	Pla2g2e
Prdm8	Pla2g3
Prep	Plbd2
Prickle1	Plcb3
Prkaa2	Plcd3
Prkab1	Plcg2
Prkab2	Plekhm2
Prkca	Plin3
Prkce	Plpp1
Prkcq	Plpp2
Prkcsh	Plpp7
Prl5a1	Plscr5
Prmt3	Plvap
Prom1	Plxna1
Prpf18	Plxnb3
Prpf40a	Plxnd1
Prpf6	Pmaip1
Prps1l1	Pmepa1
Prr11	Pmfbp1
Psen2	Pmm2
Psme4	Pmpca
Ptbp2	Pnpla1
Ptpn13	Pofut1
Ptpn20	Pogk
Ptpra	Polr2i
Ptprs	Polr2m
Ptprz1	Pomp
Pus10	Pomt1
Pwwp2b	Pou2f2
Qk	Pp2d1
Rab11fip1	Ppara
Rab11fip2	Ppard
Rab1a	Ppid
Rab6b	Ppif
Rabif	Ppil6
Rad17	Ppl
Rad23b	Ppp1r12c
Rad51b	Ppp1r13b
Raet1d	Ppp1r26
Raf1	Ppp1r37
Rag2	Ppp1r3c
Rai1	Ppp2r1a
Ralbp1	Ppp2r2a
Ranbp10	Ppp2r2c
Rap1a	Ppp2r3c
Rap1b	Ppp2r5c
Rap1gds1	Ppp6c
Rasa2	Ppp6r2
Rasl11b	Ppt1
Rax	Pqlc2
Rbm20	Pramef8
Rbm26	Prdm11
Rbm47	Prdm13
Rbms2	Prelid1
Rcc1l	Prex1
Rcl1	Prickle1
Reep3	Prkaa2
Rel	Prkab1
Rell1	Prkch
Rep15	Prox1
Reps1	Prpf3
Rere	Prpf40a
Rftn2	Prpf40b
Rfx4	Prr12
Rfx7	Prr7
Rgs1	Prrc2b
Rgs6	Prrc2c
Rhobtb1	Prss23
Rhov	Prss27
Ric8b	Prtg
Rilpl2	Prx
Rims1	Psapl1
Ripk2	Psma6
Ripor2	Psmb2
Rmi2	Psmc1
Rmnd5a	Psmg3
Rnase11	Psrc1
Rnase6	Pstpip2
Rnf103	Ptch2
Rnf150	Ptdss2
Rnf152	Pten
Rnf7	Ptgis
Rpia	Ptk2
Rpl10-ps3	Ptma
Rplp1	Ptpn1
Rpp40	Ptpn21
Rprm	Ptpn6
Rps15	Ptprb
Rps6ka5	Ptprf
Rptor	Ptprj
Rrbp1	Ptprs
Rrp12	Pum2
Rsph1	Pwwp2b
Rtkn2	Qrich1
Rtl1	Qtrt1
Rtn4	Rab11a
Runx1t1	Rab20
Runx3	Rab27a
Ryr3	Rab36
S100g	Rab3a
S100z	Rab44
S1pr3	Rab4a
Sae1	Rab5a
Sall3	Rab6b
Sall4	Rabep2
Samd5	Rac1
Samhd1	Rad23b
Samsn1	Rad51b
Saraf	Rad51c
Sash1	Ralgapa1
Satb1	Ralgapb
Satb2	Ralyl
Sav1	Rap1b
Sbds	Rapgef2
Sbf1	Rapgef4
Sbno2	Rara
Scaf11	Rasa2
Scaf8	Rasgrf1
Scamp1	Rasl11b
Sccpdh	Rbbp5
Scg2	Rbfox2
Scgb1a1	Rbm15
Schip1	Rbm19
Scml4	Rbm20
Scn3a	Rbm22
Scn7a	Rbm38
Scrn2	Rbpjl
Sdc4	Rbpms2
Sdccag8	Rcc1l
Sec14l3	Rcc2
Sec14l4	Rdh12
Sec22b	Reep3
Sec24b	Rest
Sec61b	Rflna
Sec63	Rfx7
Sel1l3	Rgmb
Selp	Rgs10
Sema4c	Rgs11
Sema6a	Rgs6
Sema6c	Rgs9
2021-09-05	Rhobtb1
Sergef	Rhot2
Serp2	Rhou
Sestd1	Rhov
Sf1	Rhpn1
Sf3b6	Rin2
Sfmbt2	Ripor1
Sfxn5	Rit1
Sgk2	Rnf152
Sgk3	Rnf165
Sh2b2	Rnf17
Sh2b3	Rnf185
Sh3bgrl2	Rnf220
Sh3rf1	Rnf7
Shc3	Rnh1
Shcbp1	Rnls
Shroom3	Ropn1l
Siglec15	Rp9
Siglech	Rpap1
Sil1	Rpap3
Sim1	Rpgrip1
Sipa1l1	Rpl11
Sipa1l2	Rpl14
Sis	Rpl19
Ska2	Rpl24
Slc10a6	Rpl34
Slc10a7	Rpn1
Slc12a9	Rprd2
Slc13a1	Rps11
Slc15a4	Rps15
Slc17a8	Rps4x
Slc1a2	Rps6ka4
Slc22a16	Rps6kc1
Slc24a4	Rragc
Slc24a5	Rrbp1
Slc25a12	Rreb1
Slc25a21	Rrm1
Slc25a30	Rrp1
Slc27a1	Rrp1b
Slc30a5	Rrs1
Slc35c1	Rsg1
Slc35f5	Rsph14
Slc37a4	Rsph6a
Slc38a1	Rtn4rl2
Slc38a11	Rtp1
Slc38a2	Rxfp4
Slc38a9	Ryr1
Slc39a11	S1pr2
Slc3a2	S1pr3
Slc44a5	Sall3
Slc45a1	Sall4
Slc4a11	Samsn1
Slc6a5	Sar1b
Slc7a1	Sardh
Slc7a5	Sars
Slc7a9	Sbf1
Slc8a3	Sbno2
Slco2a1	Scaf11
Slco3a1	Scaf8
Slco5a1	Scg5
Slco6c1	Scgb1a1
Slco6d1	Scn1b
Sltm	Scn2a
Smad3	Scrn3
Smad7	Scube3
Smarcad1	Scyl1
Smarce1	Sdc4
Smg9	Sdccag8
Smim13	Sdr42e1
Smim15	Selenoo
Smim20	Selplg
Smoc1	Sema4a
Smu1	Sema4b
Smurf2	Sema4c
Snap29	Sema4d
Snrnp35	Sema5b
Snrpd3	Senp5
Sntb1	Sept1
Snw1	Sept4
Snx3	Sept8
Snx32	Sept9
Snx5	Serinc3
Snx6	Sertad1
Socs2	Setd2
Socs5	Setd3
Sorbs1	Setx
Sowahb	Sf3b5
Sox18	Sfmbt2
Sox4	Sgk3
Sox5	Sgsm3
Sox9	Sh2b3
Sp5	Sh2d6
Spag6	Sh3pxd2a
Spag9	Shank1
Spata32	Shank2
Spats2	Shc3
Spats2l	Sik1
Spdye4c	Six3
Speg	Six5
Spint1	Slc16a6
Spock2	Slc17a7
Spop	Slc1a2
Spred1	Slc22a12
Spry2	Slc24a3
Sptbn1	Slc25a21
Srebf1	Slc25a27
Srgn	Slc25a34
Srp9	Slc25a44
Srsf9	Slc25a48
Sspn	Slc26a10
Ssr2	Slc27a1
Sstr2	Slc28a1
Ssu2	Slc29a2
St3gal1	Slc30a2
Stam2	Slc30a5
Stard3nl	Slc35f5
Stard9	Slc37a1
Stat3	Slc38a1
Stk16	Slc38a10
Stk17b	Slc38a9
Stk24	Slc43a1
Stox1	Slc5a2
Strn	Slc6a1
Stt3b	Slc6a21
Stum	Slc6a6
Stx3	Slc6a9
Stxbp1	Slc7a1
Stxbp5l	Slc7a12
Stxbp6	Slc7a15
Sugct	Slc7a5
Sulf1	Slc9a1
Sumf2	Slco2a1
Supt3	Slco5a1
Susd5	Slco6d1
Sv2b	Slitrk5
Syk	Slpi
Synrg	Slu7
Syt13	Slx4
Syt6	Smad4
Sytl2	Smad7
Taf4	Smarca2
Tamm41	Smarcal1
Tanc1	Smarcc1
Tapt1	Smarcd3
Tarbp1	Smc3
Tas2r118	Smg7
Tas2r119	Smim11
Tbc1d1	Smndc1
Tbc1d30	Smpd2
Tbc1d5	Snai1
Tbc1d7	Snn
Tbca	Snrnp40
Tbl1xr1	Snrpe
Tbx18	Sntg1
Tbx19	Snx15
Tbx2	Snx29
Tcf20	Snx32
Tcf4	Soat1
Tcf7l1	Soat2
Tcirg1	Socs1
Tcstv3	Socs3
Tdrd12	Sorcs2
Tdrd3	Sowaha
Tecpr1	Sox13
Tecpr2	Sox2
Tecrl	Sox30
Terf2	Sp4
Tex14	Sp8
Tex2	Sp9
Tex43	Spata2
Tex9	Spata33
Tfcp2	Spata7
Tfdp2	Spc24
Tfeb	Spdya
Tfpi	Spdye4a
Tfr2	Spdye4b
Tgfb3	Spdye4c
Tgfbr2	Spem1
Tgfbr3	Spen
Tgif2lx1	Spink2
Tgoln1	Spint1
Tgs1	Spry2
Thada	Srcin1
Thoc7	Srek1
Tiam2	Srpk3
Tigit	Srsf10
Timm21	Srsf3
Timm8a2	Ssr1
Tjp2	St3gal1
Tk2	St3gal4
Tldc2	St6galnac2
Tle3	St6galnac4
Tle4	St6galnac6
Tlk1	Stac2
Tll2	Stard7
Tlnrd1	Stim1
Tlr1	Stk32a
Tm2d1	Stk32b
Tmbim6	Stk32c
Tmc6	Stk38
Tmcc2	Stk39
Tmco2	Stmnd1
Tmco5	Stn1
Tmem104	Ston2
Tmem108	Stpg4
Tmem120b	Stx11
Tmem132c	Stx12
Tmem163	Stx8
Tmem164	Sulf1
Tmem171	Sulf2
Tmem191c	Sult1a1
Tmem192	Sumf2
Tmem248	Sumo1
Tmem252	Supt16
Tmem255a	Supt3
Tmem26	Susd4
Tmem265	Suz12
Tmem38b	Syk
Tmem40	Syndig1l
Tmem55a	Syne3
Tmem57	Syngr1
Tmem64	Syngr3
Tmem69	Synrg
Tmigd3	Syt11
Tmprss13	Syt13
Tmtc2	Syt7
Tnfrsf13c	Szt2
Tnfrsf18	T
Tnfsf18	Tab1
Tnp1	Tab2
Tnrc6b	Tac4
Tnrc6c	Tada1
Tns1	Tanc1
Tob1	Taok3
Tom1l1	Tapbp
Tomm20	Tapbpl
Top1	Tas2r118
Tox	Tbc1d15
Tpp2	Tbcb
Tprg	Tbx19
Tpt1	Tcea2
Tram1l1	Tcf3
Trappc2	Tcf4
Trem2	Tcf7l1
Trhde	Tcf7l2
Trib1	Tcp11
Tril	Tcte1
Trim24	Tctex1d2
Trim29	Tead2
Trim37	Tead4
Trim47	Tecpr2
Trim71	Tecrl
Trim8	Terf2
Trip6	Tesc
Triqk	Tesmin
Trpa1	Tex14
Trpc4	Tex19.1
Trpm3	Tex19.2
Tsc22d1	Tex36
Tsc22d2	Tex44
Tshb	Tex9
Tshz3	Tfap2a
Tslp	Tfcp2
Tsn	Tfdp2
Tspan12	Tfeb
Tspan2	Tfpi
Tspan5	Tgfb1i1
Tspear	Tgoln1
Tspo	Tha1
Ttc17	Thap12
Ttc30a2	Thap8
Ttc30b	Thg1l
Ttc32	Thoc2
Ttc7b	Thoc3
Ttc8	Thsd7b
Ttll10	Tiam2
Ttll12	Ticam1
Ttll5	Tigit
Ttll7	Timm21
Tubgcp5	Tlk2
Tulp1	Tln2
Twist2	Tlr5
Twsg1	Tm6sf1
Txndc9	Tmbim6
Tyw5	Tmc6
Uap1	Tmco2
Ubap2	Tmco4
Ubash3a	Tmed1
Ube2g2	Tmem119
Ube2r2	Tmem120b
Ubr3	Tmem132e
Ubxn6	Tmem151b
Ufm1	Tmem170b
Uggt1	Tmem179
Ugp2	Tmem191c
Ulk4	Tmem222
Unc5c	Tmem259
Upk1a	Tmem26
Upk1b	Tmem52
Uqcc2	Tmem53
Uqcrc2	Tmem57
Urad	Tmem59
Urgcp	Tmem63b
Usp10	Tmem65
Usp24	Tmem92
Usp3	Tmtc2
Usp46	Tnfaip8
Usp6nl	Tnip1
Utf1	Tnnt1
Utrn	Tnp1
Uxs1	Tnrc6a
Vangl2	Tnrc6b
Vasn	Tnrc6c
Vcpip1	Tns1
Vgll4	Tns4
Vil1	Tollip
Vit	Tom1l1
Vmn1r1	Tomm20
Vmn1r233	Tor1a
Vmn2r1	Tor1b
Vmn2r89	Tor2a
Vps26a	Tpd52
Vps50	Tpm1
Vrk1	Tpra1
Wbp2	Tpsg1
Wdcp	Tpt1
Wdfy2	Trabd2b
Wdpcp	Traf1
Wdr11	Traf4
Wdr18	Trappc2l
Wdr26	Trappc4
Wdr41	Trappc9
Wdr66	Treml2
Wdsub1	Treml4
Wee1	Trhde
Wnt5b	Trhr2
Wsb1	Trim29
Wwox	Trim3
Xcl1	Trim47
Xrcc1	Trim71
Xrn1	Trim8
Xxylt1	Triobp
Xylt1	Trpa1
Ybx2	Trpc3
Yipf5	Trpm1
Ypel5	Trpm4
Ywhag	Trpm5
Zbp1	Trub1
Zbtb16	Tshb
Zbtb18	Tshz3
Zbtb20	Tspan10
Zbtb33	Tspan14
Zbtb37	Tspan2
Zc3h4	Tspan9
Zdhhc17	Tssc4
Zdhhc2	Tstd1
Zeb2	Ttc16
Zfat	Ttc17
Zfp142	Ttc25
Zfp143	Ttc3
Zfp277	Ttc7
Zfp326	Ttll3
Zfp330	Tubd1
Zfp345	Tubgcp6
Zfp365	Tulp1
Zfp36l1	Uba5
Zfp36l2	Ube2d1
Zfp423	Ube2d4
Zfp462	Ube2h
Zfp536	Ucma
Zfp541	Ufd1
Zfp574	Ulk4
Zfp608	Umodl1
Zfp64	Umps
Zfp646	Uncx
Zfp648	Upk3a
Zfp652	Upp1
Zfp668	Upp2
Zfp7	Uqcrc1
Zfp703	Ush2a
Zfp804a	Usp20
Zfp867	Usp32
Zfp950	Usp46
Zfp958	Utp6
Zfp961	Uvrag
Zfr	Vav2
Zfx	Vcan
Zic2	Vcpip1
Zic5	Vdac1
Zkscan17	Vegfa
Zmat3	Vgll4
Zmym4	Vmn1r233
Zmynd8	Vmp1
Zpld1	Vps50
	Vrk1
	Vrtn
	Vstm4
	Vsx1
	Wars2
	Wasf2
	Washc3
	Wbp2
	Wdr26
	Wdr43
	Wdr70
	Wdr90
	Wdsub1
	Wdtc1
	Wfs1
	Wipf2
	Wipi1
	Wnk2
	Wnt11
	Wnt3
	Wnt7b
	Wsb1
	Wwox
	Xcl1
	Xiap
	Xpo4
	Xylt1
	Xylt2
	Yeats4
	Yrdc
	Ywhah
	Zan
	Zap70
	Zbtb14
	Zbtb18
	Zbtb20
	Zbtb7a
	Zc3h12d
	Zc3hav1
	Zc3hav1l
	Zcchc24
	Zcchc6
	Zcchc7
	Zfand2a
	Zfand3
	Zfhx3
	Zfp239
	Zfp281
	Zfp324
	Zfp362
	Zfp365
	Zfp36l1
	Zfp36l2
	Zfp385c
	Zfp39
	Zfp423
	Zfp446
	Zfp507
	Zfp521
	Zfp536
	Zfp574
	Zfp592
	Zfp598
	Zfp638
	Zfp64
	Zfp653
	Zfp7
	Zfp710
	Zfp746
	Zfp831
	Zfp839
	Zfp948
	Zfpm1
	Zfyve21
	Zfyve26
	Zhx1
	Zic2
	Zic4
	Zmat4
	Zmat5
	Zmiz1
	Zmynd11
	Zmynd8
	Zscan2

## Sheet: ST10
Supplemental Table 10. Terms enriched for in regions with increased binding of ZNF384 fusion oncoproteins.
ID	Term	Ontology Source	Term PValue	Term PValue Corrected with Bonferroni step down	Associated Genes Found
GO:0034109	homotypic cell-cell adhesion	GO_BiologicalProcess-EBI-UniProt-GOA-ACAP-ARAP_13.05.2021_00h00	0.000362154	0.0307831	[Ctnna3, Cxadr, Prkca, Stxbp1, Tjp2, Zfp703]
GO:0098876	vesicle-mediated transport to the plasma membrane	GO_BiologicalProcess-EBI-UniProt-GOA-ACAP-ARAP_13.05.2021_00h00	0.000275671	0.0239834	[Cnst, Eps15, Exoc4, Golph3l, Grasp, Ndrg4, Stx3, Zdhhc2]
GO:0140056	organelle localization by membrane tethering	GO_BiologicalProcess-EBI-UniProt-GOA-ACAP-ARAP_13.05.2021_00h00	0.000295801	0.0254389	[Exoc4, Ndrg4, Psen2, Stx3, Stxbp1, Sytl2]
GO:1904377	positive regulation of protein localization to cell periphery	GO_BiologicalProcess-EBI-UniProt-GOA-ACAP-ARAP_13.05.2021_00h00	0.000152013	0.0135291	[Cnst, Pdpk1, Sorbs1, Stx3, Trem2, Zdhhc2]
GO:1903076	regulation of protein localization to plasma membrane	GO_BiologicalProcess-EBI-UniProt-GOA-ACAP-ARAP_13.05.2021_00h00	0.000451355	0.0374625	[Cnst, Grasp, Pdpk1, Sorbs1, Stx3, Trem2, Zdhhc2]
GO:1903078	positive regulation of protein localization to plasma membrane	GO_BiologicalProcess-EBI-UniProt-GOA-ACAP-ARAP_13.05.2021_00h00	8.42113e-05	0.00791587	[Cnst, Pdpk1, Sorbs1, Stx3, Trem2, Zdhhc2]
GO:0035710	CD4-positive, alpha-beta T cell activation	GO_BiologicalProcess-EBI-UniProt-GOA-ACAP-ARAP_13.05.2021_00h00	0.000366923	0.0308215	[Lgals7, Ripk2, Runx3, Tcirg1, Tnfsf18, Twsg1, Xcl1]
GO:0046633	alpha-beta T cell proliferation	GO_BiologicalProcess-EBI-UniProt-GOA-ACAP-ARAP_13.05.2021_00h00	0.000114637	0.0106612	[Lgals7, Ripk2, Tnfsf18, Twsg1, Xcl1]
GO:0035739	CD4-positive, alpha-beta T cell proliferation	GO_BiologicalProcess-EBI-UniProt-GOA-ACAP-ARAP_13.05.2021_00h00	1.1133e-05	0.00106877	[Lgals7, Tnfsf18, Twsg1, Xcl1]
GO:0046636	negative regulation of alpha-beta T cell activation	GO_BiologicalProcess-EBI-UniProt-GOA-ACAP-ARAP_13.05.2021_00h00	0.000143649	0.0129284	[Lgals7, Runx3, Tnfsf18, Twsg1, Xcl1]
GO:2000514	regulation of CD4-positive, alpha-beta T cell activation	GO_BiologicalProcess-EBI-UniProt-GOA-ACAP-ARAP_13.05.2021_00h00	0.000119057	0.0108342	[Lgals7, Ripk2, Runx3, Tnfsf18, Twsg1, Xcl1]
GO:0046642	negative regulation of alpha-beta T cell proliferation	GO_BiologicalProcess-EBI-UniProt-GOA-ACAP-ARAP_13.05.2021_00h00	0.000494246	0.0405282	[Lgals7, Twsg1, Xcl1]
GO:2000515	negative regulation of CD4-positive, alpha-beta T cell activation	GO_BiologicalProcess-EBI-UniProt-GOA-ACAP-ARAP_13.05.2021_00h00	3.47865e-05	0.00330472	[Lgals7, Runx3, Tnfsf18, Twsg1, Xcl1]
GO:2000561	regulation of CD4-positive, alpha-beta T cell proliferation	GO_BiologicalProcess-EBI-UniProt-GOA-ACAP-ARAP_13.05.2021_00h00	0.000229821	0.0202242	[Lgals7, Twsg1, Xcl1]
GO:2000562	negative regulation of CD4-positive, alpha-beta T cell proliferation	GO_BiologicalProcess-EBI-UniProt-GOA-ACAP-ARAP_13.05.2021_00h00	0.000119007	0.0109486	[Lgals7, Twsg1, Xcl1]

[truncated: 5 more sheets: ST11, ST12, ST13, ST14, ST15]
